# Supplementary material for: CTP and parS coordinate ParB partition complex dynamics and ParA-ATPase activation for ParABS-mediated DNA partitioning
Source: eLife. 2021 Jul 21;10:e65651. doi: 10.7554/eLife.65651 (PMC8357417; doi:10.7554/eLife.65651)
Supplement: Source data 1. — One Excel file with 19 sheets: Numerical data for Figure 2A-E, Figure 2F,G, Figure 2—figure supplement 2, Figure 2—figure supplement 4, Figure 3A-C, Figure 3D, Figure 4A-D, Figure 4E, Figure 4—figure supplement 1B, Figure 4—figure supplement 2A-D, Figure 5A-D, Figure 5E,F, Figure 5—figure supplement 1B, Figure 5—figure supplement 2, Figure 6A, Figure 6B - left, Figure 6B - right, Figure 6C, Figure 6—figure supplement 1A, Figure 6—figure supplement 1B, Figure 6—figure supplement 2, Figure 6—figure supplement 3. [file elife-65651-data1.xlsx]

## Sheet: 2-SD1
Figure 2A							Figure 2B							Figure 2C							Figure 2D							Figure 2E
	ParA			ParB				ParA			ParB				ParA			ParB				ParA			ParB				ParA			ParB
Time (s)	N=8			N=3			Time (s)	N=12			N=3				N=8			N=8				N=9			N=9			Time (s)	N=3			N=3
	Average	SEM		Average	SEM			Average	SEM		Average	SEM		Time (s)	Average	SEM		Average	SEM		Time (s)	verage	SEM		verage	SEM		0	Average	SEM		Average	SEM
							0	163.753	11.2527		9.93533	2.97689									0	5391.11	361.911		6069.61	296.794		1	4422.36	82.305		5549.42	78.6404
1	25.1926	3.95693		5.45363	0.832049		1	140.971	10.9017		4.36213	0.666177		1	23.9815	3.6809		35.5486	6.98008		1	5159.96	354.231		5523.15	283.233		2	4236.95	77.647		5418.81	47.6749
2	37.7552	5.14914		7.67936	0.644061		2	126.988	10.434		3.52226	0.381983		2	51.4554	7.45545		70.4916	9.17193		2	4888.77	344.573		5083.65	275.662		3	4117.75	63.4709		5332.09	49.8134
3	47.8244	5.77364		9.81854	0.389641		3	115.026	9.64801		3.14027	0.29003		3	79.0034	10.0966		103.747	10.8717		3	4570.73	331.504		4665.16	269.728		4	4036.93	79.9745		5245.88	48.0656
4	56.8649	6.40644		10.336	1.12043		4	105.221	9.15794		2.87153	0.345649		4	104.624	13.9912		137.018	14.0005		4	4287.24	321.316		4285.44	262.849		5	3966.96	51.6119		5161.99	43.8539
5	65.4495	7.09023		9.99009	0.819226		5	95.1521	8.54938		2.71571	0.362023		5	133.017	17.3253		173.554	16.423		5	3985.01	312.755		3933.74	250.329		6	3925.44	64.3457		5100.6	33.8044
6	73.3568	7.84		10.7912	0.867857		6	86.1586	8.03408		2.72126	0.283358		6	160.087	20.5		203.001	20.1382		6	3705.33	302.14		3590.47	245.991		7	3822.65	68.8615		5007.91	31.6299
7	80.2291	8.51352		10.487	0.775794		7	78.6309	7.48063		2.82617	0.16139		7	188.299	24.2733		238.89	23.2576		7	3431.86	294.584		3273.9	239.813		8	3776.01	69.2826		4951.11	40.7186
8	86.3604	9.48626		11.4415	0.678739		8	71.6537	7.11904		2.36473	0.249365		8	217.874	29.1576		274.227	27.4053		8	3168.04	278.897		2979.72	231.459		9	3710.8	49.1725		4864.76	32.1157
9	91.5978	9.8414		11.1146	0.48626		9	65.1714	6.68793		2.53274	0.255755		9	244.393	32.3886		308.471	31.8868		9	2917.85	272.637		2692.92	227.145		10	3674.34	57.1919		4761.32	22.1492
10	96.2757	10.5073		11.3206	0.8572		10	58.9897	6.24328		2.37167	0.320423		10	271.636	35.6598		337.999	35.5256		10	2671.93	257.179		2426.42	215.898		11	3603.36	44.5255		4698.79	21.4788
11	101.478	11.3994		11.4583	0.995979		11	53.8245	5.77926		2.35409	0.264333		11	300.229	38.6125		373.26	38.8158		11	2458.24	249.113		2186.39	211.145		12	3558.58	67.8		4623.14	22.2027
12	105.422	11.9935		12.1291	0.980088		12	48.6085	5.40556		2.19426	0.334517		12	324.489	42.8714		405.866	42.0035		12	2251.96	241.354		1964.06	204.411		13	3508.55	37.3663		4560.27	27.3292
13	109.455	12.2402		12.5307	1.66968		13	44.4581	4.9893		2.12514	0.328184		13	354.452	46.3742		434.011	44.5717		13	2049.26	229.548		1753.49	195.633		14	3447.06	68.76		4495.36	31.7326
14	113.164	12.741		12.1859	1.13176		14	40.3473	4.69315		2.16155	0.258426		14	379.94	48.7728		465.193	48.2524		14	1873.71	218.329		1565.83	187.652		15	3419.86	51.2258		4420.15	26.8377
15	116.914	13.2617		12.9875	1.75496		15	37.1489	4.38141		2.02594	0.305402		15	406.056	52.6331		502.689	53.5043		15	1698.51	211.843		1387.37	183.46		16	3346.29	67.1167		4350.4	27.5041
16	119.77	13.5367		12.5927	1.53104		16	34.1717	4.02194		1.93384	0.383553		16	432.96	56.0887		528.189	57.793		16	1542.58	199.115		1225.76	173.218		17	3301.05	51.1671		4286.47	32.0046
17	123.653	13.9267		12.8939	0.954009		17	31.0471	3.63767		1.88108	0.377826		17	459.402	58.5194		566.655	61.0688		17	1397.57	187.255		1079.46	163.977		18	3264.06	45.4126		4225.69	21.9698
18	125.816	14.3655		12.7019	1.5187		18	28.5124	3.42517		1.85578	0.330222		18	486.984	62.5244		604.529	64.657		18	1266.23	177.667		953.979	156.342		19	3217.65	44.3631		4162.75	34.2203
19	128.775	14.4174		12.6024	1.25196		19	26.4319	3.27356		1.72526	0.240515		19	513.466	65.8053		628.533	70.1778		19	1142.29	165.794		839.318	146.36		20	3178.27	48.0405		4091.27	32.8975
20	131.017	14.5876		12.2024	1.11766		20	24.31	3.00754		1.9431	0.151548		20	538.416	68.6771		664.645	73.316		20	1034.62	158.551		738.29	140.522		21	3107.86	38.886		4035.08	26.3047
21	133.551	15.0824		12.5046	0.89048		21	22.5068	2.77854		1.93014	0.303251		21	568.03	72.033		700.083	77.5558		21	934.971	147.485		646.453	131.231		22	3065.9	47.2551		3979.94	25.2575
22	135.509	14.9784		12.7945	1.23643		22	20.9344	2.55936		1.94572	0.170458		22	592.746	74.9408		732.44	81.0287		22	845.956	138.691		567.358	123.992		23	3024.74	53.5406		3907.63	25.9355
23	137.707	15.1713		12.4465	1.79632		23	19.5368	2.36731		1.64272	0.299217		23	617.9	78.0735		768.426	84.8942		23	765.909	128.7		497.304	115.431		24	2980.39	56.5677		3857.07	38.1336
24	139.759	15.3615		11.5219	1.09444		24	17.8686	2.17848		1.60199	0.399108		24	645.689	81.3794		793.927	90.0245		24	696.363	121.12		438.764	109.353		25	2944.37	53.9412		3778.43	22.9505
25	141.223	15.25		11.847	1.05186		25	17.1495	2.1512		1.62776	0.38779		25	673.355	85.1409		825.403	94.3922		25	634.384	113.146		387.924	102.68		26	2902.21	60.7419		3731.97	24.896
26	143.44	15.7572		11.6589	1.26877		26	15.9848	1.94512		1.51653	0.296373		26	700.966	88.7903		862.058	100.305		26	578.643	104.762		344.564	95.4561		27	2871.23	40.4329		3683.05	20.9886
27	145.07	15.4218		10.9426	1.35651		27	14.8646	1.87688		1.44386	0.357693		27	727.593	92.5901		899.241	103.777		27	530.456	97.2373		305.871	89.0913		28	2837.57	38.9341		3630.03	16.3191
28	146.389	15.6181		11.2187	1.17872		28	14.0393	1.72457		1.35916	0.343909		28	756.054	95.9277		925.697	107.67		28	487.176	92.1185		274.886	84.8107		29	2787.94	41.9147		3571.61	28.8886
29	146.887	15.9632		10.9056	0.644071		29	13.2267	1.57221		1.28172	0.306754		29	779.972	98.3586		963.091	113.881		29	450.251	85.9885		248.327	79.7656		30	2745.01	25.2611		3523.68	27.5977
30	148.782	15.9798		11.3397	0.970007		30	12.4076	1.49723		1.38123	0.216854		30	804.902	101.073		996.455	117.066		30	415.111	79.8862		223.188	74.587		31	2713.9	41.8967		3455.38	20.8096
31	150.267	16.0996		11.5626	1.3673		31	11.5447	1.40255		1.46469	0.191564		31	835.154	105.555		1027.88	122.43		31	385.81	74.4457		203.493	69.9358		32	2671.47	39.4252		3408.22	22.0586
32	150.619	16.211		10.5595	0.951872		32	11.0204	1.32707		1.30069	0.229715		32	862.933	109.543		1054.16	126.94		32	361.4	71.2606		187.09	67.1094		33	2634.89	25.906		3352.61	23.3021
33	151.479	16.0882		11.1871	0.932138		33	10.5403	1.22491		1.45003	0.422198		33	890.71	112.563		1088.45	130.421		33	338.727	66.4236		172.642	62.919		34	2588.21	32.8236		3314.18	28.5202
34	152.655	16.3993		11.5137	1.59076		34	10.036	1.21718		1.301	0.207365		34	914.615	115.023		1124.75	135.097		34	317.502	62.6305		159.88	59.5518		35	2556.81	30.9692		3250.87	23.1558
35	153.616	16.5828		10.1137	1.55064		35	9.73398	1.17091		1.43815	0.119223		35	943.17	118.96		1156.67	139.518		35	300.829	60.0972		150.243	57.3877		36	2514.92	29.9099		3220.05	26.0545
36	154.036	16.5019		11.0737	1.12161		36	9.21279	1.09013		1.14133	0.271102		36	967.538	120.066		1182.24	142.607		36	285.539	57.3083		141.086	54.9519		37	2485.24	27.8408		3165.08	33.8655
37	155.297	16.5893		10.634	0.736151		37	8.70987	1.04227		1.30486	0.0523657		37	994.325	123.557		1215.77	147.008		37	270.764	53.4696		132.374	51.4659		38	2447.17	35.8775		3111.1	16.0522
38	157.01	16.915		11.4029	0.762959		38	8.55624	0.964514		1.41995	0.12753		38	1018.23	126.566		1245.58	152.156		38	258.123	51.1171		125.349	49.3521		39	2416.08	35.2425		3073.4	31.272
39	157.626	16.8515		11.3513	0.578429		39	8.0882	0.939767		1.18453	0.386341		39	1043.86	129.643		1276.73	154.711		39	248.025	49.8323		120.017	48.0769		40	2378.39	27.25		3029.12	20.6906
40	158.046	16.6515		11.9011	1.01473		40	7.70866	0.868423		1.28465	0.200142		40	1071.86	132.498		1310.28	160.347		40	238.139	47.9001		114.539	46.3405		41	2353.84	22.1648		2980.7	20.4701
41	157.928	16.6386		11.4067	0.661807		41	7.24202	0.844133		1.0753	0.208755		41	1094.52	135.246		1338.16	161.68		41	229.351	46.398		110.258	44.807		42	2311.07	21.191		2920.66	24.7538
42	159.538	16.768		11.5477	0.354859		42	7.43693	0.838805		1.33448	0.143599		42	1119.62	137.565		1376.66	166.44		42	219.683	44.148		105.289	42.8258		43	2296.78	26.296		2888.65	28.664
43	159.149	16.6677		11.9309	0.772395		43	7.1146	0.776328		1.04568	0.0489293		43	1146.89	141.244		1398.36	169.744		43	212.029	42.1703		101.38	40.9672		44	2249.38	28.1597		2834.63	29.7759
44	161.052	16.8065		12.1797	0.649129		44	6.72736	0.743649		0.945245	0.224513		44	1168.29	141.722		1433.56	174.686		44	203.805	40.7341		98.1999	39.6319		45	2223.72	21.9863		2805.86	26.9441
45	160.962	16.7374		13.1551	0.583892		45	6.56674	0.774006		1.20335	0.142908		45	1195.05	144.726		1467.78	178.34		45	198.108	39.9234		95.3412	38.8328		46	2193.27	24.9989		2757.48	29.0729
46	161.727	17.0443		13.2175	0.805623		46	6.4129	0.723954		1.12914	0.142107		46	1220.81	148.429		1496.73	181.687		46	192.425	38.9196		92.6317	37.8556		47	2167.46	19.9792		2720.88	24.2144
47	161.934	16.9645		12.9202	1.0586		47	6.00784	0.667499		0.964683	0.273295		47	1246.74	150.959		1532.7	185.64		47	185.491	37.221		89.2336	36.1707		48	2136.21	24.8128		2691.37	28.6032
48	162.789	17.163		12.8763	0.757943		48	5.88009	0.662983		0.940153	0.342285		48	1268.62	153.215		1563.58	190.812		48	181.271	36.3565		87.6515	35.3196		49	2102.49	26.008		2644.67	23.7344
49	163.527	17.1714		12.197	0.81806		49	5.66496	0.65512		0.830927	0.171874		49	1291.42	153.891		1591.44	193.365		49	174.584	34.6314		84.0905	33.7749		50	2084.77	21.9162		2606.75	24.5489
50	164.07	17.3704		13.4439	0.292584		50	5.19795	0.636936		0.84836	0.212048		50	1316.33	155.613		1623.44	198.77		50	171.653	34.2786		83.2105	33.421		51	2046.53	18.4804		2569.84	27.7161
51	163.9	17.3166		11.9195	0.140467		51	5.27594	0.642095		0.793283	0.183227		51	1338.78	158.227		1653.24	200.416		51	167.518	33.9569		81.2434	32.9335		52	2021	28.4163		2525.43	27.4763
52	164.365	17.5809		12.8561	0.429673		52	5.03254	0.645777		1.02454	0.347137		52	1361.87	160.071		1686.49	203.444		52	162.681	32.5815		79.1385	31.7218		53	1981.87	18.9725		2498.9	23.1954
53	164.971	17.3795		13.0609	0.0899553		53	4.7381	0.630585		0.898499	0.122934		53	1390.53	163.599		1709.49	207.206		53	159.464	31.928		77.8558	31.0491		54	1964.76	22.1688		2455.81	20.7726
54	165.177	17.5141		12.7282	0.528237		54	4.78769	0.543284		0.944627	0.317047		54	1413.8	166.521		1747.47	210.074		54	155.567	31.2438		76.4429	30.326		55	1940.5	13.5178		2418.14	24.8503
55	165.437	17.4607		13.1191	0.925772		55	4.54142	0.557296		0.657367	0.160792		55	1440.59	169.718		1774.52	213		55	152.257	30.9076		74.8167	30.0056		56	1905.91	21.5395		2370.43	30.3206
56	165.715	17.6091		12.5629	0.944887		56	4.5683	0.564052		0.754098	0.298452		56	1459.92	168.613		1806.09	216.083		56	149.594	30.5163		73.5655	29.5132		57	1883.86	18.9842		2358.99	21.5472
57	166.112	17.2497		12.7562	0.65259		57	4.3419	0.498703		0.935062	0.217632		57	1482	171.403		1831.36	220.53		57	146.091	29.7439		72.7036	28.6979		58	1862.83	17.6527		2318.23	27.0457
58	167.122	17.2878		13.1031	0.724352		58	4.1904	0.48448		0.845274	0.196321		58	1505.66	173.559		1862.4	221.294		58	141.889	28.4638		70.0002	27.5833		59	1828.97	24.66		2288.56	32.1417
59	167.924	17.448		13.2242	0.722952		59	4.26745	0.540585		0.762429	0.294435		59	1531.02	175.408		1892.54	226.71		59	140.516	28.3747		69.5401	27.4961		60	1802.67	14.2992		2248.81	28.1265
60	168.032	17.3364		12.9148	1.14305		60	3.87994	0.489859		0.525307	0.202488		60	1551.45	176.774		1916.35	228.39		60	136.972	27.3079		67.9791	26.441		61	1778.06	24.137		2225.49	25.1705
61	168.559	17.2693		13.255	0.521161		61	4.07148	0.448039		0.618181	0.228931		61	1574.75	178.187		1949.3	231.263		61	134.032	27.1301		66.9561	26.1835		62	1761.34	23.4025		2186.61	30.6252
62	168.114	17.1365		13.5136	0.563821		62	3.67651	0.451636		0.821362	0.0754297		62	1593.23	180.119		1979.45	231.951		62	131.849	26.2121		65.9553	25.3706		63	1746.65	17.4306		2156.07	28.2638
63	168.874	17.5951		13.0019	0.77568		63	3.73509	0.47802		0.529318	0.262372		63	1614.08	180.881		2003.86	234.824		63	129.091	25.8015		64.7319	24.9506		64	1710.67	9.24778		2124.4	30.1472
64	169.872	17.5428		12.8561	0.438574		64	3.69145	0.48516		0.814265	0.237709		64	1635.78	182.884		2030.76	240.908		64	127.468	25.8231		64.5255	24.8201		65	1689.74	7.9976		2084.32	22.1476
65	169.268	17.5329		13.442	0.954442		65	3.44144	0.425831		0.678194	0.139165		65	1661.62	184.569		2059.11	242.683		65	124.541	25.0143		63.2345	24.0205		66	1665.64	19.7045		2063.85	25.702
66	170.24	17.7521		12.2615	0.684321		66	3.48437	0.450938		0.445084	0.211835		66	1678.24	183.395		2080.74	244.687		66	122.545	24.9625		62.09	24.0385		67	1650.06	17.2785		2032.87	26.381
67	170.337	17.4589		13.1942	1.39392		67	3.53929	0.437753		0.540735	0.210024		67	1705.85	188.021		2122.82	248.605		67	121.355	24.5999		61.738	23.6475		68	1622.46	17.8987		2005.71	27.3986
68	170.191	17.517		14.0961	0.797223		68	3.2172	0.394936		0.375815	0.152059		68	1724.5	188.55		2149.74	251.54		68	118.54	23.6742		60.1926	22.7517		69	1599.99	16.6726		1977.13	21.6818
69	171.232	17.63		13.3959	1.13866		69	3.08116	0.355503		0.598125	0.350282		69	1749.38	190.393		2176.43	252.438		69	117.152	24.1373		59.8488	23.0537		70	1576.97	16.0006		1947.07	25.041
70	171.129	17.5737		13.2325	0.57971		70	3.19043	0.399508		0.688376	0.212006		70	1776.61	193.435		2200.37	254.302		70	113.686	22.8426		58.2683	21.8779		71	1556.07	19.6351		1925.71	25.2737
71	170.938	17.4982		13.2166	0.22231		71	3.28003	0.395042		0.482882	0.238536		71	1792.65	192.765		2231.64	259.144		71	113.29	23.1747		57.8584	22.1467		72	1535.2	14.6276		1905.7	24.6222
72	171.397	17.6145		12.8422	1.34536		72	2.95831	0.381539		0.486584	0.369981		72	1816.4	195.434		2261.4	260.399		72	111.083	22.4317		57.0085	21.5641		73	1514.85	18.075		1875.32	17.8786
73	171.813	17.611		13.5519	0.926819		73	3.08735	0.370653		0.578841	0.274651		73	1839.03	196.471		2286.02	261.044		73	109.151	22.1062		56.1011	21.1868		74	1488.76	19.5948		1841.12	28.2046
74	172.352	17.841		13.2555	0.692899		74	3.01692	0.332476		0.479796	0.0813187		74	1856.07	196.499		2310.45	265.333		74	107.779	21.7197		55.6686	20.8453		75	1474.89	17.9038		1816.29	18.9871
75	172.068	17.8499		14.3243	0.402553		75	2.77632	0.31745		0.475168	0.214718		75	1877.37	198.305		2340.46	267.249		75	105.852	21.0555		54.6296	20.222		76	1456.24	11.7234		1793.88	20.3655
76	172.446	17.9999		14.7234	0.33281		76	2.68197	0.34412		0.357765	0.183505		76	1904.61	199.455		2364.7	267.007		76	104.047	20.955		53.6459	20.0416		77	1439.89	11.7365		1768.87	26.1279
77	172.686	17.9939		14.6518	0.621751		77	2.56215	0.361332		0.552151	0.274042		77	1919.78	200.126		2386.36	269.667		77	103.036	21.1514		53.5194	20.1326		78	1415.84	16.1063		1745.92	20.8735
78	172.515	17.438		13.8405	0.27217		78	2.53662	0.338541		0.378436	0.385024		78	1939.28	198.791		2419.41	269.992		78	100.386	20.2378		52.115	19.3536		79	1401.28	17.5633		1712.58	20.4446
79	172.979	17.7941		13.7666	0.232959		79	2.42177	0.350808		0.343109	0.312558		79	1965.63	203.083		2443.54	273.451		79	99.1731	20.118		51.7889	19.1658		80	1373.83	17.137		1691.84	20.2752
80	173.659	17.6362		14.5272	0.637254		80	2.39301	0.418956		0.342183	0.288401		80	1986.19	204.164		2467.67	278.832		80	97.8543	20.038		51.017	19.1096		81	1354.66	12.946		1660.37	24.2578
81	174.256	17.4796		14.87	0.980012		81	2.42436	0.316185		0.387077	0.213269		81	2002.33	203.663		2492.31	276.994		81	95.6572	19.7229		50.1172	18.753		82	1343.32	11.8962		1650.42	22.0043
82	175.377	17.7429		15.0357	0.598118		82	2.17565	0.293137		0.346964	0.233082		82	2025.86	205.644		2517.47	276.458		82	94.4211	19.5169		49.4703	18.5782		83	1328.96	15.7465		1615.82	21.356
83	175.533	17.8091		14.7375	0.828893		83	2.27062	0.231107		0.4258	0.142552		83	2048.62	206.651		2542.65	279.721		83	93.3885	19.1397		48.7847	18.2508		84	1304.02	9.25813		1601.12	24.1584
84	175.882	17.5279		14.2635	0.391217		84	2.24608	0.335831		0.220304	0.282887		84	2064.23	206.2		2571.02	280.752		84	92.1433	18.9282		48.4693	18.009		85	1295.14	12.2445		1575.93	22.9466
85	175.985	17.6876		14.177	0.324305		85	2.40667	0.358503		0.411761	0.268047		85	2085.55	206.538		2600.2	284.788		85	91.3707	18.9483		48.226	17.9334		86	1281.29	10.2142		1552.75	21.1875
86	175.985	17.7666		14.1563	0.302791		86	2.26399	0.369475		0.225088	0.182564		86	2103	208.086		2626.57	284.695		86	89.7443	18.2611		47.398	17.2437		87	1253.32	11.2544		1528.56	19.6721
87	175.862	17.8478		14.4519	0.24615		87	2.11081	0.32186		0.107992	0.115206		87	2124.59	208.43		2655.74	292.37		87	88.3824	18.163		46.5781	17.2253		88	1240.58	3.60524		1512.46	22.4256
88	176.406	17.7517		14.7819	0.96789		88	2.33394	0.321548		0.103982	0.166087		88	2146.98	210.045		2680.3	290.799		88	86.7641	17.9864		45.6466	16.9983		89	1216.82	7.71496		1496.43	24.6387
89	176.626	18.0159		14.6413	0.947473		89	2.11803	0.28908		0.024837	0.170167		89	2169.77	211.281		2711.74	295.442		89	85.7752	18.1144		45.1555	17.1585		90	1208.13	11.1756		1473.24	19.7886
90	176.444	17.8031		14.9522	0.903058		90	1.99692	0.229185		0.181737	0.356755		90	2191.14	213.003		2741.5	292.408		90	84.7438	17.2142		44.9936	16.3874		91	1191.38	15.552		1446.46	22.6847
91	176.639	17.797		15.2348	1.31304		91	2.26492	0.2866		-0.046589	0.398013		91	2204.95	211.953		2759.23	295.453		91	83.2606	17.2965		44.2924	16.3662		92	1173.02	8.60563		1427.27	20.8512
92	177.289	17.741		16.1014	1.14563		92	2.1469	0.234664		-0.126195	0.180038		92	2224.38	212.858		2784.19	301.102		92	82.1365	17.239		43.74	16.2607		93	1156.04	8.21954		1410.46	20.0505
93	177.04	17.6348		16.272	1.84481		93	1.99024	0.251143		0.226013	0.0443615		93	2247.3	215.457		2813.84	299.755		93	80.7789	17.0065		42.9044	16.0011		94	1138.63	7.44253		1388.8	18.8032
94	177.31	17.5551		16.1091	1.10285		94	1.94733	0.268192		0.312099	0.261472		94	2260.49	212.652		2836.49	302.48		94	79.9775	16.784		42.6665	15.8005		95	1129.95	10.8448		1371.22	22.8055
95	178.088	17.6682		15.4425	1.17031		95	1.80231	0.232932		-0.139309	0.193165		95	2281.86	214.769		2856.2	303.114		95	78.4951	16.246		41.7908	15.3382		96	1112.75	13.8598		1349.15	19.3444
96	178.61	17.719		15.1973	1.2771		96	1.92583	0.239542		0.030856	0.20212		96	2303.22	214.822		2883.1	303.724		96	77.4378	15.9588		41.2127	15.0679		97	1103.32	11.4715		1337.61	14.7484
97	178.855	17.8655		15.0874	0.867778		97	1.88327	0.334036		0.0950337	0.171554		97	2319.74	215.542		2908.19	301.782		97	76.5079	15.7252		40.5848	14.8811		98	1082.7	12.9425		1310.23	17.7862
98	179.402	17.6808		15.0278	1.08512		98	1.96598	0.253248		-0.080376	0.163623		98	2336.09	215.542		2940.85	305.466		98	75.4652	15.897		40.4182	14.9301		99	1062.81	9.14851		1291.47	21.3081
99	179.501	18.0347		14.7695	1.24246		99	1.78302	0.176074		0.0527633	0.239267		99	2358.98	218.1		2961.88	307.971		99	74.3868	15.6		39.5193	14.6747		100	1046.86	10.149		1264.26	21.8504
100	179.42	17.6557		14.533	1.13428		100	2.06788	0.253507		-0.0526093	0.298004		100	2373.51	216.073		2978.32	309.443		100	72.9256	15.2172		39.0618	14.3532		101	1044.6	10.4739		1257.33	23.2636
101	179.683	17.6159		14.6927	0.850619		101	1.90255	0.232363		-0.021134	0.241874		101	2393.89	216.472		3008.81	309.238		101	72.924	15.4974		38.9999	14.5629		102	1025.49	8.73391		1247.12	21.6416
102	179.957	17.9661		15.2785	1.09565		102	1.50506	0.243752		0.044122	0.210724		102	2410.57	216.332		3023.96	311.457		102	71.1149	15.1566		38.0851	14.1817		103	1012.91	10.1041		1224.79	19.6618
103	180.242	17.924		14.1862	1.41942		103	1.60727	0.179643		-0.118638	0.255161		103	2431.71	216.599		3052.14	312.264		103	70.8162	14.9747		38.1958	14.1282		104	999.513	9.53387		1203.46	22.2968
104	180.683	17.8078		14.2475	1.94257		104	1.59456	0.205189		-0.125734	0.131438		104	2448.23	217.93		3085.35	315.492		104	69.6736	14.7246		37.4641	13.8098		105	984.559	7.56452		1191.13	28.3089
105	181.179	17.7441		15.3248	1.52657		105	1.46133	0.243126					105	2470.4	219.428		3108.69	314.337		105	69.6648	14.9505		37.4756	14.0503		106	972.035	10.5559		1175.71	22.2958
106	180.838	17.6731		14.7665	2.09281		106	1.84609	0.142635					106	2485.49	218.404		3133.1	315.515		106	68.0355	14.7423		36.8511	13.8251		107	959.418	10.5275		1157.26	20.7447
107	181.363	17.9624		14.9084	1.58401		107	1.64626	0.16888					107	2506.86	220.249		3149.7	316.247		107	67.2583	14.5641		36.3144	13.6477		108	944.812	9.40079		1140.47	19.0093
108	181.73	18.0735		15.2321	1.47499		108	1.19968	0.242463					108	2529.64	221.959		3165.55	315.661		108	66.6568	14.4946		35.9446	13.5353		109	937.776	10.021		1127.45	23.1483
109	182.087	17.8746		13.8646	1.88817		109	1.18243	0.559241					109	2539.2	219.395		3195.27	316.531		109	65.6733	13.8557		35.1478	13.0214		110	926.655	5.06919		1113.74	21.3981
110	182.436	17.7869		14.125	1.56421		110	1.18487	0.610567					110	2555.5	219.631		3221.89	318.694		110	64.483	13.6384		34.8969	12.8213		111	912.143	12.4416		1097.02	21.686
111	182.794	18.0048		13.791	1.45209		111	0.918267	0.554031					111	2579.74	218.772		3240.44	318.526		111	63.121	13.6626		34.0519	12.7666		112	899.825	8.3659		1082.21	19.5149
112	183.393	17.7978		14.0096	1.72754		112	0.631433	0.500518					112	2598.1	219.258		3268.28	321.3		112	62.9828	13.4732		34.1561	12.6028		113	880.997	11.4891		1061.38	21.9605
113	183.289	17.9364		14.7665	2.06514		113	1.39362	0.180974					113	2629.54	221.83		3285.14	321.323		113	61.8995	13.3865		33.6131	12.524		114	878.976	7.94275		1056.8	18.7495
114	183.941	17.8678		14.4121	2.09843		114	1.36611	0.165506					114	2624.08	218.841		3314.06	321.745		114	60.9816	13.0393		32.8648	12.1822		115	866.734	7.17857		1031.03	23.8526
115	183.158	17.5653		15.1903	2.25662		115	1.22676	0.210858					115	2651.46	220.586		3341.62	320.119		115	60.415	12.8372		32.7045	11.9788		116	851.538	12.1945		1016.05	20.2909
116	183.788	17.9335		15.1944	2.19225		116	1.31041	0.18655					116	2669.64	220.2		3376.77	321.719		116	59.3991	12.8221		32.2734	11.9906		117	847.041	7.73465		1004.11	22.1665
117	183.918	17.8099		14.7558	2.34725		117	1.43895	0.20944					117	2684.25	220.048		3385.07	324.17		117	59.1615	12.8754		31.952	12.0462		118	832.411	6.87547		986.309	19.5396
118	183.623	18.0019		15.0485	2.08836		118	1.22165	0.156503					118	2701.88	219.028		3408.37	324.521		118	58.0421	12.7499		31.8344	11.9093		119	821.79	8.95963		978.785	20.3223
119	184.464	18.115		15.3995	2.44065		119	1.209	0.21172					119	2722.87	220.356		3428.16	325.366		119	57.1006	12.2381		30.9889	11.4636		120	804.442	5.87603		965.952	21.4209
120	184.405	17.5333		14.2179	2.38333		120	1.24453	0.16838					120	2736.8	219.564		3437.38	320.465		120	56.8888	12.4421		30.7509	11.5906		121	804.588	9.75039		948.772	19.7565
														121	2760.46	221.683		3470.52	322.48									122	789.454	8.04752		939.735	19.4406
														122	2775.03	221.358		3490.86	323.776									123	779.97	8.69388		927.728	20.3341
														123	2786.18	220.569		3517.16	323.667									124	768.903	7.36732		915.572	22.6051
														124	2805.13	221.152		3528.4	327.266									125	759.566	7.7661		905.32	21.7409
														125	2822.09	220.759		3556.84	323.942									126	750.776	9.45841		891.807	27.2745
														126	2834.15	218.922		3581.32	328.496									127	739.317	5.42303		877.811	24.83
														127	2861.82	220.921		3607.51	325.255									128	729.19	5.81646		863.539	18.9774
														128	2863.93	218.824		3627.56	327.258									129	725.317	8.13019		856.967	22.2788
														129	2892.02	221.336		3649.57	326.328									130	707.687	10.6119		840.924	21.9577
														130	2905.81	219.986		3668.83	330.147									131	702.589	5.90311		831.763	18.2276
														131	2924.39	223.396		3703.52	330.614									132	691.336	8.79131		821.378	21.9219
														132	2937.98	221.404		3709.96	327.151									133	686.006	6.8059		807.682	19.4669
														133	2950.41	219.534		3727.45	327.983									134	672.083	8.12991		794.438	22.4797
														134	2969.87	218.739		3753.03	327.173									135	666.09	2.97764		786.498	15.9509
														135	2988.48	219.945		3780.28	328.75									136	658.781	5.91885		774.215	13.6329
														136	2999.51	217.617		3799.23	330.085									137	645.907	7.15224		758.04	17.6405
														137	3020.34	220.298		3823.5	332.402									138	639.626	9.11084		754.505	16.5788
														138	3032.02	217.637		3845.07	329.086									139	630.101	5.27441		740.772	17.8953
														139	3053.68	219.641		3851.97	325.772									140	622.321	7.3461		738.361	19.52
														140	3068.68	218.716		3882.09	329.962									141	614.547	3.04259		726.074	19.22
														141	3087.24	217.529		3903.03	326.535									142	605.435	7.11454		718.497	18.3491
														142	3094.04	218.727		3919.56	329.536									143	596.751	7.83697		709.66	19.825
														143	3119.42	218.41		3943.26	329.593									144	589.179	7.07486		693.087	19.9095
														144	3128.75	216.513		3952.25	330.308									145	580.095	6.92944		684.404	18.3344
														145	3156.06	218.088		3978.11	331.049									146	574.357	7.34612		681.659	18.1912
														146	3163.23	216.837		4000.07	330.484									147	565.957	6.12328		667.132	16.1265
														147	3180.25	216.955		4019.59	331.459									148	562.234	5.59754		661.125	14.9275
														148	3190.13	215.763		4042.36	331.466									149	551.814	6.08698		644.822	17.1735
														149	3206.32	215.833		4051.06	332.341									150	544.964	5.27066		642.296	17.092
														150	3226.89	216.245		4076.56	330.852									151	537.262	5.27835		633.61	14.2743
														151	3236.9	214.916		4101.7	333.443									152	535.207	4.52752		626.639	15.8818
														152	3251.97	214.105		4117.39	333.005									153	523.796	4.8459		613.869	15.9485
														153	3269.24	213.645		4135.46	329.471									154	521.292	5.15397		605.493	18.3552
														154	3290.31	215.162		4147.72	330.308									155	513.946	4.18602		597.961	15.3458
														155	3295.48	212.979		4175.71	328.744									156	508.221	3.28766		595.274	15.076
														156	3310.91	214.01		4201.36	333.129									157	499.531	2.77485		581.667	17.5786
														157	3327.01	213.602		4224.4	334.378									158	494.161	4.55427		573.034	16.1614
														158	3345.81	213.787		4241.54	331.95									159	485.903	4.51257		566.212	19.5889
														159	3355.22	211.013		4259.52	332.617									160	482.221	4.43098		561.519	15.7346
														160	3378.46	213.626		4273.91	328.88									161	475.746	3.50263		556.894	21.6233
														161	3390.18	212.549		4298.76	330.362									162	468.05	3.0937		551.039	15.3878
														162	3404.16	211.275		4312.49	329.674									163	461.356	4.64883		547.582	18.4032
														163	3411.4	211.411		4326.38	329.359									164	457.423	5.03701		532.271	16.0371
														164	3428	210.707		4341.94	330.149									165	447.028	3.80442		532.273	19.3587
														165	3448.23	210.107		4373.68	325.512									166	444.931	3.43009		517.525	18.452
														166	3469.05	212.607		4392.81	326.616									167	438.131	4.4451		515.745	16.4072
														167	3474.5	209.377		4408.49	329.539									168	431.006	2.65292		507.6	13.7306
														168	3482.35	209.014		4422.85	326.247									169	428.712	5.24749		503.555	15.6678
														169	3503	210.801		4442.62	326.932									170	422.5	4.43219		491.038	15.8526
														170	3519.48	208.897		4459.04	323.544									171	416.638	4.75033		488.239	14.1765
														171	3534.52	209.829		4475.94	323.423									172	411.694	2.19356		480.916	15.4605
														172	3542.84	209.725		4491.4	323.008									173	407.499	3.34651		478.247	16.8743
														173	3556	207.192		4521.38	325.48									174	400.627	3.06686		470.964	12.7027
														174	3572.62	211.466		4519.86	323.273									175	398.113	3.94746		465.871	12.9745
														175	3586.88	208.881		4543.83	320.271									176	394.764	4.7644		458.139	11.6541
														176	3601.11	211.284		4575.43	329.352									177	387.553	5.76331		451.633	13.6761
														177	3607.39	210.084		4587.48	323.645									178	382.411	5.0679		446.909	12.1887
														178	3624.96	209.057		4609.24	325.284									179	377.639	2.23359		432.333	13.012
														179	3643.81	209.727		4632.99	326.19									180	374.117	2.78545		429.786	11.3475
														180	3654.97	208.09		4638.89	323.354									181	368.017	1.88034		426.385	12.4097
														181	3666.92	209.144		4670.49	323.484									182	364.072	3.37248		419.353	11.3037
														182	3682.62	210.115		4684.67	323.901									183	361.598	3.82242		416.776	13.6725
														183	3695.09	207.581		4698.93	326.142									184	355.372	2.403		412.719	10.6263
														184	3712.43	207.258		4731.95	324.515									185	349.987	2.93918		402.767	12.3014
														185	3714.49	207.589		4741.06	323.123									186	346.47	2.46097		405.004	13.8301
														186	3728.38	204.922		4747.77	321.705									187	344.92	2.62716		399.829	13.0114
														187	3742.37	209.124		4768.91	325.575									188	339.164	3.9382		385.862	11.5463
														188	3760.73	208.253		4784.28	320.433									189	333.725	3.38733		385.478	14.3963
														189	3771.44	205.548		4807.99	324.197									190	330.415	1.56141		381.832	10.8321
														190	3784.3	205.167		4823.79	321.189									191	324.188	0.973076		375.94	15.6408
														191	3801.23	207.925		4854.08	321.788									192	322.506	4.51656		370.272	13.9626
														192	3811.03	207.485		4866.25	320.751									193	318.074	1.6444		367.963	11.9569
														193	3823.25	207.247		4879.5	323.312									194	313.839	4.12623		362.651	12.7745
														194	3841.11	208.017		4898.05	322.09									195	308.233	3.41029		358.441	13.2451
														195	3844.78	205.221		4908.63	319.706									196	305.29	1.8907		358.191	13.6155
														196	3864.64	207.309		4923.58	320.444									197	304.159	0.41552		350.225	12.4004
														197	3878.09	208.01		4946.12	319.056									198	298.365	1.23191		342.485	15.9372
														198	3881.94	208.373		4954.14	321.408									199	296.513	3.8711		340.359	12.2271
														199	3906.73	208.884		4979.85	319.568									200	294.75	3.36304		334.448	12.7918
														200	3911.06	207.227		4986.05	317.038									201	287.195	2.92312		333.109	11.3943
														201	3928.47	206.345		5012.17	318.739									202	284.117	2.58386		328.404	13.2936
														202	3934.34	204.776		5009.89	312.801									203	280.491	3.75417		324.073	16.1876
														203	3946.95	206.491		5017.41	317.147									204	276.568	2.49497		319.649	12.7323
														204	3954.92	206.811		5039.13	313.169									205	275.614	3.38082		316.692	12.7977
														205	3982.29	209.101		5069.53	315.05									206	272.495	1.33512		310.483	11.5663
														206	3987.17	206.839		5080.52	316.542									207	269.044	2.84048		311.003	16.227
														207	3989.79	205.347		5103.86	317.019									208	261.303	1.38557		301.427	16.5254
														208	3998.01	204.124		5118.5	314.029									209	263.099	2.67012		303.246	12.7783
														209	4011.17	205.126		5123.41	316.44									210	260.165	2.76028		298.33	16.0804
														210	4030.49	203.537		5139.88	316.699									211	255.525	0.831396		295.066	12.4309
														211	4037.32	204.915		5169.37	318.888									212	249.999	1.90533		292.296	10.3052
														212	4053.67	205.445		5191.37	321.08									213	247.985	2.10377		288.232	11.4797
														213	4067.02	205.995		5200.64	314.304									214	247.669	2.2786		288.442	11.8019
														214	4085.94	204.689		5201.26	315.783									215	242.982	3.44959		281.094	15.0288
														215	4086.7	201.997		5236.59	316.138									216	240.132	1.27496		278.793	12.3798
														216	4107.34	205.57		5242.06	314.379									217	237.491	1.70688		273.971	11.5632
														217	4109.69	201.621		5260.55	314.507									218	235.216	2.06993		270.639	12.6881
														218	4125.14	205.933		5274.67	319.354									219	233.538	0.822786		269.311	10.2181
														219	4140.28	205.146		5298.48	314.611									220	229.023	2.98141		265.814	12.2942
														220	4153.37	204.999		5302.26	315.8									221	227.586	2.59006		261.058	12.7643
														221	4168.4	203.841		5325.03	314.596									222	224.062	2.88389		258.44	11.3838
														222	4180.36	204.689		5344.14	316.895									223	221.524	1.48665		253.189	11.4053
														223	4187.55	206.415		5354.22	317.213									224	217.641	1.80384		254.62	10.9765
														224	4195.84	206.26		5371.93	316.415									225	216.434	1.86974		252.728	7.36293
														225	4213.56	207.433		5361.34	316.395									226	214.375	1.25799		247.696	9.90804
														226	4220.17	203.949		5390.71	310.742									227	211.113	0.569584		246.358	11.2574
														227	4236.74	205.969		5401.07	314.338									228	209.616	0.913664		245.291	11.182
														228	4237.25	202.024		5424.54	310.192									229	205.22	1.24692		235.298	10.1276
														229	4246.59	204.022		5430.91	314.411									230	205.653	0.863769		239.607	10.6963
														230	4261.3	203.289		5455.38	312.753									231	201.578	1.71901		234.477	7.85395
																												232	198.787	0.773724		235.829	10.4816
																												233	198.03	2.2737		230.169	8.57612
																												234	197.005	2.39669		226.825	9.34313
																												235	193.239	1.65284		223.465	10.541
																												236	189.8	0.549187		220.141	11.8911
																												237	189.994	2.11463		219.711	8.79384
																												238	186.114	1.82132		218.769	9.03582
																												239	185.253	1.94689		213.634	9.31231
																												240	181.646	2.46739		210.127	12.1198
																												241	179.726	2.23194		209.983	8.46032
																												242	177.026	1.67935		205.37	10.3631
																												243	175.031	2.5704		200.394	7.97725
																												244	174.375	2.50912		202.158	8.51843
																												245	170.971	1.64226		200.49	8.89354
																												246	169.617	1.20258		201.577	7.10987
																												247	169.142	0.276343		193.4	9.11633
																												248	166.052	0.854691		195.798	10.2584
																												249	163.177	2.59576		185.163	9.78415
																												250	161.813	1.04465		189.421	9.31789
																												251	159.757	0.313283		185.816	7.831
																												252	157.268	1.50353		183.553	11.0902
																												253	156.823	1.32621		181.46	10.028
																												254	157.379	0.610722		180.89	9.25762
																												255	154.438	1.42656		178.688	9.15216
																												256	152.99	1.00587		174.74	10.3691
																												257	150.698	0.893055		172.171	8.8861
																												258	149.421	0.610695		168.447	11.3702
																												259	145.656	1.07552		171.569	7.44993
																												260	146.286	1.35051		171.049	7.61359
																												261	145.513	0.959129		163.853	7.75336
																												262	142.205	0.458918		167.171	8.53524
																												263	139.836	0.774071		163.477	8.67425
																												264	140.027	0.232898		163.341	9.57827
																												265	136.31	1.45178		161.763	9.49942
																												266	135.842	0.646456		159.215	8.60954
																												267	134.88	1.28066		154.047	6.78203
																												268	133.283	1.55598		156.734	8.01936
																												269	131.943	0.540716		150.609	6.86077
																												270	129.803	0.968544		150.735	11.126
																												271	129.573	0.175139		151.561	8.95065
																												272	126.48	2.47769		146.158	9.18663
																												273	126.631	0.618304		145.218	8.03867
																												274	126.079	1.69031		146.052	8.93465
																												275	123.645	0.684864		142.324	6.70391
																												276	121.173	1.43689		138.464	5.00208
																												277	121.971	0.908016		138.382	7.79207
																												278	121.307	0.963498		138.328	7.07104
																												279	117.753	1.8421		137.319	5.51871
																												280	115.046	1.6432		135.146	4.57599
																												281	115.644	0.69418		132.756	8.67508
																												282	112.917	0.712587		128.109	5.27687
																												283	113.253	0.833311		130.227	7.05248
																												284	111.996	1.0471		127.082	6.76226
																												285	109.215	0.786487		124.007	9.29067
																												286	108.867	1.19497		121.531	8.42088
																												287	108.832	0.779115		123.764	7.03754
																												288	106.966	1.90115		120.148	5.97506
																												289	106.197	1.88514		120.899	7.50725
																												290	104.858	1.53758		117.636	7.239
																												291	103.768	1.28346		121.015	5.83122
																												292	103.698	1.13318		120.153	5.97295
																												293	101.244	1.29727		118.068	6.07111
																												294	98.8112	0.556919		115.028	5.93259
																												295	99.7752	1.58736		116.273	4.64173
																												296	98.3053	1.05398		113.68	5.48218
																												297	99.7436	1.60803		112.392	7.01049
																												298	97.1581	0.135142		110.678	4.97017
																												299	93.9654	0.488894		108.63	6.30769
																												300	93.6116	0.320512		113.06	4.62052
																												301	93.1212	1.18136		103.045	7.16285
																												302	93.5806	0.764562		102.404	4.52015
																												303	91.7474	0.656383		102.907	4.23722
																												304	90.494	1.07991		104.05	3.27527
																												305	87.8101	0.838051		102.742	4.57222
																												306	90.2655	1.34069		102.618	4.37936
																												307	86.5907	1.12989		97.2928	2.73267
																												308	85.4955	0.130642		100.513	4.07852
																												309	86.339	1.51332		101.155	0.781599
																												310	85.3606	2.18029		102.691	2.12285
																												311	84.4646	0.597467		94.543	5.06633
																												312	83.1713	0.975723		95.0766	3.4678
																												313	82.1977	1.04188		94.9513	4.30936
																												314	82.6266	0.301858		91.8099	3.58383
																												315	79.9761	1.40344		96.0803	5.69217
																												316	79.7864	1.44353		95.9442	4.15409
																												317	78.9942	1.36686		93.8646	4.62829
																												318	79.1087	1.21638		91.6548	4.42419
																												319	78.6201	0.893586		92.876	4.72035
																												320	76.2727	0.588939		90.3955	4.23817
																												321	75.9207	0.403334		90.0697	4.55148
																												322	75.8509	1.3246		87.4858	2.82636
																												323	76.055	0.624621		91.2661	4.02954
																												324	73.1611	0.501287		87.2405	5.5235
																												325	72.4762	0.891367		84.0123	4.68745
																												326	71.8755	0.749529		85.7598	4.93372
																												327	70.5708	0.636123		82.4404	3.60386
																												328	69.9068	0.721442		80.5637	3.40644
																												329	70.2737	0.956071		80.434	3.11075
																												330	69.4624	0.712877		81.9688	6.73109
																												331	69.398	0.544423		79.9297	4.65811
																												332	68.2615	0.494718		79.5405	6.2108
																												333	67.4896	0.959541		78.2281	5.94841
																												334	66.5089	0.866623		75.7242	3.73528
																												335	66.7761	1.85492		72.9198	8.60681
																												336	65.4303	1.09697		75.5174	5.57262
																												337	65.2495	0.515176		73.0881	3.66198
																												338	63.3292	0.666852		77.4911	5.1075
																												339	61.5568	0.457002		72.8003	1.2623
																												340	63.6591	1.21904		70.1267	4.14367
																												341	61.5664	0.917219		69.3405	4.24612
																												342	61.3701	0.321487		66.9453	4.07585
																												343	61.3767	0.647624		68.3568	4.28589
																												344	60.3041	0.931738		63.9571	2.67324
																												345	59.4158	0.435419		66.3737	4.58686
																												346	58.9117	0.318881		69.004	6.13066
																												347	58.4345	1.02376		65.0769	3.57075
																												348	57.3028	0.724247		62.8047	7.3937
																												349	57.5766	1.39687		58.0314	4.046
																												350	57.5778	1.2618		62.3462	3.72338
																												351	56.365	0.618558		61.8975	5.82611
																												352	55.3389	1.28894		61.6956	4.10713
																												353	54.817	1.02617		63.7874	5.7971
																												354	54.0892	0.0935519		55.05	6.19016
																												355	54.2323	1.43244		62.2852	5.48581
																												356	54.1381	0.236473		59.8306	7.7081
																												357	52.2166	0.6452		59.3687	7.4765
																												358	53.4043	0.298205		59.2097	7.79272
																												359	52.2613	0.774243		59.615	3.83976
																												360	51.2573	0.151425		56.5663	4.839
																												361	52.5972	0.524899		58.8639	4.22799
																												362	51.0133	0.587905		55.8977	6.73337
																												363	50.0493	0.597854		56.6131	5.76384
																												364	48.8347	0.294106		56.0674	5.64368
																												365	47.7585	0.593741		53.1304	8.59395
																												366	49.2075	0.774347		56.5878	6.4513
																												367	47.9387	1.16455		56.4746	4.99595
																												368	48.1928	0.558293		54.7169	4.721
																												369	46.4449	1.01848		55.5573	5.04524
																												370	46.0088	0.3481		53.8439	5.82956
																												371	47.6231	0.37636		55.9157	4.88254
																												372	46.7294	0.158009		51.9414	5.90474
																												373	45.4528	0.377101		56.3025	3.30218
																												374	44.2096	0.754181		53.8888	6.43532
																												375	45.4337	0.143852		55.5143	5.0131
																												376	43.7526	0.674028		53.0485	4.37554
																												377	42.7188	0.44415		48.4489	6.15313
																												378	44.5705	0.854513		51.8541	5.00632
																												379	43.5593	0.86681		52.3457	6.33746
																												380	42.6054	0.341652		49.7876	8.00316
																												381	41.818	0.426275		50.2836	7.30669
																												382	40.9423	1.33348		45.726	6.00883
																												383	40.9512	0.32292		44.6554	8.00523
																												384	40.2043	0.651906		45.941	7.75697
																												385	38.4755	0.181381		49.0297	7.52454
																												386	40.2628	1.47686		48.9961	7.94872
																												387	38.9963	0.949567		44.5511	8.16949
																												388	39.8714	0.426191		49.0424	4.06751
																												389	40.5831	0.456706		48.6542	2.07049
																												390	38.9933	0.619571		44.8744	5.97357
																												391	37.1768	1.01055		46.377	5.09006
																												392	38.0161	1.35028		41.6014	5.75321
																												393	38.4618	0.340521		42.3851	5.62335
																												394	36.8284	0.853428		42.3393	5.43157
																												395	38.0776	0.948743		41.6843	4.46621
																												396	35.7677	0.86716		38.2396	3.79062
																												397	35.6896	0.701452		39.1531	4.49002
																												398	36.4209	0.820988		39.2872	7.08627
																												399	35.652	0.209652		42.8411	4.1629
																												400	35.0304	0.243103		42.0257	5.09803
																												401	34.6563	0.793571		38.7926	4.49512
																												402	34.5794	1.38543		42.0715	4.80268
																												403	33.5479	1.19364		38.8458	5.3739
																												404	34.1409	0.74185		39.1618	5.59393
																												405	34.0824	0.936498		38.5771	4.87112
																												406	33.7722	0.488945		37.4748	6.3467
																												407	33.4585	0.673857		34.6763	2.08082
																												408	31.8585	0.61786		36.3229	4.18297
																												409	31.9712	0.862588		35.1245	5.98779
																												410	31.0859	0.393053		38.819	5.34899
																												411	31.9205	0.690428		35.2279	4.6721
																												412	30.3927	0.488422		38.5878	3.98816
																												413	30.5908	0.265504		39.8217	4.66874
																												414	30.144	0.215495		39.8115	6.27605
																												415	29.5558	0.719492		37.4768	4.40719
																												416	29.7819	0.783645		37.1895	6.09244
																												417	29.4436	1.30844		35.7049	6.61003
																												418	28.7057	0.714395		37.2978	5.56926
																												419	28.8351	0.462957		36.019	6.16409
																												420	29.3422	0.451538		34.7168	3.91898
																												421	28.5524	0.427427		37.627	5.11142
																												422	28.3149	0.764137		36.1117	6.79082
																												423	28.4879	0.458143		34.8153	3.30387
																												424	27.6987	1.24028		32.9425	4.6337
																												425	26.3839	0.692166		32.0739	4.61757
																												426	26.1733	1.40234		32.388	3.87554
																												427	26.3905	0.672608		30.9566	5.75713
																												428	27.0771	1.0112		33.6946	7.2868
																												429	25.4658	0.434404		33.7765	4.65522
																												430	24.312	0.791641		27.8967	5.44615
																												431	25.4169	0.644123		35.1914	4.19859
																												432	24.5304	0.898524		31.1473	6.96683
																												433	25.4729	0.645507		29.8017	5.45832
																												434	24.661	1.4029		29.2569	6.87978
																												435	24.046	0.78652		33.2625	4.01337
																												436	23.9517	0.879469		29.0808	8.2036
																												437	24.0006	0.743836		29.9841	8.60758
																												438	23.4882	0.370236		31.1599	6.53921
																												439	24.2989	1.06487		33.3995	8.63102
																												440	22.1501	0.64438		33.0484	5.38016
																												441	22.4842	0.182025		30.7395	3.44186
																												442	22.594	0.561999		31.0731	4.42679
																												443	21.692	0.0931216		28.1312	3.95014
																												444	22.3219	0.933952		32.7445	4.41283
																												445	22.3822	0.98008		27.3231	6.191
																												446	22.4764	1.04576		31.6867	4.84066
																												447	20.6086	1.13712		27.4489	6.64054
																												448	21.0704	0.917512		30.8156	6.11775
																												449	19.5951	0.27162		28.2951	2.82842
																												450	20.2358	0.382509		26.3813	7.40573
																												451	20.0461	0.609965		23.2683	5.43404
																												452	19.959	0.653256		30.1909	4.13877
																												453	20.7983	0.814097		28.7082	3.74629
																												454	18.9615	1.39205		27.9932	4.76705
																												455	18.8345	0.549654		26.5315	3.36188
																												456	18.9597	0.912324		24.2969	5.47212
																												457	18.5601	0.492133		25.7771	6.05408
																												458	18.3698	0.385624		26.2136	4.00555
																												459	17.2524	0.140239		23.8257	5.05397
																												460	19.1524	0.388887		24.2793	4.10585
																												461	18.2564	0.992415		23.3853	3.47713
																												462	17.2631	0.796805		24.6387	3.59671
																												463	16.7984	0.694044		25.0455	3.87701
																												464	16.4996	0.519711		23.1385	5.36659
																												465	16.5359	0.390099		22.446	3.89221
																												466	17.3317	1.18747		22.6201	4.22118
																												467	17.4451	0.337644		23.9657	3.52189
																												468	16.9535	1.06353		24.3105	2.9196
																												469	17.5328	0.687966		24.4115	4.64003
																												470	14.865	0.735757		18.8906	3.97533
																												471	15.6238	1.45751		18.3677	4.04108
																												472	16.2204	0.415348		20.7961	3.9057
																												473	15.5886	1.2725		21.6369	3.01531
																												474	15.2343	0.870097		18.9944	4.68287
																												475	15.1478	0.881376		21.5866	3.30335
																												476	15.69	0.926751		18.3877	2.17854
																												477	15.0296	0.540445		22.5235	0.541867
																												478	14.5798	1.09392		19.6494	4.29576
																												479	15.2993	0.9263		19.5743	1.62741
																												480	14.1628	1.52237		21.5554	1.29272
																												481	13.4816	0.875383		21.057	1.00112
																												482	14.2326	1.45302		21.0501	3.28334
																												483	13.2453	0.90861		22.999	4.25928
																												484	12.4477	1.39565		19.5924	4.59679
																												485	13.7244	0.873368		20.0128	5.27847
																												486	13.6259	0.562613		20.083	2.28956
																												487	12.2467	0.533938		20.0464	0.929673
																												488	12.2807	0.410522		17.9571	2.18549
																												489	12.2539	1.02236		14.8655	3.78179
																												490	12.199	0.502295		16.0267	3.32742
																												491	12.7043	0.368601		16.0623	3.88369
																												492	11.8017	1.27212		16.2652	5.52245
																												493	11.7802	0.918414		17.3357	6.01017
																												494	11.2648	1.28961		18.6052	3.54205
																												495	11.1807	0.857045		14.1076	6.77591
																												496	10.7899	0.495826		14.7689	5.30212
																												497	11.6627	1.11776		13.8218	5.82979
																												498	11.6967	0.441593		16.394	3.78229
																												499	10.0639	0.769168		16.6778	3.21799
																												500	11.0685	0.836336		15.7604	4.06846
																												501	10.5227	1.2265		17.7283	4.30848
																												502	11.1055	0.405213		15.6687	1.31949
																												503	10.0573	0.0343532		12.742	1.0833
																												504	10.9951	0.932547		19.3495	2.50855
																												505	9.87121	1.30355		14.0378	2.27785
																												506	10.281	1.02296		13.1199	3.27663
																												507	9.35579	1.27906		15.1678	2.18935
																												508	9.57473	1.29723		15.7697	2.16969
																												509	8.36968	1.45409		13.6657	2.58916
																												510	10.0919	0.667076		15.7638	2.12092
																												511	9.64751	0.806206		9.49966	2.13422
																												512	8.17043	0.936712		12.2089	3.09654
																												513	8.4353	1.13941		12.2889	2.36818
																												514	9.1631	0.938994		13.04	1.58238
																												515	7.00596	0.394736		13.3302	3.69173
																												516	8.22353	0.578196		18.0346	4.08661
																												517	8.2623	0.977638		10.7828	3.69985
																												518	8.78966	1.30841		15.9628	3.17117
																												519	8.13822	1.45083		8.73736	3.46666
																												520	7.43786	1.8364		12.9083	3.88116
																												521	8.06962	1.86419		11.451	3.08944
																												522	8.22353	0.577524		14.2505	1.82053
																												523	7.02684	0.751071		12.9156	4.55884
																												524	6.79179	1.00424		11.7778	2.9033
																												525	7.26427	2.18997		13.6847	5.50598
																												526	6.02223	1.10262		10.7965	3.24139
																												527	6.83176	0.731852		12.364	3.07659
																												528	7.87275	0.919775		11.0496	2.85434
																												529	5.82299	0.73151		9.31921	0.843042
																												530	5.18706	1.414		9.92494	2.48736
																												531	6.16183	1.19262		12.5245	2.75398
																												532	5.67743	0.892438		11.2603	5.11311
																												533	6.13618	1.37426		9.68499	2.02464
																												534	6.45056	1.43843		7.58246	3.32736
																												535	5.77407	1.63206		7.29617	6.33285
																												536	5.80568	1.07323		9.24361	6.04169
																												537	4.63345	0.851922		8.74029	4.43579
																												538	5.58436	0.625813		9.48844	4.94599
																												539	4.64121	1.00225		10.3692	3.96844
																												540	4.83568	1.25359		5.77646	3.2406
																												541	4.84762	0.914579		12.3738	2.58286
																												542	3.33773	1.13046		9.70108	5.46399
																												543	4.90369	0.946843		13.6867	5.25135
																												544	4.68595	1.84418		7.40884	6.51467
																												545	4.69609	1.61963		7.74487	6.63568
																												546	3.99573	1.48433		9.53965	5.46105
																												547	3.19694	1.77919		8.03262	5.87929
																												548	2.95355	1.18756		8.31598	3.78822
																												549	3.99991	1.17762		12.0611	4.95704
																												550	3.70402	1.75258		9.83618	4.7016
																												551	3.43318	0.977227		7.36202	5.29169
																												552	2.46079	1.05386		9.1212	2.34196
																												553	2.83782	1.78519		7.88631	6.11548
																												554	3.64913	1.32198		6.84114	5.49813
																												555	3.67837	0.419996		5.50725	6.13855
																												556	1.90361	1.91941		7.66293	4.88467
																												557	2.97025	0.910914		6.2432	4.36989
																												558	2.91358	1.62672		3.20768	5.54711
																												559	2.13806	0.949837		5.26193	5.15635
																												560	1.96864	1.5233		5.48969	3.42674
																												561	1.77654	1.72395		4.64741	7.2031
																												562	0.937786	1.40325		3.63394	5.3803
																												563	2.42202	1.39748		5.57065	6.38308
																												564	1.83799	1.31616		4.66204	5.85212
																												565	2.05454	1.27544		3.35302	6.96842
																												566	2.05394	1.3095		8.02531	6.49864
																												567	1.0398	1.70417		5.05611	4.98837
																												568	1.2301	0.687033		-0.51795	4.4157
																												569	1.74851	0.707158		3.36083	6.55274
																												570	1.11735	1.65011		3.21012	2.85211
																												571	0.999232	1.02432		7.2357	8.25753
																												572	1.77714	0.387104		4.75081	5.89561
																												573	0.838758	1.76019		-1.97084	7.73065
																												574	1.09289	0.767652		1.95329	4.14149
																												575	0.459348	0.94901		6.91478	3.27869
																												576	0.543462	1.52471		3.61541	5.5427
																												577	0.623401	1.42417		4.50841	6.65281
																												578	0.286347	1.86998		5.60528	5.54031
																												579	-1.15195	0.751549		3.61005	3.0611
																												580	0.335265	0.635767		1.70163	4.50284

## Sheet: 2-SD2
ATPase Figure Source Data
Figure 2F					Figure 2G
[X] (mM)	Mean	SEM	N		[X] (nM)	Mean	SEM	N
0	0.610609	0.736814	12		0	1.70229	2.92189	3
0.05	1.03058	1.3776	6		5	6.0197	3.64786	3
0.125	2.01357	1.61212	6		10	7.3351	3.122	3
0.25	2.28045	1.88197	6		25	17.8547	4.74709	3
0.375	4.64561	1.90563	6		50	32.3444	2.73263	3
0.5	7.79321	2.18103	6		100	48.5292	3.69724	3
1	34.0794	2.27885	6		250	76.6794	4.37611	3
2.5	70.4589	2.14499	12		500	125.785	4.3949	3
3.75	75.2053	1.88899	6		1000	131.83	3.54198	3
5	85.4856	1.23942	12		2500	123.617	4.07633	3
10	87.1239	1.71799	6
[X] is the concentrations of the parBF variants used.

## Sheet: 2-2-SD1
Figure 2-figure supplement 2-Source Data 1
	ParA			ParB
	N=11			N=12
Time (s)	Average	SEM		Average	SEM
0	0.21669	0.00774669		0.32022	0.00598585
1	0.275505	0.00763449		0.435188	0.00970536
2	0.312463	0.00826984		0.516856	0.010916
3	0.340839	0.00695804		0.578016	0.0121114
4	0.367833	0.00776447		0.631754	0.0132076
5	0.394239	0.00753568		0.667648	0.0120564
6	0.412577	0.00715486		0.701087	0.0115718
7	0.43492	0.00737534		0.726073	0.0126214
8	0.453605	0.00770048		0.748117	0.0117342
9	0.474171	0.00729611		0.767523	0.0101417
10	0.493112	0.00809907		0.780113	0.010733
11	0.507111	0.00880544		0.799116	0.0105716
12	0.526713	0.00764933		0.812281	0.0106824
13	0.537597	0.00675947		0.822005	0.0100982
14	0.553013	0.00701369		0.829787	0.0105204
15	0.569137	0.00704403		0.84006	0.0104468
16	0.583895	0.00683872		0.84768	0.00923071
17	0.592664	0.00708825		0.853262	0.00907029
18	0.612153	0.00725638		0.861327	0.00928347
19	0.621592	0.00653263		0.86591	0.00877551
20	0.635404	0.00706208		0.873388	0.00869707
21	0.644838	0.0083989		0.87622	0.00819303
22	0.654919	0.00664974		0.882918	0.00810999
23	0.669356	0.00691377		0.883866	0.00792753
24	0.674577	0.00749676		0.891185	0.00831649
25	0.688576	0.00589716		0.894143	0.00730714
26	0.700113	0.00640238		0.895664	0.00795068
27	0.705831	0.00547827		0.899871	0.00775726
28	0.715991	0.00764992		0.902039	0.00896905
29	0.722438	0.00546012		0.905579	0.00843149
30	0.728836	0.00806468		0.912995	0.00759291
31	0.734581	0.00414318		0.910973	0.00770059
32	0.745364	0.00633568		0.917219	0.00825011
33	0.754274	0.0065136		0.919277	0.00744839
34	0.75995	0.00667414		0.921168	0.00797193
35	0.766929	0.00638447		0.921306	0.00779326
36	0.774196	0.00753624		0.925165	0.007264
37	0.780703	0.00596053		0.930747	0.00755456
38	0.789837	0.00647481		0.931063	0.00839237
39	0.789742	0.00562181		0.932174	0.00765399
40	0.798737	0.0051165		0.932757	0.0078307
41	0.803369	0.00620695		0.942473	0.00783949
42	0.806251	0.0059775		0.941671	0.00807567
43	0.811242	0.0057326		0.937269	0.00743381
44	0.821994	0.00554118		0.941835	0.00757054
45	0.826641	0.00647238		0.943026	0.00681409
46	0.829204	0.00646453		0.942914	0.00652564
47	0.839347	0.00611263		0.946721	0.00737059
48	0.842754	0.00543446		0.949702	0.00797456
49	0.845061	0.00758121		0.951145	0.00655625
50	0.851174	0.00652749		0.954131	0.00608453
51	0.849781	0.00777546		0.95176	0.00608606
52	0.852762	0.00507441		0.955405	0.00642766
53	0.858305	0.00448812		0.95641	0.00737376
54	0.863022	0.00622396		0.955009	0.00597311
55	0.860779	0.00479047		0.959624	0.00648255
56	0.866692	0.0051036		0.964898	0.00507174
57	0.871462	0.00555817		0.962571	0.00488909
58	0.877991	0.00522		0.963326	0.0061017
59	0.879684	0.003884		0.95972	0.00721751
60	0.879926	0.00528904		0.963538	0.00560018
61	0.886272	0.00608612		0.96639	0.00575959
62	0.888054	0.00530815		0.970426	0.0063811
63	0.889356	0.00504153		0.966972	0.00698706
64	0.899255	0.00600708		0.96986	0.00668959
65	0.892624	0.00418536		0.972384	0.00709203
66	0.897794	0.00462493		0.971287	0.00701107
67	0.901652	0.00427559		0.973106	0.00643008
68	0.90645	0.00424135		0.972936	0.00505206
69	0.906537	0.00596399		0.976319	0.00562583
70	0.907832	0.005221		0.976879	0.0059813
71	0.909968	0.00469914		0.97131	0.00688451
72	0.908018	0.00414007		0.973965	0.00618925
73	0.918607	0.00461168		0.977	0.0056635
74	0.918172	0.00380609		0.978074	0.00618232
75	0.915507	0.00419566		0.97898	0.00605696
76	0.924037	0.00454575		0.978643	0.00586886
77	0.920682	0.0044897		0.978133	0.00522938
78	0.927946	0.00383497		0.984364	0.00658842
79	0.927518	0.00451462		0.983848	0.00446365
80	0.931129	0.00452287		0.98488	0.00653784
81	0.925904	0.00682911		0.98476	0.00446528
82	0.93212	0.00359971		0.983123	0.00549902
83	0.931324	0.00514255		0.982336	0.00412367
84	0.936651	0.00382191		0.985079	0.00545199
85	0.940991	0.00408754		0.98885	0.0043723
86	0.938208	0.00428724		0.986605	0.0055557
87	0.943462	0.00480619		0.987888	0.00579895
88	0.940049	0.00401239		0.988529	0.00563309
89	0.943701	0.00605565		0.983704	0.00471954
90	0.942713	0.00413497		0.985974	0.0049189
91	0.943783	0.00414413		0.987962	0.00521625
92	0.949426	0.00437961		0.985889	0.00533034
93	0.94261	0.00505354		0.986443	0.00534978
94	0.948375	0.00550874		0.988588	0.0038416
95	0.950038	0.00436937		0.987658	0.00508521
96	0.955709	0.00299086		0.991234	0.00392725
97	0.952171	0.0055659		0.991933	0.00456981
98	0.955293	0.00360455		0.989838	0.00501001
99	0.959359	0.00327214		0.986476	0.00346006
100	0.960555	0.00422397		0.987172	0.00486343
101	0.963418	0.00295959		0.991388	0.00394743
102	0.961143	0.00452868		0.990489	0.00476678
103	0.956275	0.0037271		0.992237	0.00453387
104	0.959946	0.00499565		0.990997	0.00445361
105	0.960416	0.00396687		0.990944	0.00395174
106	0.966682	0.00411078		0.989037	0.00514542
107	0.95481	0.00574011		0.991009	0.0029179
108	0.965534	0.003984		0.99108	0.00431613
109	0.965406	0.00383074		0.988845	0.00379934
110	0.966858	0.00434618		0.992234	0.00503264
111	0.963979	0.00372242		0.994752	0.00320926
112	0.963044	0.00401661		0.994691	0.00353264
113	0.972541	0.00340918		0.988931	0.00344636
114	0.970111	0.00412045		0.992832	0.00379652
115	0.968765	0.00296881		0.991384	0.00425629
116	0.974121	0.00375237		0.990224	0.00328324
117	0.971695	0.00364028		0.991311	0.00420329
118	0.970526	0.00201588		0.994372	0.00447614
119	0.970495	0.00297436		0.993407	0.00356249
120	0.971637	0.00384369		0.993881	0.00313358
121	0.975148	0.00377781		0.992837	0.00383015
122	0.9756	0.00313951		0.995164	0.00320461
123	0.974428	0.00296965		0.996209	0.00315412
124	0.97736	0.0028639		0.995722	0.00319882
125	0.974435	0.00345168		0.995836	0.00305688
126	0.977544	0.0048376		0.992545	0.00275938
127	0.979745	0.00406281		0.99689	0.00323424
128	0.977266	0.00414204		0.995987	0.003379
129	0.972767	0.00303768		0.991613	0.00472097
130	0.980194	0.00468976		0.995362	0.00314964
131	0.979836	0.00348364		0.993872	0.00283214
132	0.980602	0.00370366		0.994724	0.00358476
133	0.979366	0.00380789		0.998701	0.00222887
134	0.98359	0.00403057		0.99289	0.00227472
135	0.980489	0.00349236		0.994073	0.00349909
136	0.983617	0.00482071		0.993609	0.00347586
137	0.981353	0.00373669		0.993439	0.00296174
138	0.983628	0.00380143		0.996592	0.00268732
139	0.982393	0.0046204		0.996397	0.00314769
140	0.98141	0.00283242		0.989657	0.00235459
141	0.984536	0.00361379		0.998032	0.00250335
142	0.98568	0.00249479		0.997065	0.00194572
143	0.988746	0.00375968		0.995455	0.00238318
144	0.988535	0.00283924		0.998352	0.00368895
145	0.988098	0.00330757		0.996175	0.0019606
146	0.98874	0.00401732		0.993896	0.00217984
147	0.986933	0.00259057		0.997971	0.00289698
148	0.989033	0.00188038		0.99659	0.00254509
149	0.985417	0.00417421		0.999241	0.0036229
150	0.986423	0.0019346		0.996746	0.0032213
151	0.986575	0.00384648		0.999502	0.00242735
152	0.992927	0.00243958		1.00079	0.00196067
153	0.987975	0.0030761		1.00093	0.00257304
154	0.988938	0.00311152		0.998071	0.00236704
155	0.993418	0.00370055		0.995734	0.0011654
156	0.988519	0.00297139		1.00088	0.00228433
157	0.996805	0.00308621		1.0004	0.0023443
158	0.993048	0.00230852		1.00058	0.00244096
159	0.998769	0.00283386		1.00087	0.00213845
160	0.991176	0.0041303		0.999213	0.00256532
161	0.994709	0.00322791		0.995965	0.00184515
162	0.992951	0.00479539		0.997949	0.00247861
163	0.997273	0.00442136		0.996932	0.00180547
164	0.993329	0.00491342		0.999654	0.00220769
165	0.996715	0.00331034		0.999677	0.00223789
166	0.995334	0.000583877		0.996804	0.00185003
167	0.99612	0.00247189		1.00088	0.00165603
168	0.999404	0.00246762		1.00327	0.00223844
169	1.00382	0.00261249		1.00285	0.00199861
170	1.00248	0.0024925		1.00281	0.00156381
171	1.00191	0.00286535		0.99834	0.00234866
172	1.00189	0.00322373		0.998065	0.00190505
173	1.00074	0.00169226		1.00276	0.0021071
174	0.999564	0.00228765		0.996523	0.0014496
175	0.998729	0.00323644		0.997692	0.00192144

## Sheet: 2-4-SD1
Figure 2-figure supplement 4-Source Data 1
panel B
[X] (mM)	mean	SEM	N
0	8.796	3.895	2
0.005	12.398	3.722	2
0.01	16.516	3.735	2
0.025	24.038	3.761	2
0.05	35.338	2.969	2
0.1	56.609	4.549	2
0.25	85.183	7.704	2
0.5	117.591	9.454	2
1	128.488	3.516	2
2.5	126.236	4.94	2
[X] is the concentrations of the parBF variants used.

## Sheet: 3-SD1
Figure 3A				Figure 3B							Figure 3C
	ParA	ParB1-42R36A			ParA			ParB				ParA			ParB
	N=1	N=1			N=9			N=9				N=9			N=9
Time (s)				Time (s)	Average	SEM		Average	SEM		time (s)	Average	SEM		Average	SEM
				0	483.773	6.42529		423.438	4.67229		0	420.497	20.4804		222.28	32.4963
1	70.3641	16.2694		1	461.942	8.81586		424.936	5.31282		1	300.75	32.0108		106.099	21.9271
2	226.944	49.0497		2	443.646	10.0417		413.469	11.8193		2	191.784	26.093		42.6463	9.82083
3	140.173	55.1248		3	432.584	11.862		401.461	11.5869		3	118.794	16.1468		18.1687	3.60576
4	83.0535	59.4954		4	420.005	12.0111		388.246	10.3869		4	78.9454	9.35222		8.91631	1.36813
5	105.312	74.0083		5	403.521	12.8241		372.365	10.8256		5	61.4413	6.26473		7.88568	2.32541
6	118.705	89.3192		6	387.574	13.547		355.982	13.0751		6	51.6703	5.58793		8.81425	4.48148
7	132.749	108.74		7	379.962	14.9128		341.933	12.0977		7	43.7066	3.54762		6.39714	1.91313
8	161.062	145.376		8	369.048	15.5651		331.727	11.0788		8	37.9057	3.25061		3.86091	0.495894
9	175.458	151.328		9	352.786	16.445		330.858	13.3283		9	36.9309	4.18358		3.83769	0.516269
10	173.572	148.835		10	347.753	17.241		312.067	17.7643		10	30.8766	2.32282		3.15921	0.541398
11	200.202	182.368		11	336.835	18.0332		305.601	15.8238		11	30.8792	3.40939		2.86835	0.403493
12	193.792	194.775		12	329.937	19.398		288.086	14.8253		12	29.6335	4.14702		2.72557	0.345181
13	228.928	198.065		13	317.411	19.6484		286.156	16.5456		13	29.8456	3.72395		3.24981	0.469172
14	248.122	204.13		14	312.119	20.3482		277.187	16.6238		14	26.7647	3.5614		2.26942	0.327613
15	239.872	227.234		15	300.143	20.3226		268.88	15.8679		15	24.9835	2.95645		2.37476	0.36082
16	240.074	226.849		16	292.41	20.4333		262.313	16.0145		16	26.4533	3.92644		2.32218	0.569695
17	274.694	239.716		17	285.897	20.8389		253.759	17.9251		17	23.7759	2.79409		2.31425	0.399573
18	270.096	251.049		18	276.979	20.5421		247.776	17.3332		18	23.469	3.72572		2.00314	0.295199
19	292.633	271.414		19	273.231	21.5812		245.099	16.2583		19	21.2069	1.94969		2.15236	0.313394
20	302.61	268.647		20	263.456	21.3192		232.671	19.517		20	22.9126	4.26926		2.01346	0.238246
21	298.038	262.466		21	258.077	21.9895		231.675	19.5077		21	22.5555	3.50149		2.3369	0.507598
22	306.851	269.192		22	251.961	22.626		219.668	18.7011		22	18.7081	2.58206		1.47273	0.283502
23	317.556	291.039		23	243.986	23.0406		217.682	17.4336		23	21.4487	3.06723		2.3615	0.486252
24	339.53	290.303		24	238.576	23.1912		212.008	19.5057		24	18.4315	2.04311		1.87168	0.376817
25	316.219	308.668		25	232.227	22.1563		204.911	17.2916		25	20.626	2.99419		2.6016	0.496194
26	351.966	306.714		26	228.8	23.2284		196.282	19.6388		26	19.8522	2.98102		2.34575	0.417465
27	337.969	321.384		27	220.079	23.49		186.152	18.5792		27	21.2103	4.11379		2.27773	0.400141
28	343.453	312.509		28	215.624	23.6704		188.844	18.1513		28	16.6377	2.6813		2.21573	0.437752
29	361.679	328.551		29	211.13	23.5096		182.94	19.1133		29	15.7715	1.58874		1.67285	0.297736
30	352.105	317.974		30	208.496	23.8283		179.923	19.3888		30	16.8799	2.66559		2.01513	0.40605
31	361.674	337.353		31	201.826	22.9495		170.104	19.9187		31	16.8377	2.6783		1.7507	0.363097
32	356.512	327.969		32	194.281	22.3015		173.354	19.5471		32	13.6837	1.29061		2.34428	0.679277
33	377.209	338.469		33	191.78	23.024		165.753	18.8963		33	16.4984	2.89278		2.14297	0.458222
34	382.162	346.2		34	187.848	22.5147		162.197	17.6927		34	13.9611	1.84795		1.52463	0.364572
35	407.516	355.55		35	182.223	23.3769		157.763	19.5224		35	16.9655	3.28415		1.9002	0.32738
36	380.509	346.575		36	180.096	23.3889		154.372	19.3806		36	14.4926	1.86927		1.80444	0.324824
37	390.517	350.984		37	172.567	22.2997		145.117	19.7831		37	15.3827	3.25444		1.39656	0.209685
38	425.088	370.82		38	171.93	23.3227		144.012	18.5844		38	13.0257	1.51469		1.83427	0.503748
39	401.271	379.114		39	167.12	22.6595		144.562	18.199		39	14.563	2.54598		1.93042	0.536832
40	393.858	364.319		40	163.666	22.5178		140.2	17.824		40	15.7543	3.34335		1.74833	0.445693
41	408.993	355.547		41	159.558	22.5035		135.545	18.9843		41	14.2251	2.78624		1.4888	0.263847
42	413.77	377.352		42	156.339	22.4519		133.754	19.4629		42	11.0506	1.79443		1.70076	0.568758
43	419.695	368.013		43	153.719	22.8636		133.539	17.6326		43	14.5611	3.55051		1.66179	0.447245
44	401.776	363.815		44	151.595	22.655		121.902	17.2418		44	11.5441	1.60025		1.31906	0.347395
45	408.449	372.899		45	146.635	22.881		127.413	19.5709		45	11.2423	1.84105		1.77669	0.570886
46	402.435	385.128		46	144.129	22.5351		115.96	17.6112		46	11.1811	2.02065		1.44374	0.404858
47	419.808	372.985		47	140.911	22.4477		117.641	18.8497		47	11.0859	2.21943		1.86678	0.568436
48	403.814	383.998		48	139.461	22.2159		115.691	17.6195		48	14.113	3.43792		1.43441	0.426854
49	416.64	385.371		49	135.628	22.3864		116.37	17.7243		49	9.44293	1.09073		1.19139	0.304168
50	418.452	386.67		50	133.731	22.4057		113.596	17.2559		50	10.5495	2.43643		1.38115	0.424451
51	432.741	409.152		51	129.588	21.7769		109.661	16.6564		51	10.664	2.14362		1.38157	0.430422
52	436.608	407.091		52	126.52	21.5909		103.684	17.2105		52	9.76033	2.58258		1.52244	0.530147
53	426.603	406.978		53	125.216	21.9458		102.915	16.8365		53	9.35843	1.98921		0.793637	0.419746
54	443.504	409.009		54	123.644	21.828		101.683	17.1539		54	12.0347	3.01795		1.40648	0.298251
55	472.636	398.546		55	120.491	21.6195		95.5879	17.5553		55	9.76144	2.16155		0.867149	0.267327
56	445.024	393.839		56	117.001	21.0932		95.2801	17.3304		56	8.5723	1.30127		1.46399	0.411699
57	466.754	406.804		57	114.395	20.5243		90.7411	15.7764		57	8.11059	1.45976		1.01244	0.205462
58	422.293	390.839		58	113.928	20.7493		88.8856	16.9323		58	9.72414	2.10639		0.616285	0.224849
59	480.37	377.473		59	111.598	20.5316		87.65	15.8346		59	9.39473	2.06487		0.576606	0.279121
60	471.31	380.425		60	109.269	20.0965		87.1435	16.4034		60	11.1238	2.83274		1.27083	0.311282
61	453.279	393.562		61	106.223	20.3984		83.7152	15.9741		61	8.53371	2.17156		0.892151	0.41751
62	468.932	390.591		62	104.251	19.6763		82.0378	15.5032		62	8.76965	2.60044		1.2345	0.436911
63	431.17	406.247		63	102.39	19.8592		79.205	15.2273		63	9.31959	1.8986		1.20549	0.381638
64	421.094	395.226		64	99.9026	19.1045		75.2297	16.7916		64	8.45378	2.57207		1.17301	0.432273
65	443.524	405.768		65	99.2116	19.5321		76.4307	15.7672		65	6.89801	1.30621		0.899022	0.440335
66	460.974	396.966		66	97.7213	19.2828		78.2215	14.7409		66	10.0267	2.81158		1.05464	0.323518
67	465.789	399.841		67	94.982	18.894		75.4927	14.7233		67	9.13632	2.4871		1.01067	0.267141
68	454.048	404.682		68	93.4811	19.1685		69.8383	16.2898		68	10.8892	2.85114		1.40439	0.3854
69	447.716	418.428		69	92.8972	18.7321		69.9363	14.6722		69	7.38478	1.65425		0.213133	0.345429
70	470.522	410.089		70	90.7485	18.3014		71.3193	14.4918		70	6.65427	1.36063		1.10612	0.391511
71	450.082	401.227		71	88.3965	18.4389		67.9736	14.0479		71	10.1627	2.78086		1.08641	0.385376
72	465.005	408.058		72	87.3437	18.633		66.428	13.6994		72	9.81788	2.73963		1.07775	0.474674
73	464.198	402.014		73	85.0923	17.8021		65.2575	14.2206		73	9.70973	3.19924		0.96577	0.288321
74	467.787	419.78		74	83.0843	17.6992		62.1628	14.3213		74	6.51445	1.51148		0.735942	0.159305
75	443.803	388.79		75	81.8851	16.8564		66.5765	13.2428		75	6.43707	1.29507		1.04996	0.400031
76	444.752	409.567		76	80.3668	17.3142		57.2134	14.2946		76	8.06624	3.1471		0.960452	0.177847
77	458.732	415.219		77	79.0417	17.3579		58.1414	12.7173		77	5.23433	1.22234		1.03523	0.29738
78	462.639	426.893		78	77.0542	16.8534		57.3618	13.9627		78	8.54429	2.60603		0.450828	0.148048
79	435.545	406.791		79	76.327	16.9683		54.5584	13.6299		79	8.82872	3.78539		0.581692	0.219691
80	442.522	416.862		80	74.5116	16.8472		56.4622	12.6276		80	11.0708	4.58383		0.768063	0.25367
81	473.194	407.054		81	73.6843	17.0192		52.5809	14.502		81	11.2444	3.99969		1.30947	0.410358
82	465.019	411.306		82	72.5696	16.9848		52.5999	12.6326		82	11.1673	4.13203		0.760979	0.475368
83	466.246	424.018		83	70.7399	16.766		51.9823	12.9901		83	10.9755	4.20256		1.34081	0.330027
84	483.943	417.271		84	69.8982	15.9663		51.0004	12.5175		84	7.97849	2.69745		0.463317	0.285991
85	469.745	411.397		85	69.0689	16.2617		47.1461	13.8234		85	10.2261	4.34227		1.54425	0.323564
86	471.826	412.211		86	66.7339	15.7583		43.4331	12.8875		86	6.27929	1.83947		0.301731	0.242835
87	452.182	406.314		87	66.1203	15.7463		47.1932	12.0026		87	7.53775	2.78633		0.809759	0.42329
88	477.488	409.7		88	65.8463	15.6305		46.5288	10.8178		88	8.77756	2.6976		1.02047	0.405998
89	476.298	409.658		89	64.0474	15.4068		39.8093	13.356		89	9.9029	3.9307		0.962411	0.299777
90	488.181	418.555		90	61.8935	14.6775		41.6052	11.9667		90	9.64069	3.60396		1.12418	0.218119
91	483.932	434.518		91	61.4585	15.0152		40.3349	12.0455		91	7.61769	2.97175		1.28076	0.437597
92	484.223	429.182		92	61.0942	14.7032		42.1178	11.3787		92	9.36326	3.35129		0.558581	0.336559
93	471.257	416.885		93	60.0879	14.8515		39.4158	11.845		93	9.04253	3.13663		0.687469	0.142373
94	474.795	431.3		94	58.4295	14.6698		38.2304	11.4711		94	9.1141	3.04636		0.935612	0.162371
95	482.132	426.031		95	57.4002	14.4994		36.7188	11.3702		95	8.12054	3.33701		0.474735	0.323684
96	471.892	423.772		96	56.4511	14.1814		40.0056	11.8553		96	10.331	4.70392		0.861147	0.215776
97	490.154	419.737		97	55.8795	14.4148		39.0594	11.9083		97	9.82996	3.86343		0.771235	0.22438
98	474.204	429.794		98	55.2158	14.0502		32.8151	12.3541		98	8.55206	3.80342		0.380211	0.218432
99	474.87	429.773		99	53.9417	13.8209		34.8862	11.053		99	8.9185	3.0711		1.00119	0.304434
100	486.751	435.084		100	53.0896	13.5198		33.2016	10.5235		100	8.68654	3.78259		1.06941	0.313738
101	475.305	413.909		101	51.5841	13.6613		34.0122	10.7721
102	480.043	418.068		102	50.6407	13.1323		33.0192	11.823
103	485.747	423.36		103	50.2366	13.3193		34.4889	9.90707
104	461.351	429.167		104	49.1779	13.1394		29.6662	10.1286
105	482.08	422.29		105	49.0496	12.8717		28.2414	10.1761
106	467.563	426.632		106	48.6404	13.0763		30.3874	10.1916
107	486.769	419.953		107	47.0761	12.3835		23.4907	10.2597
108	504.002	427.228		108	46.1299	12.4703		29.7795	9.87362
109	456.119	426.025		109	45.5165	12.2114		23.9237	10.7845
110	486.643	422.889		110	45.2255	11.8449		29.2404	10.6062
111	494.191	436.011		111	43.7591	12.0766		23.8905	10.1192
112	466.101	413.346		112	43.7751	11.8315		25.8537	9.32318
113	477.449	424.675		113	43.7907	12.1949		27.1186	10.0431
114	523.098	432.646		114	41.8978	11.968		25.0923	9.908
115	514.878	433.028		115	41.5305	11.5041		24.2138	9.6128
116	493.531	420.858		116	40.5554	11.6538		25.4785	8.59727
117	486.678	424.38		117	39.5088	11.3435		22.6183	9.65098
118	467.73	436.109		118	39.0996	11.1671		16.0203	9.91252
119	493.075	426.906		119	39.079	11.0108		26.6011	8.33043
120	505.184	433.715		120	38.0694	10.7637		16.0476	9.74086
121	504.74	422.387		121	37.7054	10.7188		18.9606	8.59582
122	485.993	420.908		122	36.4683	10.3135		15.1551	8.89046
123	495.726	423.026		123	36.3856	10.8681		17.1534	9.44438
124	494.711	416.473		124	35.9792	10.6555		18.0234	7.87835
125	510.528	431.284		125	35.7212	10.7516		15.1409	8.59565
126	505.228	452.16		126	34.9079	10.5823		15.8215	9.02543
127	501.764	458.363		127	34.2878	10.0759		14.5159	9.3885
128	496.854	448.003		128	33.3538	9.79152		15.3127	7.9211
129	518.185	449.741		129	33.0631	9.91478		12.689	8.62619
130	494.539	444.58		130	32.7982	9.958		10.2688	9.86991
131	482.734	442.141		131	32.6677	9.2913		11.9099	9.15277
132	489.713	446.738		132	32.6243	9.71023		16.4476	8.00424
133	471.002	437.257		133	31.437	9.3939		13.5614	7.83801
134	469.094	436.464		134	30.3911	9.60053		7.82983	9.30507
135	463.986	445.866		135	30.3376	9.14707		13.8642	7.59863
136	507.014	430.548		136	29.9555	9.10593		8.80709	8.63882
137	476.519	432.478		137	29.8607	9.11749		9.15705	7.88062
138	500.866	457.721		138	29.0847	9.20857		11.6337	7.50357
139	460.991	440.874		139	29.4027	8.91551		11.644	8.52086
140	504.236	438.548		140	28.4162	8.80747		8.71472	7.72695
141	514.04	434.33		141	28.0777	8.78888		6.93064	8.60829
142	495.179	422.538		142	28.0045	8.56305		12.3703	7.39297
143	506.407	413.979		143	26.9412	8.20852		13.825	8.23519
144	517.535	441.2		144	26.7431	8.30134		8.13818	7.76279
145	500.679	440.39		145	26.5851	8.18434		5.8201	8.09247
146	516.545	455.28		146	26.0635	8.17464		7.47778	8.33849
147	502.208	448.191		147	25.5419	8.11502		8.88601	7.27125
148	509.433	445.635		148	25.2195	8.35829		4.28028	7.6578
149	474.577	447.822		149	24.5457	7.9973		6.4326	9.08406
150	481.624	451.702		150	24.2538	8.21901		5.78554	7.196
151	483.92	430.448		151	24.3372	7.95159		7.65209	7.72039
152	474.376	453.631		152	23.4863	7.84538		1.72124	8.51713
153	481.968	442.294		153	23.4934	7.8491		4.12297	7.76044
154	494.633	453.8		154	22.945	7.52573		5.3248	8.30408
155	499.358	444.123		155	23.158	7.5241		6.65337	8.527
156	492.757	455.591		156	22.3778	7.24516		1.54521	7.88055
157	490.794	455.581		157	21.8104	7.33042		3.65976	7.41165
158	482.19	454.761		158	22.1941	7.50886		2.47255	7.74598
159	487.629	449.253		159	21.2915	7.17008		2.92648	7.04272
160	500.009	433.593		160	21.0386	6.97393		7.54432	7.37493
161	529.504	451.786		161	21.6526	6.81834		3.2407	7.23857
162	502.46	445.007		162	20.9181	7.11389		3.10497	6.49725
163	506.242	442.293		163	19.9117	7.03073		5.71521	7.57306
164	484.384	444.591		164	19.8332	6.57921		-0.479026	7.70141
165	489.291	434.315		165	19.5816	6.72568		1.92938	7.25354
166	471.514	436.267		166	19.6384	6.62855		3.84119	7.36355
167	502.955	455.836
168	496.523	436.24
169	486.712	439.279
170	526.155	441.943
171	473.599	445.856
172	504.205	434.482
173	488.889	432.978
174	496.536	433.884
175	491.377	444.587
176	477.434	458.072
177	509.898	439.564
178	490.289	444.176
179	478.554	442.829
180	487.627	453.472
181	504.027	441.724
182	500.471	448.05
183	486.257	447.452
184	484.541	444.407
185	501.473	453.976
186	491.952	438.178
187	510.002	420.658
188	507.948	442.704
189	516.447	462.764
190	499.821	422.601
191	520.519	437.456
192	509.583	429.829
193	527.779	446.64
194	522.071	431.325
195	499.122	439.49
196	503.373	428.666
197	488.191	439.208
198	513.328	456.766
199	507.817	431.254
200	511.549	435.823
201	518.859	434.953
202	509.785	437.874
203	488.787	412.325
204	504.56	441.179
205	501.213	434.388
206	530.376	435.098
207	514.786	430.412
208	503.407	429.058
209	484.351	429.342
210	513.543	423.063
211	512.312	421.322
212	520.337	443.765
213	488.556	423.637
214	501.512	426.201
215	508.27	448.725
216	494.273	444.18
217	495.603	433.84
218	491.05	454.624
219	532.363	439.314
220	501.683	431.116
221	516.545	444.824
222	511.488	449.137
223	531.065	444.455
224	499.58	445.313
225	513.271	445.173
226	506.293	411.931
227	478.661	435.603
228	485.509	437.311
229	512.706	448.134
230	530.079	449.968
231	536.131	436.518
232	530.106	433.973
233	497.39	423.268
234	505.047	437.426
235	508.195	434.105
236	494.086	431.926
237	505.448	435.736
238	499.973	438.058
239	495.317	432.301
240	501.902	444.034
241	503.448	443.54
242	525.741	433.702
243	519.81	442.7
244	509.618	428.766
245	521.822	419.565
246	524.112	460.793
247	507.132	456.681
248	490.675	460.173
249	493.983	441.863
250	507.949	448.629

## Sheet: 3-SD2
ATPase Figure Source Data
Figure 3D
[X] (mM)	Mean	SEM	N
0	0	5.72557	3
0.125	0.955007	6.81334	3
0.25	1.38452	6.84116	3
0.5	0.339398	6.77435	3
1.25	1.64918	6.24754	3
2.5	2.58813	7.09928	3
5	4.67327	7.10161	3
12.5	4.06625	6.09299	3
25	5.67355	6.00725	3
50	9.24625	5.37935	3
125	24.5237	5.43867	3
250	29.9916	5.31809	3
500	36.416	6.17494	3
1000	38.5041	6.55736	3
[X] is the concentrations of the parBF variants used.

## Sheet: 4-SD1
Figure 4A							Figure 4B							Figure 4C							Figure 4D
	ParA			ParB				ParA			ParB				ParA			ParB				ParA			ParB
	N=9			N=9				N=6			N=6				N=6			N=6				N=6			N=6
Time (s)	Average	SEM		Average	SEM		Time (s)	Average	SEM		Average	SEM		Time (s)	Average	SEM		Average	SEM		Time (s)	Average	SEM		Average	SEM
							0	4159.96	267.12		4022.31	521.192									0	1142.6	246.982		2040.7	525.373
10	450.256	29.612		427.655	37.7522		10	3352.18	206.438		3303.09	411.067		10	215.942	29.3334		297.754	73.3935		10	937.897	207.324		1714.96	443.436
20	865.223	56.6207		808.127	73.9311		20	2802.08	179.198		2746.56	323.332		20	405.308	53.346		551.277	121.005		20	776.345	174.755		1451.86	375.085
30	1232.31	77.9124		1185.99	116.049		30	2389.39	170.516		2318.08	255.88		30	571.778	79.4088		809.602	182.874		30	655.046	147.044		1250.78	321.178
40	1553.92	98.3243		1537.03	153.036		40	1967.09	113.384		1992.78	203.716		40	706.429	103.517		1041.79	221.489		40	561.995	124.763		1097.6	280.381
50	1853.07	119.866		1853.37	188.769		50	1694.87	95.9265		1735.05	167.524		50	822.47	124.25		1279.53	272.364		50	488.203	108.912		967.097	247.912
60	2134.41	136.31		2167.09	213.829		60	1492.05	86.9596		1523.4	140.855		60	918.641	144.37		1478.15	303.132		60	421.02	94.5495		866.528	219.275
70	2389.36	154.233		2449.98	251.222		70	1315.93	79.1315		1352.05	120.135		70	1018.88	165.7		1672.14	347.116		70	376.425	84.411		776.471	198.752
80	2611.63	171.828		2707.75	276.619		80	1163.01	70.9732		1202.07	102.186		80	1077.54	175.125		1814.43	364.297		80	328.221	75.4841		709.621	180.778
90	2821.32	185.632		2962.25	301.701		90	1032.44	64.2937		1076.31	88.7511		90	1167.58	196.279		1973.3	406.991		90	298.444	66.2993		646.627	162.64
100	3025.27	199.096		3188.56	322.255		100	918.009	59.1306		970.111	82.3553		100	1223.16	214.329		2096.88	442.48		100	266.069	59.9927		592.629	146.008
110	3202.36	213.814		3399.96	348.623		110	822.353	54.5865		876.593	72.1026		110	1268.49	218.638		2220.46	480.456		110	237.339	54.0317		546.36	134.157
120	3374.01	227.38		3605.54	375.116		120	740.803	50.7669		794.393	65.8506		120	1319.1	228.396		2335.72	496.68		120	217.056	48.3264		506.834	122.21
130	3518.08	236.726		3793.1	394.257		130	663.031	44.1928		724.23	59.1542		130	1364.16	238.45		2408.08	503.848		130	200.302	44.9202		474.255	115.374
140	3655.4	251.676		3948	418.95		140	592.984	40.3207		661.542	56.0057		140	1399.83	245.447		2512.35	532.947		140	178.178	41.2949		447.287	106.543
150	3790.7	259.771		4128.7	444.625		150	534.757	35.5239		606.996	50.4832		150	1450.33	255.031		2609.51	554.435		150	167.099	38.1586		417.595	98.8591
160	3924.87	272.085		4283.84	460.789		160	481.783	33.1152		555.975	48.3086		160	1467.54	261.658		2692.21	579.062		160	154.436	33.6318		392.52	93.1621
170	4038.33	283.876		4428.47	472.688		170	435.948	29.0633		512.74	45.0674		170	1502.06	266.976		2756.76	591.646		170	142.849	32.7362		366.064	86.6137
180	4135.11	292.93		4580.6	495.103		180	390.566	27.2761		469.443	41.3151		180	1535.35	267.658		2819.27	600.141		180	128.864	28.6047		349.093	82.3219
190	4242.4	300.206		4718.95	507.965		190	353.931	25.2137		436.335	39.2456		190	1574.99	278.072		2883.58	621.659		190	123.724	27.8807		331.468	77.6349
200	4355.12	310.233		4824.65	518.457		200	316.505	23.5498		404.849	36.3986		200	1590.15	282.236		2950.1	629.66		200	114.211	25.9571		318.153	73.0204
210	4445.36	318.751		4956.64	540.315		210	284.597	21.7622		371.437	34.9217		210	1620.74	285.818		3001.47	640.615		210	102.729	23.024		304.382	70.8825
220	4539.67	330.94		5068.6	555.279		220	257.363	19.7262		347.803	32.8943		220	1642.54	287.223		3062.42	653.223		220	100.069	22.2994		285.413	66.0209
							230	234.986	18.7027		325.369	31.4015									230	92.89	20.1549		272.676	63.7315
							240	212.686	17.3047		304.4	30.6732									240	87.0891	20.9578		262.333	59.0843
							250	187.318	17.024		285.977	28.8579									250	82.4347	19.6236		253.23	57.6648
							260	173.186	15.4466		269.556	28.6325									260	77.7436	17.1163		244.274	55.4002
							270	160.546	11.6906		253.884	26.9543									270	73.2386	15.0157		235.375	54.1639
							280	147.031	11.6658		238.767	25.4253									280	68.9482	14.8081		225.774	50.9611
							290	137.225	11.1405		227.504	24.7475									290	68.0957	15.4403		215.824	49.1197
							300	120.381	9.99917		213.458	23.5824									300	63.2361	14.4309		208.031	47.1815
							310	114.316	11.1845		203.161	23.7774									310	57.744	12.4337		202.592	45.1579
							320	105.557	9.13068		193.178	22.955									320	55.8003	13.5215		196.699	44.1325
							330	96.6727	9.54449		184.937	22.4674									330	54.1356	11.9116		192.47	41.7634
							340	90.064	8.37837		174.705	22.6022									340	52.2711	11.9824		184.989	41.2461
							350	80.6366	9.26927		170.034	22.2178									350	48.9024	10.8749		180.688	40.3966
							360	76.9363	8.40945		162.227	21.8975									360	45.7585	8.99852		180.057	39.6967
							370	73.4124	7.59533		155.709	21.4464									370	46.5096	9.35019		173.2	38.0875
							380	68.6633	6.72203		149.232	21.3132									380	39.4251	9.756		167.318	37.5712
							390	62.8524	6.44458		142.699	21.3112									390	43.4922	9.34637		161.388	35.4289
							400	58.6566	6.92995		135.503	20.9505									400	39.7674	8.64941		156.828	35.1719
							410	55.5835	7.06395		131.818	20.3522									410	32.6962	7.55492		153.94	33.3921
							420	51.9682	6.78277		125.254	20.3803									420	34.186	7.00378		144.524	31.1361
							430	46.6334	4.66334		120.888	19.7273									430	34.742	7.63685		144.872	32.3931
							440	45.3785	7.49631		117.91	19.6186									440	29.9935	6.54456		142.284	32.7974
							450	44.282	5.85018		114.049	19.0442									450	28.6079	6.89074		136.88	29.303
							460	40.7618	5.83937		108.892	18.8692									460	29.622	7.03049		134.993	28.9376
							470	35.0407	9.42481		104.33	18.8766									470	29.0809	6.47099		130.122	27.0428
							480	31.5407	8.50094		103.07	19.0027									480	26.6269	5.79337		122.815	26.1817
							490	30.9779	8.97227		99.4225	19.1213									490	28.2576	5.80433		125.217	27.1057
							500	26.9421	9.79435		94.5439	18.3361									500	23.6919	6.06595		119.219	27.0223
							510	30.8551	5.92891		92.838	18.2886									510	24.7305	6.72257		119.641	27.4574
							520	29.9249	4.42943		91.1202	18.7027									520	24.5184	4.46668		110.823	25.1798
							530	31.0969	5.65318		88.0646	18.2393									530	20.0894	4.92525		108.105	24.1164
							540	29.5492	5.63922		85.494	17.1326									540	22.1453	5.43973		106.529	24.9867
							550	27.505	4.6151		82.7542	17.1512									550	24.1581	4.67728		107.048	23.5713
							560	22.8527	5.37521		80.0517	17.3866									560	22.7049	5.72218		100.171	23.7317
							570	25.5591	6.4665		79.2209	17.446									570	21.3942	4.56274		100.132	22.4952
							580	21.8556	5.75027		75.8977	17.1189									580	21.2794	4.6848		97.7866	22.9875
							590	24.5631	6.04633		75.1285	16.7998									590	16.5288	2.8083		93.7466	21.869
							600	23.2513	5.07873		72.4635	17.0449									600	18.5804	5.1102		89.1807	20.8167

## Sheet: 4-SD2
ATPase Figure Source Data
Figure 4E
	pBR322 + 5 μM Scram					pBR322 + 5 μM SopC
[X] (mM)	Mean	SEM	N		[X] (mM)	Mean	SEM	N
0	0.569664	0.643058	12		0	2.14834	0.844739	12
0.05	2.60073	1.37485	6		0.05	3.72867	1.56065	6
0.125	5.03785	1.89386	6		0.125	10.3387	1.8595	6
0.25	11.8997	2.23181	6		0.25	19.4488	1.71815	6
0.375	23.2694	1.34265	6		0.375	30.847	1.58166	6
0.5	28.4092	0.916136	6		0.5	34.9159	1.56606	6
1.25	38.1967	2.48181	6		1.25	61.6936	1.91445	6
2.5	43.1475	1.72502	12		2.5	72.1288	1.43872	12
3.75	46.0122	3.0269	6		3.75	73.4236	2.36875	6
5	49.4268	1.99114	12		5	77.8844	1.66402	12
10	54.9876	1.90496	6		10	80.3664	1.94172	6
[X] is the concentrations of the parBF variants used.

## Sheet: 4-1-SD1
Figure 4-figure supplement 1-Source Data 1
PArBF (nM)	FRET efficency %
0.976563	1.836
1.95312	3.6207
3.90625	2.91161
7.8125	6.31177
15.625	12.8996
31.25	20.5648
62.5	23.9477
125	26.111
250	27.1965
500	23.5174
1000	30.4642

## Sheet: 4-2-SD1
Figure 4-figure supplement 2-Source Data 1
Panel A							Panel B							Panel C							Panel D							Panel E								Panel F
	ParA			ParB				ParA			ParB				ParA			ParB				ParA			ParB			ParBF (uM)	pBR322 + 5mM Scram			pBR322 + 5 mM parS
	N=8			N=8				N=8			N=8				N=12			N=12				N=8			N=8				Mean	SEM	N	Mean	SEM	N			% DNA bound
Time (s)	Average	SEM		Average	SEM		Time (s)	Average	SEM		Average	SEM		Time (s)	Average	SEM		Average	SEM		Time (s)	Average	SEM		Average	SEM		0	-1.351	0.961	3	-0.705	1.452	3		[ParBFB] (nM)	WT	R121A
							0	5315.35	709.148		5690.22	688.721									0	5088.6	435.768		5563.8	429.356		0.15	5.867	0.829	3	6.432	1.369	3		0	0	0
1	74.5516	10.1475		144.165	31.6378		0.5	5063.82	690.54		5147.9	603.037		1	137.175	29.6488		222.259	60.2771		1	4835.35	427.607		5094.12	397.711		0.3	8.359	0.772	3	8.426	1.547	3		0.05	3.94189	2.87816
2	120.907	14.5575		178.419	32.3464		1	4919	666.47		4868.1	558.352		2	189.118	33.8821		282.308	64.454		2	4703.61	414.487		4852.47	381.886		0.6	19.199	2.189	3	15.938	2.462	3		0.1	3.80857	7.88056
3	167.394	21.8391		213.222	39.0772		1.5	4783.52	656.742		4654.16	528.892		3	236.714	35.7567		328.564	66.1018		3	4566.06	405.692		4657.18	369.405		1.2	40.716	5.032	3	36.772	7.061	3		0.2	3.45782	11.2896
4	217.091	26.6108		248.187	49.4612		2	4667.14	635.247		4489.73	506.505		4	282.412	36.2842		380.672	67.7053		4	4461.52	395.102		4494.17	356.369		1.5	54.52	7.234	3	42.174	9.154	3		0.4	10.7947	23.0807
5	264.103	31.2507		283.501	54.0404		2.5	4551.25	618.623		4346.77	488.758		5	333.38	38.8542		431.066	69.0292		5	4360.59	388.103		4351.73	342.394		3	57.875	7.426	3	48.223	8.845	3		0.8	18.1374	20.4105
6	317.726	36.1298		323.175	56.5597		3	4440.71	607.217		4216.93	470.106		6	378.3	41.4095		478.218	70.3873		6	4252.37	379.691		4229.79	332.377		6	66.584	3.049	3	62.599	3.467	3		1.6	23.7382	34.8592
7	364.7	42.2634		367.899	60.6316		3.5	4334.22	592.711		4101.13	457.839		7	423.968	42.2748		520.685	71.718		7	4141.77	370.833		4119.01	326.123		12	57.522	2.531	3	60.567	2.266	3		3.2	45.52	61.3222
8	413.673	46.2678		415.696	60.4158		4	4229.42	586.216		3990.4	442.968		8	470.795	43.6804		569.126	74.6385		8	4041.23	365.788		4011.53	316.349										6.4	59.4762	80.6184
9	463.123	53.4387		456.724	63.1063		4.5	4133.32	566.195		3895.24	434.262		9	511.775	45.5575		613.466	76.029		9	3957.31	352.743		3919.05	311.646										12.8	65.4801	75.0381
10	505.178	56.5443		504.65	64.7751		5	4039.75	548.767		3799.16	420.984		10	542.959	47.6817		655.793	78.1392		10	3868.63	343.888		3826.49	303.997										25.6	74.7851	76.7677
11	555.764	64.323		551.658	67.0164		5.5	3946.77	540.492		3713.68	409.502		11	584.761	48.609		702.992	80.3161		11	3789.91	341.519		3743.13	298.089										51.2	77.5188	90.3753
12	597.523	69.5421		591.725	69.7622		6	3858.7	530.908		3635.56	401.683		12	629.807	52.045		746.205	81.7395		12	3710.28	334.529		3664.94	292.415
13	640.093	72.2098		640.728	74.144		6.5	3786.68	519.188		3557.45	392.249		13	669.929	53.7225		785.829	84.2419		13	3632.8	324.18		3584.99	285.74
14	685.589	76.661		684.381	78.6901		7	3690.54	507.86		3487.6	385.209		14	710.352	54.5769		828.567	85.83		14	3544.71	319.264		3516.27	281.565
15	729.762	80.3168		730.538	82.6272		7.5	3620.74	494.316		3423	376.431		15	750.888	57.5263		865.95	86.2478		15	3473.21	309.278		3444.29	272.72
16	777.429	87.2136		788.704	89.6499		8	3544.81	486.521		3356.02	368.575		16	785.004	58.1842		906.303	87.5188		16	3400.42	300.382		3381.95	268.765
17	820.557	90.2368		828.714	92.0053		8.5	3473.51	477.076		3288.57	359.518		17	824.109	57.9534		947.109	89.712		17	3343.23	298.951		3318.2	264.684
18	865.785	94.4655		874.4	98.5015		9	3424.23	468.163		3229	352.981		18	862.338	60.1477		988.193	91.0559		18	3288.41	291.982		3260.05	260.938
19	912.715	101.688		915.349	103.463		9.5	3355.64	460.404		3175.51	348.349		19	898.484	61.0275		1029.57	93.4498		19	3222.65	284.98		3204.15	257.276
20	957.989	108.738		955.214	108.498		10	3287.06	453.816		3116.72	341.352		20	926.81	64.6651		1069.69	94.6297		20	3156.92	282.166		3148.23	253.646
21	1001.96	111.811		994.22	111.385		10.5	3235.96	446.581		3063.38	335.154		21	965.042	66.7469		1111.22	95.6981		21	3103.22	276.309		3092.74	249.388
22	1040.97	115.146		1034.15	114.898		11	3171.89	436.608		3009.7	329.637		22	1001.91	67.678		1146.22	98.1533		22	3040.59	269.364		3039.8	245.53
23	1079.96	117.676		1065.77	117.648		11.5	3112.48	432.051		2961.9	327.3		23	1035.66	67.6575		1184.45	99.5545		23	2989.17	265.295		2986.56	241.719
24	1126.77	120.332		1109.34	123.247		12	3046.52	419.049		2912.58	320.733		24	1070.11	69.7736		1226.28	101.976		24	2931.85	261.123		2937.56	238.451
25	1168.44	124.52		1141.35	126.811		12.5	2996.44	415.273		2865.42	314.35		25	1100.14	72.0141		1264.98	103.435		25	2883.51	256.998		2892.48	235.17
26	1203.34	131.19		1178.38	131.351		13	2949.45	408.948		2820.49	307.808		26	1137.92	72.7242		1304.12	104.594		26	2839.64	251.999		2850.19	233.021
27	1248.18	133.974		1221.24	136.161		13.5	2893.97	399.978		2772.86	301.737		27	1165.5	76.1004		1342.08	106.021		27	2785.1	247.364		2805.21	230.113
28	1295.41	138.544		1255.59	138.944		14	2849.63	396.36		2731.83	296.621		28	1199.3	78.6888		1381.13	108.005		28	2740.82	244.379		2760.31	224.075
29	1334.96	143.94		1293.54	142.092		14.5	2799.1	388.196		2691.88	291.445		29	1232.88	79.7555		1419.14	109.314		29	2690.56	237.119		2720.46	220.572
30	1364.86	145.283		1330.39	147.007		15	2762.23	385.754		2649.31	285.498		30	1261.43	81.1629		1457.34	111.136		30	2650.94	234.388		2676.98	216.976
31	1411.49	148.333		1369.49	150.671		15.5	2710.47	376.521		2608.17	279.949		31	1298.58	82.1312		1495.14	112.066		31	2606.49	228.494		2637.09	213.718
32	1455.8	154.778		1404.84	154.444		16	2669.22	374.633		2568.35	275.756		32	1328.79	83.9389		1526.26	112.962		32	2560.38	226.086		2599.34	211.78
33	1496.13	159.823		1443.59	159.578		16.5	2628.85	365.289		2532.72	271.376		33	1354.39	85.3785		1561.59	114.289		33	2536.42	224.182		2563.82	210.192
34	1525.98	160.098		1479.21	160.621		17	2587.22	361.304		2496.59	267.68		34	1388.99	86.7194		1597.47	116.334		34	2485.45	222.053		2529.12	206.834
35	1572.8	166.004		1516.22	164.329		17.5	2543.16	355.784		2464.62	263.908		35	1415.08	88.5949		1635.48	119.853		35	2440.8	214.853		2490.69	201.942
36	1612.75	168.594		1551.46	169.599		18	2510.09	350.959		2429.78	258.485		36	1447.77	88.0879		1670.14	120.286		36	2411.34	210.97		2453.36	198.147
37	1650	173.745		1586.15	172.548		18.5	2469.69	349.901		2396.47	255.155		37	1477.78	93.9594		1701.29	121.975		37	2364.55	208.938		2420.54	196.046
38	1693.31	176.938		1624.95	176.285		19	2426.76	340.817		2362.7	251.753		38	1509.88	91.3708		1734.81	124.049		38	2323.56	207.095		2386.91	193.603
39	1726.88	178.446		1656.87	179.234		19.5	2390.07	339.425		2336.29	248.045		39	1541.77	93.1177		1771.81	125.159		39	2295.62	205.502		2358.18	189.608
40	1770.31	183.42		1694.88	183.718		20	2354.56	331.762		2303.84	244.958		40	1570.8	95.571		1804.85	125.887		40	2257.1	200.413		2326.58	188.601
41	1793.06	189.406		1729.03	188.292		20.5	2323.83	327.74		2275.33	242.072		41	1583.37	97.4836		1833.78	127.574		41	2226.19	196.98		2294.92	186.383
42	1829.36	191.72		1762.69	193.624		21	2285.2	324.959		2245.19	238.992		42	1616.4	100.942		1863.5	129.36		42	2182.67	194.627		2260.65	182.817
43	1865.07	192.06		1791.52	194.236		21.5	2253.62	321.62		2219.15	236.897		43	1651.71	102.454		1896.55	130.289		43	2148.54	193.499		2231.99	179.666
44	1914.13	200.049		1823.09	199.219		22	2224.4	318.213		2187.61	231.803		44	1670.2	104.554		1930.39	132.193		44	2125.01	191.46		2208.19	179.104
45	1949.71	202.383		1857	204.207		22.5	2197.38	312.382		2167.18	230.569		45	1698.51	105.431		1959.35	132.583		45	2096.51	186.541		2178.94	174.617
46	1993.8	206.276		1887.74	207.515		23	2169.8	308.234		2141.52	230.087		46	1723.32	106.558		1990.65	136.32		46	2070.49	183.185		2153.16	174.08
47	2019.67	211.456		1919.87	211.295		23.5	2142.6	306.935		2116.38	227.668		47	1750.95	107.761		2019.73	135.941		47	2039.46	180.719		2127.73	172.544
48	2051.8	216.169		1946.6	214.019		24	2110.2	302.111		2090.67	225.053		48	1775.52	110.814		2046.41	138.59		48	2007.18	179.838		2101.34	171.463
49	2086.3	220.156		1978.97	219.467		24.5	2077.73	298.403		2065.61	222.974		49	1813.48	112.833		2077.86	140.97		49	1974.08	176.132		2073.09	169.019
50	2121.88	224.38		2006.1	220.862		25	2063.46	295.789		2041.87	218.172		50	1834.69	114.507		2107.25	142.407		50	1955.29	171.869		2050.74	167.222
51	2163.69	225.649		2043.02	227.691		25.5	2034.97	294.015		2019.02	215.043		51	1860.66	115.524		2132.83	142.791		51	1923.44	168.947		2028.35	165.151
52	2200.94	229.907		2071.15	228.049		26	2001.96	288.279		1994.45	212.768		52	1883.13	115.454		2160.67	143.496		52	1893.79	167.042		2004.44	164.002
53	2229.38	233.422		2098.5	231.507		26.5	1977.32	290.689		1972.49	210.025		53	1906.71	117.925		2191.86	145.327		53	1869.23	166.736		1979.15	161.059
54	2268.79	233.961		2128.73	233.845		27	1946.68	281.731		1950.32	208.841		54	1933.2	120.036		2216.41	145.655		54	1844.81	163.897		1957.7	160.08
55	2292.42	240.213		2158.69	237.664		27.5	1920.57	281.352		1931.59	207.614		55	1960.72	120.657		2249.56	148.429		55	1822.39	165.224		1937.09	158.44
56	2333.2	244.668		2200.03	243.384		28	1895.2	275.238		1907.66	204.439		56	1981.94	121.432		2277.04	150.721		56	1793.9	162.497		1914.3	156.837
57	2365.04	247.915		2225.4	244.74		28.5	1872.79	270.654		1889.01	201.908		57	2005.06	123.752		2296.04	150.157		57	1778.71	160.006		1896.57	155.617
58	2390.48	250.685		2255.36	247.763		29	1856.73	269.538		1869.14	200.409		58	2026.95	126.826		2324.73	152.682		58	1747.94	156.677		1873.22	153.902
59	2432.8	255.689		2290.79	250.473		29.5	1824.18	264.819		1844.98	197.552		59	2050.35	127.718		2348.38	154.543		59	1723.66	153.957		1853.35	153.306
60	2459.96	257.03		2322.46	253.85		30	1804.59	260.732		1827.19	196.386		60	2075.57	128.386		2375.09	154.199		60	1704.05	152.329		1830.04	150.848
61	2498.86	261.368		2347.28	256.96		30.5	1781.53	262.283		1806.11	194.617		61	2092.69	129.138		2398.7	157.389		61	1679.91	153.607		1809.32	150.672
62	2530.49	262.865		2377.06	262.949		31	1758.3	257.732		1790.5	192.742		62	2112.02	130.813		2424.38	159.096		62	1655.27	152.142		1792.58	148.986
63	2552.65	263.982		2413.11	266.405		31.5	1742.14	259.72		1772.31	190.944		63	2141.39	131.494		2444.88	159.844		63	1636.85	149.965		1775.61	148.3
64	2581.34	269.596		2444.52	269.015		32	1715.85	251.742		1754.7	188.031		64	2165.82	133.729		2473.87	160.808		64	1619.68	147.324		1756.33	145.899
65	2628.47	270.325		2476.53	272.375		32.5	1702.14	252.051		1738.04	184.864		65	2189.05	136.013		2502.64	163.233		65	1599.1	144.93		1739.65	143.932
66	2646.88	277.236		2507.98	276.88		33	1684.76	249.501		1723.91	183.86		66	2209.37	135.144		2524.23	163.583		66	1581.66	142.518		1726.87	143.651
67	2680	280.767		2537.29	279.234		33.5	1660.66	246.717		1704.1	183.184		67	2229.21	135.978		2551.7	165.72		67	1561	142.295		1703.66	142.513
68	2702.86	281.727		2566.11	279.759		34	1641.72	243.808		1688.55	180.548		68	2250.55	140.136		2572.27	167.905		68	1537.91	139.553		1687.99	140.43
69	2743.75	283.256		2592.99	282.278		34.5	1624.25	238.821		1669.07	177.909		69	2270.38	141.356		2597.2	170.361		69	1522.39	137.669		1669.43	138.035
70	2776.69	290.414		2623.7	285.776		35	1608.93	238.183		1651.07	176.307		70	2296.47	143.063		2621.61	172.443		70	1503.72	137.268		1652.7	137.774
71	2798.2	294.05		2652.71	287.861		35.5	1598.07	235.167		1636.91	176.256		71	2315.47	145.371		2645.99	173.471		71	1486.74	135.87		1637.28	137.347
72	2826.74	294.898		2678.47	290.807		36	1578.36	230.291		1624.44	173.984		72	2338.94	145.124		2670.88	174.898		72	1463.2	134.043		1624.25	135.27
73	2864.92	296.518		2708.94	294.962		36.5	1556.83	229.475		1605.42	173.948		73	2358.71	146.778		2691.56	175.819		73	1451.44	132.795		1607.37	135.056
74	2890.13	301.048		2735.31	297.053		37	1535.41	229.267		1588.71	170.723		74	2383.72	149.26		2720.06	177.539		74	1432.06	131.316		1591.09	132.66
75	2910.98	304.368		2761.74	298.71		37.5	1524.45	227.824		1569.6	169.017		75	2388.86	150.348		2734.46	176.704		75	1421.75	131.303		1575.85	132.738
76	2949.15	303.247		2792.22	302.343		38	1500.04	226.775		1555.11	167.595		76	2417.73	151.309		2762.03	180.024		76	1403.58	130.902		1560.09	131.546
77	2980.76	310.629		2821.23	307.49		38.5	1486.19	223.082		1539.82	166.319		77	2434.67	153.486		2783.67	180.11		77	1386.76	127.928		1546.89	130.847
78	3005.08	313.373		2853.63	310.721		39	1470.84	222.066		1529.91	164.724		78	2459.93	152.651		2803.35	180.542		78	1370.3	127.513		1534.48	128.504
79	3025.72	311.449		2880.24	312.712		39.5	1452.6	219.698		1512.27	162.749		79	2478.38	155.842		2831.4	182.971		79	1349.76	124.603		1519.31	128.145
80	3058.42	318.034		2907.36	317.024		40	1435.95	217.352		1501.03	161.729		80	2497.68	156.05		2844.29	184.713		80	1339.46	124.467		1507.15	127.177
81	3085.06	318.682		2929.7	318.165		40.5	1422.49	215.399		1485.58	160.039		81	2517.37	156.91		2869.13	187.296		81	1324.18	122.894		1491.99	127.243
82	3118.08	323.538		2961.43	322.211		41	1404.26	214.52		1472.89	159.545		82	2542.68	157.741		2890.13	187.027		82	1306.58	123.31		1479.19	126.652
83	3137.66	327.497		2983.32	323.846		41.5	1396.74	214.037		1462.75	158.218		83	2544.72	158.138		2909.66	189.239		83	1293.86	119.221		1468.46	125.054
84	3170.49	328.866		3007.57	327.114		42	1380.54	211.907		1447.34	155.449		84	2567.62	161.673		2931.55	190.807		84	1279.55	120.179		1453.95	124.192
85	3195.47	333.892		3037.51	330.225		42.5	1360.53	209.799		1433.58	155.577		85	2591.91	162.526		2953.2	191.636		85	1256.22	119.736		1438.65	123.108
86	3227.53	336.733		3065.69	332.135		43	1347.84	205.825		1422.83	153.776		86	2614.08	166.067		2969	193.171		86	1250.66	117.698		1431.17	123.115
87	3244.07	334.046		3087.29	334.687		43.5	1331.4	202.468		1409.67	152.378		87	2621.26	162.207		2992.23	192.539		87	1234.99	115.026		1417.03	122.775
88	3280.2	339.113		3114.62	336.374		44	1323.37	202.621		1398.68	151.149		88	2641.47	163.957		3013.24	195.052		88	1215.77	112.609		1403.53	121.095
89	3298.83	342.107		3139.46	340.76		44.5	1309.17	201.267		1386.01	149.944		89	2663.72	164.642		3032.58	196.034		89	1204.59	113.23		1392.92	121.096
90	3338.82	350.296		3161.35	343.135		45	1289.66	196.526		1374.12	148.33		90	2677.93	167.579		3050.69	197.115		90	1193.03	110.9		1378.18	118.719
91	3350.99	350.696		3183.59	343.658		45.5	1281.83	197.381		1365.76	147.917		91	2703.09	170.438		3072.01	198.181		91	1181.69	111.783		1370.63	118.676
92	3385.75	352.581		3214.11	348.811		46	1267.74	192.923		1350.97	145.177		92	2705.97	168.734		3084.88	198.18		92	1169.67	109.608		1360.92	118.246
93	3408.19	354.849		3239.6	349.233		46.5	1257.61	191.566		1340	145.055		93	2739.5	171.594		3102.4	200.337		93	1158.55	108.286		1348.15	117.995
94	3433.53	356.88		3269.4	354.802		47	1244.1	189.586		1330.96	143.833		94	2752.7	175.192		3122.5	203.669		94	1144.6	107.057		1333.65	115.428
95	3459.43	356.497		3288.94	355.757		47.5	1230.81	187.447		1320.87	142.574		95	2770.43	172.445		3137.37	205.55		95	1132.98	106.078		1325.19	115.778
96	3479.16	353.765		3312.55	357.777		48	1218.03	186.301		1310.21	142.529		96	2792.02	176.328		3160.7	207.885		96	1120.34	104.629		1316.14	115.979
97	3498.83	361.834		3338.87	363.381		48.5	1204.35	185.669		1300.13	141.693		97	2803.95	174.156		3175.77	207.853		97	1105.79	105.179		1304.84	114.368
98	3530.24	365.544		3355.74	361.779		49	1190.1	185.064		1289.54	140.184		98	2817.69	174.249		3191.24	209.16		98	1095.65	105.496		1297.04	114.452
99	3549	369.897		3392.58	366.056		49.5	1181.98	184.927		1278.04	138.977		99	2834.2	179.339		3213.87	212.511		99	1084.83	105.269		1284.93	112.433
100	3584.9	371.378		3411.64	367.664		50	1169.39	180.762		1269.95	137.455		100	2854.25	180.666		3231.32	214.146		100	1069.73	102.732		1274.7	111.315
101	3609.31	374.953		3433.91	372.995		50.5	1160.04	181.42		1262.55	136.754		101	2871.88	181.688		3245.1	214.881		101	1061.33	101.412		1267.58	110.767
102	3633.95	380.615		3454.63	373.138		51	1143.97	176.979		1251.15	134.645		102	2884.55	183.39		3265.02	216.259		102	1050.17	100.648		1257.51	109.977
103	3662.02	376.917		3484.54	376.317		51.5	1138.66	180.632		1243.92	133.89		103	2899.4	184.146		3283.52	217.81		103	1038.91	99.6893		1250.53	109.998
104	3663.19	378.128		3506.44	379.555		52	1126.81	178.036		1232.65	132.915		104	2912.47	183.91		3302.52	219.151		104	1029.17	98.8568		1238.92	108.668
105	3708.43	387.481		3527.98	381.802		52.5	1111.47	172.766		1219.4	128.69		105	2934.16	189.204		3320.04	219.864		105	1018.51	97.1954		1229.51	107.636
106	3724.94	395.952		3548.54	383.467		53	1098.46	172.126		1212.32	128.48		106	2941.07	186.406		3338.15	220.123		106	1006.04	97.1067		1220.6	106.787
107	3749.39	398.7		3571.42	387.203		53.5	1091.3	170.902		1200.73	125.778		107	2955.84	184.541		3356.78	223.044		107	1000.49	96.358		1212.49	106.193
108	3767.82	395.696		3601.21	388.266		54	1085.04	168.388		1193.27	125.761		108	2978.72	189.971		3371.29	223.956		108	990.366	95.2961		1202.27	105.386
109	3798.87	399.509		3623.99	391.464		54.5	1070.34	166.964		1183.18	124.145		109	2987.82	190.842		3386.65	225.248		109	978.222	94.7476		1191.63	104.131
110	3820.3	403.434		3649.01	395.363		55	1062.94	165.671		1175.25	123.719		110	3005.74	190.409		3400.17	225.198		110	967.845	93.1524		1181.23	102.834
111	3838.13	401.555		3680.78	400.575		55.5	1051.7	165.739		1166.2	122.042		111	3020.29	191.504		3411.27	225.672		111	958.035	92.5429		1172.32	101.222
112	3853.27	407.317		3691.62	401.294		56	1041.33	161.938		1158.41	121.798		112	3041.44	192.827		3436.55	226.851		112	949.307	90.7461		1163.66	100.616
113	3886.37	411.015		3722.6	401.651		56.5	1027.97	159.063		1148.31	119.05		113	3053.58	194.408		3453.21	229.389		113	939.358	89.2736		1152.56	98.4113
114	3908.06	413.467		3745.28	403.973		57	1016.74	160.679		1140.56	119.237		114	3067.85	196.825		3466.6	230.167		114	924.974	90.6341		1144.35	98.6995
115	3930.91	411.72		3775.41	407.42		57.5	1007.16	157.321		1133.41	118.142		115	3087.61	194.924		3474.82	230.43		115	920.045	88.5169		1137.39	97.8652
116	3946.73	412.038		3802.94	410.76		58	1000.91	157.375		1122.08	115.46		116	3098.97	194.897		3490.17	231.774		116	911.349	90.359		1130.83	98.1108
117	3980.62	418.483		3823.27	413.668		58.5	988.875	152.847		1117.13	115.226		117	3108.4	199.042		3506.73	233.964		117	896.287	87.3166		1122.31	97.13
118	3995.72	413.869		3850.88	416.553		59	981.892	155.118		1107.28	113.817		118	3125.26	198.856		3520.74	234.895		118	891.945	86.8865		1114.68	96.3586
119	4016.78	417.367		3871.73	419.113		59.5	968.452	150.921		1098.56	111.586		119	3133.42	196.835		3533.36	235.229		119	882.718	86.5499		1106.81	96.0433
120	4026.77	424.189		3887.52	420.479		60	963.007	150.544		1092.76	111.948		120	3153.04	202.174		3549.86	236.492		120	871.813	85.7935		1099.79	95.7091
121	4052.18	425.001		3910.04	423.148		60.5	952.302	150.439		1086.64	111.312		121	3166.48	202.325		3561.62	239.927		121	862.716	85.8136		1093.08	94.8425
122	4071.89	429.367		3927.46	424.748		61	942.795	148.623		1077.35	111.034		122	3175.64	202.109		3574.14	240.359		122	857.724	84.5439		1084.9	94.9318
123	4095.34	433.244		3940.61	426.818		61.5	931.534	145.388		1069.63	109.855		123	3187.74	203.874		3587.3	241.349		123	846.788	83.2854		1076.44	94.171
124	4125.04	432.638		3971.82	431.891		62	925.021	145.605		1061.69	109.807		124	3207.3	206.042		3603.5	242.429		124	839.131	82.5969		1068.5	94.1853
125	4143.69	435.105		3991.36	435.081		62.5	920.298	142.829		1056.95	108.854		125	3216.21	204.441		3615.94	245.467		125	835.226	80.9155		1062.05	93.275
126	4154.55	438.491		4011.31	436.701		63	909.727	142.672		1044.36	106.692		126	3225.83	208.583		3631.01	246.281		126	823.866	79.7484		1054.13	92.9935
127	4174.49	439.517		4026.12	438.628		63.5	898.883	141.885		1040.2	105.696		127	3249.57	207.162		3641.53	245.32		127	813.031	79.5448		1050.23	92.3205
128	4212.03	442.048		4053.37	440.373		64	894.824	139.279		1033.77	105.101		128	3260.76	208.838		3654.99	247.435		128	813.913	79.1742		1043.71	92.4717
129	4215.55	445.885		4074.09	440.158		64.5	885.618	137.864		1027.3	105.603		129	3275.3	210.177		3666.97	247.105		129	802.655	78.5588		1033.46	91.0634
130	4244.07	444.97		4094.52	444.133		65	872.909	135.966		1018.59	104.989		130	3284.55	211.016		3676.46	247.946		130	794.781	78.7922		1027.63	91.9407
131	4260.93	449.603		4117.89	448.136		65.5	871.647	137.236		1013.34	103.304		131	3289.68	211.004		3694.18	248.498		131	786.789	77.782		1022.03	91.2982
132	4298.13	450.35		4145.64	449.526		66	857.228	133.555		1004.24	101.702		132	3309.77	209.795		3707.13	250.633		132	779.132	77.4595		1013.99	90.6282
133	4326.95	454.569		4163.66	450.908		66.5	849.32	132.192		997.972	101.506		133	3324.76	213.128		3720.75	252.057		133	769.306	75.649		1007.29	89.8023
134	4331.02	456.086		4187.5	454.153		67	840.472	129.771		991.389	99.9		134	3329.42	213.992		3729.08	251.651		134	767.266	76.4309		1001.89	89.0035
135	4349.15	462.087		4213.33	456.706		67.5	833.406	130.334		984.28	100.067		135	3349.59	214.842		3742.95	253.238		135	753.937	73.0797		994.488	88.8328
136	4359.43	458.89		4229.53	457.043		68	821.586	129.136		977.658	99.9173		136	3351.62	215.101		3753.85	252.722		136	746.375	72.6723		987.796	89.1925
137	4366.3	462.07		4252.39	460.573		68.5	820.442	125.379		971.985	98.5779		137	3374.17	217.967		3771.06	254.855		137	743.615	72.0512		982.114	88.5072
138	4384.33	462.875		4271.09	463.35		69	809.45	125.43		962.539	97.1891		138	3376.21	216.095		3786.93	255.889		138	734.36	72.3382		973.029	87.2528
139	4411.15	462.082		4288.6	464.014		69.5	804.518	126.36		958.943	96.9349		139	3391.28	215.765		3799.61	257.475		139	724.824	70.7072		967.551	86.7035
140	4428.08	468.504		4309.76	469.202		70	796.182	124.171		952.531	96.1506		140	3399.48	218.119		3812.11	257.165		140	719.543	71.3787		961.227	86.8776
141	4452.36	470.968		4332.06	471.303		70.5	786.769	121.901		941.88	95.6506		141	3410.37	220.164		3828.07	256.951		141	711.915	70.4189		952.348	86.4754
142	4463.67	473.36		4344.52	473.084		71	777.974	121.071		937.091	94.2241		142	3423.64	222.605		3838.43	258.607		142	704.847	69.3579		946.935	85.7596
143	4508.84	477.997		4370.25	475.653		71.5	773.034	120.596		931.643	94.4347		143	3438.83	219.599		3845.59	261.071		143	699.671	68.7526		940.464	85.5201
144	4505.98	474.834		4388.05	478.892		72	765.296	118.875		923.376	92.3806		144	3446.48	222.181		3858.5	261.571		144	694.224	69.2788		935.696	85.4978
145	4523.13	474.227		4405.72	480.383		72.5	762.133	119.307		918.322	92.5497		145	3459.53	223.77		3870.21	264.796		145	688.009	69.5746		928.525	84.9929
146	4557.29	478.522		4423.67	482.37		73	755.722	116.864		911.177	91.5385		146	3469.48	224.733		3885.28	266.03		146	685.418	68.184		922.126	84.7987
147	4580.04	481.172		4447.05	486.129		73.5	747.662	116.05		906.609	90.3625		147	3480.04	225.814		3894.45	267.578		147	675.052	67.5754		915.6	83.2698
148	4590.57	482.008		4463.86	489.161		74	742.26	114.289		901.02	91.2587		148	3485.61	223.656		3906.48	265.66		148	672.318	66.7387		910.035	83.2463
149	4586.2	485.211		4483.83	490.904		74.5	735.943	113.751		892.532	90.0281		149	3509.64	225.505		3919.92	268.757		149	663.2	66.2812		903.939	84.0562
150	4601.53	488.933		4505.86	492.88		75	729.677	111.455		887.101	88.4977		150	3515.48	225.49		3925.19	268.269		150	659.077	64.5881		897.838	81.9505
151	4636.58	492.893		4519.79	494.082		75.5	718.831	111.589		881.288	88.1457		151	3516.01	225.964		3935.86	269.952		151	649.651	65.8476		892.688	81.9496
152	4632.48	490.771		4536.43	497.446		76	708.837	109.826		874.833	87.3404		152	3534.94	227.986		3943.92	270.058		152	643.071	65.1127		888.016	82.3618
153	4659.03	491.885		4553.47	497.61		76.5	705.268	109.482		869.064	86.4517		153	3544	231.19		3954.49	269.661		153	636.885	63.7538		883.924	82.6501
154	4676.36	494.236		4578.59	503.188		77	696.239	107.032		863.568	86.337		154	3549.86	229.779		3968.35	271.436		154	634.085	63.7732		875.127	81.1048
155	4694.38	497.656		4589.17	500.323		77.5	689.974	105.947		858.817	84.9889		155	3573.08	230.845		3981.64	272.441		155	628.405	63.4171		871.927	80.9465
156	4724.02	510.318		4609.62	503.593		78	687.312	106.265		849.988	84.8064		156	3585.65	233.645		3995.1	272.602		156	622.334	61.9166		864.933	81.158
157	4736.09	509.757		4623.03	505.444		78.5	681.551	105.686		846.107	83.7765		157	3587.5	230.906		4005.89	273.187		157	617.502	61.3251		861.465	79.9184
158	4730.34	504.817		4637.97	508.827		79	674.21	104.17		842.219	83.5928		158	3591.13	231.409		4011.19	273.168		158	606.768	60.694		855.453	79.7606
159	4757.07	511.811		4655.01	508.362		79.5	667.605	103.102		837.249	82.9569		159	3606.57	236.365		4021.37	273.781		159	602.687	60.2149		851.326	79.108
160	4785.55	506.789		4674.81	509.686		80	662.223	102.127		833.014	82.2629		160	3616.81	233.542		4034.54	273.761		160	598.056	59.418		847.232	78.8084
161	4796.06	510.867		4695.42	511.975		80.5	657.282	102.195		827.141	81.6316		161	3637.29	237.867		4045.56	274.91		161	592.485	59.8045		841.415	78.5441
162	4809.46	515.794		4715.35	513.297		81	647.118	98.7822		822.038	79.7984		162	3646.86	236.106		4055.95	278.339		162	587.206	58.2095		837.749	77.7209
163	4831.06	521.548		4740.97	518.29		81.5	643.477	98.5534		816.003	79.1546		163	3641.93	233.752		4062.63	280.187		163	583.043	58.9166		832.595	77.0781
164	4836.64	513.532		4754.63	518.862		82	637.225	97.1503		810.305	78.8504		164	3664.95	240.815		4077.94	280.873		164	576.291	57.4119		827.331	76.7248
165	4855.5	521.659		4775.27	520.134		82.5	634.208	96.2586		807.278	78.1283		165	3679.92	239.562		4087.18	282.345		165	574.941	57.2801		821.305	75.8095
166	4861.83	521.822		4791.07	521.705		83	627.607	95.9961		799.422	77.5614		166	3685.27	242.115		4107.22	284.963		166	570.472	58.095		817.52	76.5679
167	4887.56	524.864		4803.61	520.272		83.5	616.151	93.252		792.104	76.9826		167	3691.75	241.639		4112.65	285.458		167	560.676	55.9502		808.768	75.4679
168	4886.44	523.825		4817.55	523.107		84	615.761	94.1958		788.636	76.3479		168	3708.83	239.609		4122.15	285.376		168	560.376	56.8827		806.351	75.207
169	4934.37	532.209		4835.97	524.082		84.5	610.137	93.763		786.371	76.684		169	3709.02	238.377		4134.59	286.925		169	553.344	56.0682		800.941	74.2581
170	4923.5	524.616		4847.11	523.816		85	600.652	90.8734		778.301	75.2608		170	3724.33	242.696		4141.16	287.26		170	546.783	54.5396		793.743	73.3436
171	4943.21	533.447		4866.7	527.654		85.5	597.762	92.0882		772.887	74.5222		171	3731.25	242.131		4147.99	288.489		171	542.862	54.4375		789.959	73.1216
172	4967.14	531.921		4883.59	529.319		86	593.036	90.5302		770.526	74.3515		172	3738.73	242.706		4152.43	289.46		172	540.314	54.4358		786.511	72.6731
173	4968.13	533.368		4893.83	529.303		86.5	590.617	89.0048		766.014	73.7079		173	3747.02	243.225		4163.87	289.931		173	536.228	53.5835		780.599	71.7371
174	4991.57	529.22		4908.47	531.998		87	581.098	88.8957		759.848	72.447		174	3754.05	244.672		4172.2	288.71		174	531.385	53.0344		777.575	71.6649
175	5022.65	532.728		4918.66	533.475		87.5	578.403	88.3018		755.749	72.2766		175	3769.62	246.082		4181.59	289.705		175	525.16	52.6521		772.933	71.9503
176	5028.83	533.767		4927.65	533.697		88	572.706	86.7948		751.223	71.2118		176	3772.18	247.646		4197.48	290.369		176	518.243	52.7833		767.784	70.7565
177	5043.59	537.433		4941.52	532.992		88.5	569.355	86.2523		748.23	72.037		177	3793.37	252.679		4203.52	290.854		177	516.242	52.88		764.762	71.0543
178	5070.29	541.785		4956.84	537.349		89	568.06	84.9743		744.798	71.0355		178	3795.42	251.218		4224.36	296.78		178	513.907	51.9649		758.043	69.3653
179	5075.63	542.725		4968.1	540.125		89.5	559.919	85.0881		737.865	69.4674		179	3804.05	251.612		4235.6	296.956		179	508.495	51.1042		754.091	68.8106
180	5085.62	538.711		4985.64	537.19		90	557.4	83.5946		734.005	69.6323		180	3817.62	249.597		4245.19	297.543		180	503.594	50.3453		749.784	69.1673
181	5114.33	542.984		5001.19	539.076		90.5	550.174	82.0073		728.622	68.341		181	3815.09	251.32		4253.03	298.888		181	497.739	48.7459		746.272	68.5104
182	5133.69	549.333		5017.49	541.289		91	543.522	81.9047		723.488	68.6114		182	3827.25	249.95		4259.99	300.63		182	492.932	50.0192		740.741	68.9651
183	5128.78	546.116		5030.65	540.766		91.5	539.49	80.9258		718.336	69.4376		183	3848.91	252.468		4274.33	300.783		183	489.002	49.3335		734.028	69.1805
184	5144.1	555.15		5042.8	541.641		92	534.082	80.8526		713.67	67.197		184	3838.28	253.017		4275.32	300.105		184	487.142	49.3434		731.243	67.8394
185	5152.11	554.952		5062.49	545.549		92.5	531.818	78.9801		708.932	67.0778		185	3852.65	254.233		4286.16	300.039		185	481.47	48.4599		727.971	68.9837
186	5170.93	558.086		5072.61	547.096		93	527.126	81.3328		703.328	66.8836		186	3855.58	254.952		4289.65	299.127		186	478.106	48.9387		723.829	69.1409
187	5175.16	561.567		5084.32	546.691		93.5	520.376	79.5971		700.811	66.2817		187	3871.56	256.555		4300.19	300.296		187	471.331	49.0571		720.057	68.8429
188	5190.38	563.874		5100.95	546.735		94	515.711	78.0695		694.028	65.3549		188	3881.84	257.404		4313.12	304.627		188	467.436	48.1601		716.984	68.8022
189	5190.65	563.732		5120.59	550.381		94.5	511.277	76.717		691.801	65.6068		189	3892.4	255.689		4326.01	302.842		189	465.71	46.8128		710.768	67.895
190	5222.03	563.667		5130.79	553.315		95	507.998	75.4052		688.632	65.0643		190	3886.29	255.591		4331.25	304.826		190	461.245	46.5191		710.197	67.7478
191	5227.56	566.736		5150.5	555.428		95.5	504.357	76.2728		682.51	63.8365		191	3899.18	258.455		4336.6	304.605		191	460.077	47.1473		705.5	67.6008
192	5242.12	564.951		5163.43	556.233		96	496.954	73.6768		679.22	63.7012		192	3915.88	259.325		4345.25	304.236		192	453.382	46.5394		701.972	67.417
193	5265.5	569.975		5179.59	557.846		96.5	496.319	73.0568		674.042	63.1835		193	3915.59	258.564		4356.45	305.32		193	451.666	45.27		698.284	67.9095
194	5268.09	571.487		5182.47	556.559		97	489.263	72.7052		668.685	63.0472		194	3936.85	260.431		4371.44	306.346		194	444.929	43.9176		690.901	66.4475
195	5304.61	580.253		5198.08	556.755		97.5	490.048	71.9353		666.663	63.0463		195	3933.78	261.194		4377.8	308.135		195	444.455	45.6289		687.968	66.5039
196	5301.34	577.448		5212.33	560.61		98	481.874	71.9971		661.691	61.8079		196	3947.2	262.929		4387.39	309.437		196	439.611	45.1219		685.253	66.1503
197	5327.43	576.184		5230.41	562.603		98.5	479.501	71.5337		658.909	62.0776		197	3952.55	265.629		4395.01	309.492		197	435.602	46.2885		681.839	66.1238
198	5335.7	582.38		5239.66	563.994		99	474.665	69.821		652.483	61.9304		198	3958.36	262.916		4400.43	309.19		198	433.585	44.3816		678.058	66.7142
199	5348.46	575.727		5255.89	565.355		99.5	468.545	69.7165		649.14	60.5722		199	3968.34	264.863		4404.38	311.178		199	427.855	44.3437		673.708	65.0529
200	5345.65	580.282		5272.99	566.124		100	462.275	68.9522		646.121	60.2071		200	3982.09	265.41		4411.37	311.668		200	421.417	43.8718		669.983	64.4974
201	5352.66	582.027		5293.35	567.556		100.5	462.084	67.6067		640.422	60.3637		201	3981.81	268.072		4426.67	313.813		201	417.918	43.9891		663.899	64.7473
202	5374.99	588.378		5296.98	569.173		101	455.964	67.4894		636.262	60.0111		202	3991.44	262.787		4436.55	314.113		202	416.072	42.6776		660.535	64.2344
203	5389.37	591.619		5314.47	572.915		101.5	456.215	65.6282		634.035	58.3312		203	3995.91	266.753		4449.27	316.02		203	415.388	42.0775		659.818	63.5186
204	5393.58	587.724		5323.45	571.065		102	447.71	65.6734		628.7	59.0268		204	4004.11	267.65		4458.11	313.951		204	409.463	42.5897		651.88	63.2379
205	5404.52	588.165		5339.12	572.672		102.5	443.809	66.1779		624.493	58.0528		205	4009.13	271.972		4462.18	314.418		205	407.25	43.3647		649.969	62.9859
206	5427.05	593.242		5353.93	577.025		103	441.329	64.2587		620.882	58.0045		206	4016.82	269.807		4471.58	314.693		206	401.342	41.6431		644.657	62.3027
207	5431.65	586.81		5369.65	579.223		103.5	439.203	64.9218		615.187	56.4123		207	4009.85	265.603		4481.76	314.493		207	399.914	41.2799		642.929	63.2159
208	5453.87	596.783		5385.3	580.227		104	435.545	63.3085		613.213	57.433		208	4034.48	273.754		4490.41	315.852		208	395.68	39.8505		638.471	62.8557
209	5457.54	589.613		5396.09	579.053		104.5	432.678	62.5986		609.026	56.9314		209	4033.57	270.601		4499.35	316.749		209	396.662	39.8262		636.552	62.871
210	5472.31	594.17		5410.31	580.254		105	426.616	61.6551		605.363	56.3296		210	4042.98	269.557		4508.8	316.085		210	390.837	39.9432		631.837	62.5412
211	5487.17	594.411		5424.09	581.196		105.5	421.456	61.5546		601.771	57.0882		211	4060.29	275.233		4512.64	317.972		211	388.972	40.2716		628.735	62.802
212	5504.92	601.169		5437.38	581.523		106	418.194	61.4293		599.597	55.9672		212	4068.8	277.164		4524.31	317.611		212	381.514	41.2385		627.349	62.7588
213	5500.98	592.568		5455.81	586.172		106.5	417.824	61.0748		595.263	55.5245		213	4063.51	275.912		4532.53	320.006		213	381.538	39.9485		622.533	62.2825
214	5532.68	596.778		5477.42	589.271		107	411.089	59.6798		589.997	55.3101		214	4071.43	273.146		4543.37	320.21		214	374.587	39.288		618.74	62.6782
215	5535.72	596.299		5483.39	591.662		107.5	408.432	58.8223		588.318	55.2264		215	4079.49	273.507		4554.91	321.21		215	372.708	38.9793		615.494	62.6784
216	5557.17	604.964		5500.72	592.945		108	405.185	58.1606		584.15	54.3513		216	4088.67	275.685		4562.37	321.534		216	371.85	37.8878		613.388	62.4893
217	5559.8	602.195		5516.28	596.57		108.5	401.171	59.9463		580.305	54.3197		217	4100.53	276.629		4567.4	320.327		217	365.923	38.445		609.173	61.6097
218	5583.56	605.873		5533.13	598.597		109	399.693	58.1186		577.534	53.2365		218	4110.26	276.324		4575.62	320.283		218	367.313	38.3577		605.94	61.1515
219	5589.23	605.27		5544.57	596.274		109.5	395.624	57.5201		573.402	52.9568		219	4114.63	278.709		4578.77	320.299		219	362.626	38.3127		603.97	61.6964
220	5597.42	613.284		5558.9	599.981		110	393.398	58.5659		570.36	52.8599		220	4120.15	277.768		4593.56	322.005		220	359.793	38.8027		599.621	60.8737
221	5599.87	613.232		5568.32	600.406		110.5	390.689	56.9812		566.622	52.5937		221	4126.42	280.793		4599.5	321.029		221	357.281	37.5999		595.499	60.9651
222	5595.39	617.271		5581.02	600.703		111	382.483	56.2791		562.26	51.8381		222	4125.23	279.577		4605.83	321.708		222	349.108	38.2576		590.43	60.1421
223	5621.87	615.534		5594.51	604.796		111.5	382.077	56.2793		559.669	51.7716		223	4146.09	279.309		4618.44	319.224		223	350.376	37.6778		589.62	60.4888
224	5636.73	618.033		5609.07	604.325		112	381.77	54.1129		558.15	50.8546		224	4141.36	279.342		4622.63	319.718		224	351.559	36.0694		588.623	59.9283
225	5659.13	625.406		5625.86	605.678		112.5	375.667	54.8013		551.615	50.8516		225	4149.57	281.731		4627.24	320.58		225	348.09	36.3383		583.752	60.4381
							113	373.546	53.614		551.065	51.4497									226	343.999	35.9922		581.268	60.1488
							113.5	372.34	52.7263		547.872	51.6551									227	339.808	36.4781		576.399	59.7926
							114	366.365	53.9357		542.87	50.3888									228	337.493	36.4306		574.952	60.5478
							114.5	363.447	52.4339		540.186	49.4277									229	336.537	36.6702		573.482	59.8227
							115	358.603	51.6005		536.135	49.3388									230	328.958	34.9605		567.547	59.1009
							115.5	356.415	50.7894		532.285	48.6029									231	329.588	34.737		564.633	59.0747
							116	354.345	51.7318		530.111	49.3238									232	328.017	35.221		563.193	60.1379
							116.5	350.141	49.7352		526.622	48.9468									233	321.12	35.35		560.215	59.786
							117	346.822	50.5579		524.307	49.3197									234	320.366	34.5275		558.465	60.6252
							117.5	347.221	50.0417		520.565	47.9233									235	320.891	33.887		555.303	59.2533
							118	342.658	50.0966		518.371	47.692									236	315.2	34.2271		552.385	59.1433
							118.5	341.35	48.4399		514.486	47.9276									237	312.326	34.5026		548.271	59.3323
							119	335.293	48.3065		513.737	48.1187									238	309.428	33.2611		545.197	58.9503
							119.5	335.432	48.1414		508.404	46.9771									239	309.142	33.5056		542.754	59.2164
							120	334.106	47.4634		505.56	47.0969									240	308.044	32.8818		541.214	59.2531
							120.5	329.065	47.2451		502.294	46.7682									241	303.358	33.6951		535.78	58.3635
							121	325.261	46.1664		500.749	46.1019									242	300.038	32.4429		533.958	57.5306
							121.5	323.475	45.9426		496.582	45.7258									243	302.281	32.3327		531.702	57.9576
							122	320.211	45.4618		492.484	45.1621									244	296.466	32.6086		526.44	56.9482
							122.5	317.709	46.3535		489.287	45.0764									245	293.173	32.8067		522.49	56.9033
							123	316.857	44.5652		487.333	44.048									246	293.934	31.7557		522.372	56.8158
							123.5	313.02	43.6222		482.664	43.9743									247	291.263	31.5506		516.134	55.716
							124	309.217	43.7122		480.111	43.3579									248	285.375	31.1347		513.315	55.1319
							124.5	310.406	44.0268		478.008	44.9776									249	286.219	31.8423		512.876	56.9435
							125	308.072	43.1723		474.791	42.9042									250	283.954	31.0664		508.975	55.1789
							125.5	303.641	42.9228		472.062	42.5236									251	279.863	31.1916		504.754	54.7482
							126	300.84	43.3292		468.471	42.5885									252	278.302	31.2063		502.199	54.9399
							126.5	299.343	41.343		468.296	43.7876									253	280.47	30.2481		502.005	55.8791
							127	292.991	42.1003		461.596	42.3654									254	272.776	31.3922		496.595	55.2532
							127.5	296.155	41.5972		461.089	41.9242									255	274.905	30.4414		495.025	54.2962
							128	293.973	41.916		458.486	42.1413									256	271.07	30.9539		493.169	54.769
							128.5	289.317	39.9341		455.809	41.8684									257	266.277	30.0947		490.654	54.7091
							129	285.741	38.9075		453.341	41.7924									258	264.55	30.0252		485.084	53.7038
							129.5	289.269	40.3187		451.542	41.2899									259	268.241	30.248		484.805	53.7602
							130	283.223	39.1112		448.41	40.7983									260	264.52	29.6377		483.192	53.7037
							130.5	282.478	39.1865		445.479	40.5627									261	260.767	29.8742		478.66	52.7897
							131	277.82	38.8744		444.313	41.168									262	258.241	30.2839		477.068	53.1474
							131.5	274.075	38.8743		441.517	40.2798									263	257.136	30.0036		474.225	52.3113
							132	275.557	39.4673		440.957	39.9709									264	257.392	29.9391		474.031	51.5191
							132.5	271.804	38.0778		437.263	39.8818									265	255.254	29.6928		469.677	51.4551
							133	271.055	36.2843		435.844	40.2316									266	252.736	27.1475		467.772	51.1782
							133.5	267.104	37.2635		431.38	39.5159									267	250.316	28.4712		464.568	51.5766
							134	265.354	37.2922		430.825	38.897									268	245.736	29.1182		463.474	50.5838
							134.5	265.908	37.5256		428.928	38.6991									269	248.808	29.611		460.73	49.9246
							135	262.864	37.1795		425.084	39.8567									270	241.622	27.9614		456.03	51.423
							135.5	261.734	36.5634		423.078	38.9084									271	244.404	28.5515		456.479	50.5214
							136	257.159	36.7147		420.181	39.0105									272	238.747	29.0977		451.737	50.2932
							136.5	254.596	35.7346		416.57	38.2078									273	239.575	27.9258		449.829	50.4244
							137	250.746	36.1466		414.351	38.399									274	234.612	28.1877		448.697	51.327
							137.5	252.502	35.5671		413.23	38.2309									275	234.369	27.4926		445.923	50.1012
							138	245.934	35.2755		407.505	36.9955									276	230.26	28.9405		443.407	50.4651
							138.5	247.405	35.8673		406.678	37.4181									277	229.398	28.6487		442.154	50.4474
							139	245.936	35.5632		404.985	36.7741									278	231.62	28.2616		440.595	50.0858
							139.5	242.865	35.2914		404.963	37.7857									279	227.714	27.324		436.115	49.038
							140	242.596	33.617		402.649	37.27									280	227.917	26.3216		436.26	49.5831
							140.5	237.659	32.9671		397.791	37.3287									281	224.879	26.9117		431.792	49.8782
							141	236.434	33.8534		395.119	37.5148									282	220.325	27.0747		429.225	50.1382
							141.5	235.58	33.6986		393.534	36.4402									283	222.67	27.5099		430.486	50.4388
							142	236.975	32.3941		393.769	37.1355									284	221.51	25.997		428.627	50.3865
							142.5	233.366	34.0892		389.396	36.7082									285	217.731	27.3305		424.606	49.7504
							143	232.382	33.8757		387.462	35.9704									286	214.843	27.4096		422.573	49.1912
							143.5	228.34	32.437		385.25	35.9403									287	215.257	26.4233		420.285	49.1053
							144	227.163	32.605		383.82	35.6202									288	210.734	26.9937		418.847	48.6618
							144.5	223.762	33.0587		379.254	35.964									289	209.552	26.7481		413.811	48.9833
							145	223.729	31.0859		377.366	35.3609									290	210.16	25.3661		413.578	49.1317
							145.5	220.6	31.9527		376.384	35.1639									291	207.31	26.5565		412.227	48.6562
							146	217.482	31.9584		372.047	35.0609									292	205.761	26.3639		409.131	48.775
							146.5	217.736	31.4041		372.175	34.8476									293	207.574	25.7718		410.443	49.1959
							147	215.64	31.5831		368.224	34.4985									294	201.899	26.092		403.908	48.1559
							147.5	213.649	30.3455		365.561	34.2454									295	201.951	25.9939		402.071	48.3638
							148	215.607	31.3859		363.764	34.5156									296	199.588	26.454		400.226	48.5787
							148.5	212.071	30.2175		359.129	33.4332									297	198.935	25.1116		397.048	47.7696
							149	211.388	30.6189		359.514	32.4882									298	202.417	26.0107		397.858	47.5262
							149.5	212.306	30.6985		358.823	32.7112									299	198.827	25.8329		398.231	47.9553
							150	205.811	30.9414		355.439	32.9099									300	196.583	26.0294		392.687	47.5578
							150.5	206.143	29.1172		353.131	32.6271									301	196.126	24.5693		391.689	47.8838
							151	205.684	28.4943		352.846	33.2596									302	193.289	24.869		387.751	46.5906
							151.5	201.699	29.0317		348.882	32.8329									303	192.954	24.9766		385.008	46.4054
							152	201.166	29.0192		346.802	32.8371									304	188.247	24.9664		382.054	46.3287
							152.5	199.738	28.3001		345.297	32.0407									305	187.311	23.9041		379.925	45.5171
							153	198.041	28.8514		344.256	32.3481									306	186.57	24.9596		379.338	45.4154
							153.5	196.897	29.4201		342.75	32.3715									307	185.624	24.857		374.339	43.852
							154	194.369	26.7569		337.704	32.1654									308	184.813	23.6554		373.561	45.1893
							154.5	193.398	28.4699		338.142	31.8154									309	183.604	24.9247		371.186	43.6734
							155	192.875	28.596		335.669	31.9081									310	183.577	24.7847		370.271	44.2654
							155.5	190.91	27.908		334.598	31.7689									311	180.901	24.3185		367.596	43.8162
							156	188.817	27.16		330.448	31.0425									312	177.7	24.1783		365.212	43.5896
							156.5	189.118	28.4224		329.477	30.8642									313	178.025	25.8238		363.076	43.0172
							157	186.084	28.4543		326.534	31.2348									314	178.377	25.033		360.895	43.2111
							157.5	185.387	27.5335		325.795	31.2054									315	178.694	24.4612		359.549	42.8239
							158	186.195	26.6857		324.287	31.5064									316	176.178	23.4891		358.278	43.4008
							158.5	185.066	28.1378		321.872	31.3103									317	173.479	24.7091		356.976	43.2955
							159	182.421	26.937		321.68	31.1903									318	174.089	23.8948		356.192	43.9079
							159.5	180.741	26.5999		319.422	31.1267									319	171.23	23.4164		354.801	43.4099
							160	175.414	26.8246		315.902	30.0634									320	169.031	23.8185		351.167	42.6012
							160.5	177.822	26.578		316.491	30.8369									321	170.744	23.7557		349.915	42.3389
							161	179.097	25.6119		313.48	30.3614									322	170.031	22.7921		348.5	42.4622
							161.5	177.727	26.1475		311.938	30.1341									323	169.327	23.5259		346.033	41.6857
							162	173.78	26.8172		311.135	29.7837									324	164.771	23.9		345.1	41.741
							162.5	173.685	26.9764		308.487	30.1567									325	163.052	23.9237		342.216	41.8072
							163	168.639	26.5111		306.608	29.7471									326	160.302	24.1804		340.779	41.7396
							163.5	171.657	25.6919		306.816	29.7294									327	163.74	22.9225		340.712	41.3922
							164	170.54	26.7693		303.429	29.6325									328	160.537	24.106		336.985	40.6431
							164.5	167.087	25.1714		301.808	28.9397									329	159.741	23.0863		336.454	40.9985
							165	168.653	26.2351		302.028	29.6537									330	162.059	23.0946		336.673	41.0276
							165.5	162.406	26.576		296.738	28.7142									331	155.778	23.9076		330.096	39.7143
							166	164.012	25.0268		296.256	28.7229									332	156.399	22.4256		330.052	39.866
							166.5	162.164	24.1431		294.994	28.7105									333	153.512	22.4725		327.472	39.1257
							167	160.607	24.5875		294.166	28.68									334	153.442	22.5382		326.548	39.6784
							167.5	159.715	25.9085		292.155	28.8829									335	153.729	23.3651		326.722	40.431
							168	158.154	24.0466		290.652	29.0644									336	151.764	21.9081		325.137	40.3197
							168.5	160.107	24.5135		288.152	28.3626									337	153.611	22.4054		322.038	39.8461
							169	154.235	23.2376		284.818	28.5938									338	146.775	21.969		318.127	39.8246
							169.5	156.086	24.678		285.51	28.097									339	149.415	22.8244		317.18	39.0069
							170	151.053	25.2574		282.774	27.6542									340	144.454	23.3371		316.237	39.205
							170.5	155.834	23.202		282.541	28.1553									341	148.818	21.8051		315.262	38.7427
							171	151.482	23.4586		278.365	28.0533									342	144.621	22.1003		310.908	38.8791
							171.5	149.836	24.1985		277.243	28.394									343	143.212	22.0008		308.852	39.0833
							172	148.089	23.8017		275.321	27.8617									344	142.49	21.7241		305.632	37.6122
							172.5	146.892	23.8252		274.841	27.568									345	139.594	22.5042		304.499	37.2732
							173	150.388	23.0859		275.403	27.3844									346	144.868	21.4058		305.46	36.8385
							173.5	146.911	22.9462		271.718	27.3608									347	140.67	21.4566		301.841	36.8479
							174	148.152	24.858		269.264	26.9601									348	141.955	22.9449		300.335	36.5149
							174.5	144.464	24.58		267.906	26.2728									349	138.448	23.2989		299.882	36.3923
							175	144.215	23.3425		267.285	26.3282									350	139.148	22.0087		298.429	36.6394
							175.5	142.004	23.9458		264.235	26.6413									351	135.478	22.3036		294.507	36.554
							176	141.86	24.3509		262.844	25.8613									352	137.414	22.3275		294.316	36.0165
							176.5	138.567	23.3167		258.617	25.918									353	134.733	21.7742		292.81	37.1495
							177	139.203	22.4155		259.317	26.0409									354	133.017	20.9024		289.833	35.5013
							177.5	141.792	23.7743		260.502	26.2339									355	134.078	21.8193		290.343	35.6566
							178	139.873	23.1292		257.504	25.7915									356	132.172	21.9111		287.333	35.7422
							178.5	138.287	23.5209		257.067	25.2027									357	131.694	22.0213		286.577	34.8249
							179	134.62	22.8748		255.3	25.4897									358	129.218	21.5353		283.422	34.4771
							179.5	136.308	23.9242		254.115	24.9646									359	129.364	22.7651		281.844	33.8782
							180	132.698	23.9895		252.477	24.468									360	128.781	22.7533		280.685	33.3743
							180.5	137.802	22.5901		253.306	24.573									361	130.766	21.7881		278.8	33.0117
							181	132.438	22.921		249.885	24.6083									362	128.191	21.84		275.15	33.0878
							181.5	132.992	21.814		250.812	25.1501									363	127.351	20.5019		275.62	32.8599
							182	129.021	22.4656		247.522	24.8375									364	124.567	20.6486		274.701	33.3613
							182.5	128.984	23.026		244.26	24.0786									365	126.275	21.4737		270.839	32.8281
							183	130.016	22.6238		244.79	24.1972									366	125.71	21.3784		270.338	32.1262
							183.5	129.429	21.595		243.975	23.4216									367	122.045	21.4548		269.014	31.5072
							184	125.511	22.3046		240.295	24.102									368	121.708	21.741		267.871	33.0306
							184.5	123.254	21.8925		238.367	24.4944									369	118.596	20.9622		264.206	32.6502
							185	124.956	22.4393		237.517	24.3724									370	122.02	21.0854		262.997	32.4155
							185.5	125.238	21.9391		237.522	23.4683									371	119.42	21.2027		260.436	30.8007
							186	126.308	22.2278		236.493	23.2383									372	121.195	21.2607		260.927	31.2692
							186.5	125.869	22.8919		236.607	22.6755									373	120.025	22.662		259.815	30.1829
							187	124.021	22.1368		232.841	23.4488									374	117.486	21.4385		255.326	31.24
							187.5	122.06	21.7887		229.553	22.2045									375	117.745	21.2773		254.872	30.6133
							188	118.208	22.4688		227.637	22.073									376	114.333	21.6419		252.447	30.7147
							188.5	118.102	22.1517		228.355	22.9898									377	112.283	21.5119		252.193	30.4681
							189	118.599	21.5712		226.161	21.675									378	116.482	20.7152		251.438	29.9157
							189.5	119.881	21.8411		224.899	21.3424									379	116.549	21.0047		248.769	29.5196
							190	118.059	22.1316		222.282	21.5545									380	113.911	21.7537		245.581	29.5476
							190.5	115.703	20.7998		219.317	21.3564									381	112.497	19.8159		244.84	30.2658
							191	116.38	21.2975		219.933	20.7176									382	112.057	20.6489		244.057	29.24
							191.5	111.913	22.1204		216.441	20.634									383	107.562	21.4879		241.903	29.7306
							192	115.276	21.2136		215.306	20.2749									384	109.783	20.8034		242.408	29.6763
							192.5	112.019	20.3234		212.903	20.5449									385	107.431	19.996		238.362	29.9905
							193	110.252	19.9472		211.287	20.4128									386	107.542	19.4035		237.531	29.6912
							193.5	108.658	21.9327		210.601	20.9083									387	106.542	20.8946		234.939	28.9758
							194	110.684	21.5038		208.681	20.3073									388	107.667	20.8887		234.097	28.7161
							194.5	109.212	21.688		207.85	20.7716									389	107.085	20.866		233.276	29.1354
							195	106.858	21.8734		205.455	20.4924									390	104.599	20.6265		232.263	29.7976
							195.5	107.935	20.8614		203.935	19.7506									391	103.186	20.2663		230.238	29.408
							196	106.438	21.4741		203.333	19.6881									392	103.018	20.9746		227.802	28.2311
							196.5	106.825	20.7658		200.595	19.169									393	105.025	20.0463		228.823	28.6735
							197	105.703	21.0308		199.625	19.1117									394	101.911	20.5457		225.448	28.2048
							197.5	106.756	20.6917		199.142	19.4929									395	100.749	20.8003		223.359	27.9864
							198	105.333	21.0791		195.873	19.2264									396	102.915	20.6387		221.271	28.3535
							198.5	104.301	21.1998		193.924	18.3531									397	100.339	21.1276		218.289	27.1133
							199	103.463	21.0202		194.394	18.6892									398	99.5032	20.9705		218.066	26.8889
							199.5	102.865	20.9402		191.639	18.6945									399	101.246	20.2023		215.731	27.1035
							200	103.761	21.1472		191.909	18.6944									400	99.1653	20.867		215.762	27.3076
							200.5	100.573	20.1018		188.767	18.259									401	97.5062	19.9752		213.975	27.4875
							201	95.2641	20.0085		186.319	18.6658									402	93.794	19.6772		213.182	28.2272
							201.5	98.6247	20.2792		186.692	18.0308									403	96.2777	20.0091		210.762	26.9958
							202	99.2747	20.595		185.224	17.5938									404	97.8452	20.0987		211.115	27.0001
							202.5	100.842	20.6023		184.014	17.7628									405	96.6101	20.6046		210.676	27.8021
							203	98.132	21.0711		182.844	17.5881									406	95.6331	21.0918		209.531	27.1402
							203.5	95.5569	20.3828		180.211	17.9433									407	94.57	19.6821		207.159	27.3791
							204	95.992	20.3686		179.265	17.9567									408	92.6293	20.0634		204.901	26.9138
							204.5	96.7447	20.371		179.011	17.246									409	93.1453	20.0083		203.701	25.8564
							205	97.3423	20.7832		178.594	17.5263									410	95.3328	20.2947		204.152	26.5384
							205.5	93.8467	21.6353		175.408	16.9106									411	92.5142	21.1019		202.354	26.4946
							206	94.8951	20.398		175.386	16.954									412	92.2064	20.3202		201.437	26.325
							206.5	92.407	19.8523		174.142	17.3792									413	91.3432	19.2662		202.074	27.3531
							207	96.4195	20.6569		173.54	17.0285									414	92.1142	20.6848		199.731	26.6364
							207.5	94.9585	20.0813		173.243	17.342									415	91.3996	19.7931		198.622	26.1081
							208	91.1251	19.9173		172.756	17.8014									416	86.5499	19.9712		196.162	25.7838
							208.5	92.3987	19.7561		171.358	17.1872									417	88.5653	19.6943		193.39	25.1293
							209	88.3201	20.2077		168.878	17.2542									418	87.7195	19.687		193.448	26.0458
							209.5	86.9251	20.5026		166.216	17.0932									419	87.2968	19.8545		190.731	25.3777
							210	89.5636	20.6505		167.132	16.7482									420	87.2652	20.3807		190.931	25.3087
							210.5	86.8379	19.7921		165.558	17.5289									421	83.3883	19.6286		188.515	25.552
							211	88.7729	19.7919		165.694	16.7324									422	85.3451	19.7084		189.391	25.1545
							211.5	86.8558	20.53		165.4	17.04									423	84.6074	20.232		188.022	25.1001
							212	83.9762	20.4479		161.427	16.7588									424	80.7211	20.2727		185.281	25.3783
							212.5	86.5035	20.1834		162.518	17.3529									425	85.2581	19.8518		184.898	24.9199
							213	83.1109	20.2612		160.988	17.1702									426	81.3469	20.1298		183.505	24.6981
							213.5	86.1607	20.5736		160.469	16.6									427	83.1431	20.3485		183.583	24.4756
							214	84.3884	20.5008		158.422	15.6369									428	85.1571	20.0638		182.799	23.6629
							214.5	81.398	20.6628		156.285	16.0041									429	78.693	20.5992		178.925	23.5462
							215	83.6764	19.2788		156.747	16.4405									430	81.8546	19.0538		179.292	24.0169
							215.5	81.9965	19.8596		154.18	15.9148									431	78.0293	20.1659		176.2	23.1928
							216	83.5129	19.121		154.45	16.8603									432	79.8413	19.3905		178.034	24.3748
							216.5	81.4549	20.1284		152.09	15.8667									433	77.2959	20.3684		173.028	23.0982
							217	80.6536	19.1899		150.733	15.7509									434	78.3884	19.3434		173.935	23.6434
							217.5	82.3652	19.4054		148.726	15.779									435	80.8443	19.3341		172.254	24.0286
							218	78.1321	20.2489		148.436	15.4144									436	76.6747	20.1331		172.049	23.9967
							218.5	80.2269	20.2663		146.934	15.891									437	76.9936	20.3645		169.861	23.8372
							219	80.2407	18.6138		147.306	16.3132									438	76.152	18.7429		168.225	23.4511
							219.5	78.372	19.6435		144.357	15.24									439	77.2604	19.523		167.151	23.3501
							220	77.2634	20.2343		143.151	15.2725									440	73.5042	20.3416		165.224	23.2547
							220.5	78.0165	19.9273		143.623	14.9424									441	76.7235	19.7988		166.118	22.5355
							221	75.8209	20.0742		140.336	14.4281									442	73.6205	20.1458		163.486	22.6011
							221.5	79.0256	19.6307		139.782	14.4444									443	75.0966	19.8907		162.324	21.9782
							222	75.7619	20.0809		138.174	14.1045									444	74.6727	19.9991		160.022	21.8298
							222.5	73.671	19.1926		137.544	14.504									445	71.3778	19.0926		158.487	22.1391
							223	74.3233	18.5903		136.796	14.3689									446	74.1926	18.5008		157.698	21.7382
							223.5	74.9102	19.0317		134.948	14.1294									447	70.646	19.3697		153.26	20.4633
							224	75.806	19.0692		135.61	14.6439									448	71.7186	19.3466		155.058	21.5572
							224.5	70.0014	19.3673		132.478	13.7168									449	67.6141	19.391		151.08	21.1501
							225	73.348	18.9868		132.7	13.6468									450	71.9686	19.1191		150.889	20.366
							225.5	70.6232	19.5008		131.248	13.7508									451	70.3994	18.962		150.102	20.5064
							226	71.0731	19.3958		129.976	13.7711									452	68.0932	19.6921		148.43	20.1416
							226.5	70.3935	19.1549		130.006	13.3897									453	68.4149	19.1961		147.031	19.6677
							227	72.6771	19.1376		130.285	13.3012									454	69.133	19.3987		148.425	20.1635
							227.5	67.9299	18.3776		126.42	13.0258									455	66.5568	18.4612		145.263	20.1009
							228	67.6449	18.6301		124.726	13.297									456	66.2962	18.815		143.671	19.7903
							228.5	69.005	19.3128		125.022	12.917									457	67.1017	19.4016		142.617	18.9301
							229	70.2218	19.6527		124.039	12.3849									458	67.9567	19.7732		141.572	19.146
							229.5	66.1382	19.6645		121.358	12.7427									459	64.388	19.6319		138.341	18.6241
							230	67.0325	19.711		120.477	12.1962									460	65.1215	19.8208		138.445	18.7453
							230.5	66.9383	19.8102		120.064	11.9635									461	66.8636	19.7807		137.73	18.4071
							231	65.2182	19.0703		118.862	12.2362									462	63.5551	19.0354		136.64	18.7422
							231.5	67.6842	18.575		117.935	12.2011									463	66.2254	18.644		134.119	18.4465
							232	68.5989	19.0213		116.725	11.6697									464	68.3309	19.0288		133.083	17.6251
							232.5	65.095	19.7437		114.705	11.6648									465	64.8308	19.6062		131.775	18.3696
							233	64.2539	18.9771		112.78	11.9408									466	62.8303	18.996		128.765	18.1345
							233.5	64.3551	19.9759		113.296	11.4914									467	62.0688	19.8214		129.052	17.6178
							234	60.7354	19.1518		110.017	11.3506									468	59.0761	19.2612		127.471	18.2948
							234.5	64.4435	19.7812		110.363	11.3108									469	62.5804	20.0581		125.863	17.1501
							235	60.8278	19.4002		108.562	10.9335									470	59.7034	19.5609		124.885	17.451
							235.5	61.9221	19.2064		108.167	11.2505									471	62.2316	19.0232		124.129	17.6774
							236	59.4411	18.2153		106.501	10.7729									472	57.8457	18.3367		122.653	17.5228
							236.5	59.5515	19.0673		104.958	10.7205									473	56.967	19.2701		119.5	16.4261
							237	60.0843	20.8034		104.015	10.5666									474	60.0698	20.6116		118.871	16.2317
							237.5	61.0798	19.3649		101.98	9.32519									475	58.2845	19.6098		118.917	16.2582
							238	63.6418	19.0461		104.44	10.0571									476	60.3455	19.3252		118.302	15.6877
							238.5	61.0679	19.0533		100.486	9.22653									477	60.302	19.0218		115.351	15.4329
							239	60.4094	19.0255		99.3658	9.25941									478	56.5355	19.5497		113.801	15.6962
							239.5	60.8478	18.6657		97.5807	9.55013									479	58.425	18.7872		113.379	15.7109
							240	58.3199	18.7163		96.379	9.27528									480	57.0301	18.9164		111.979	16.2107
							240.5	61.5806	18.6789		96.9327	10.0451									481	57.9655	18.9528		110.577	15.2786
							241	58.395	18.763		94.6126	9.24172									482	53.0376	19.6143		107.765	14.8654
							241.5	57.63	19.1115		94.85	9.70439									483	56.2495	19.0838		109.097	15.0377
							242	56.7049	17.9626		91.7433	9.46508									484	54.8858	18.1459		105.499	15.239
							242.5	55.7406	18.6625		91.4636	8.765									485	55.1259	18.7287		104.292	14.5617
							243	53.742	19.5586		90.9115	9.3878									486	52.8186	19.5318		105.027	14.9628
							243.5	52.8687	19.8901		89.2838	8.07258									487	55.4252	19.5006		103.915	15.1368
							244	58.0746	18.4786		88.6869	8.7956									488	56.3552	18.6898		102.338	14.8421
							244.5	51.8288	19.2554		85.9872	9.04544									489	49.9143	19.3674		99.1379	14.2377
							245	52.8754	18.7886		86.4077	8.73598									490	50.8133	19.0979		100.402	14.9184
							245.5	53.1438	19.6229		84.769	8.80877									491	54.9751	19.1896		98.6496	14.1592
							246	50.4184	19.8024		82.6307	8.77506									492	50.9742	19.573		96.4338	14.5615
							246.5	54.5206	20.1172		84.8011	8.46011									493	53.5086	20.1696		97.5972	13.2767
							247	54.7823	19.4267		83.8786	8.2839									494	53.5288	19.4433		97.1483	13.8171
							247.5	57.1589	19.5116		83.6012	8.4969									495	53.5749	20.1442		96.0769	13.4116
							248	51.7822	19.8928		81.2193	8.40184									496	51.5537	19.762		93.798	13.6419
							248.5	52.4046	18.5111		80.7839	8.47834									497	51.9476	18.3846		93.0824	13.9581
							249	50.574	18.4567		80.1888	8.39995									498	48.4242	18.7898		91.0916	13.1917
							249.5	51.8903	18.6		78.7666	8.4116									499	50.7416	18.6469		90.623	13.4834
							250	50.7221	19.6897		78.0681	7.93846									500	50.5735	19.6287		89.8958	12.7813
							250.5	49.0404	19.6982		76.5497	7.67431									501	49.2999	19.542		88.8892	12.6278
							251	49.7371	19.5632		75.6953	8.06417									502	47.4	19.7952		87.3908	12.8018
							251.5	48.2295	19.3781		75.6525	8.17719									503	46.3393	19.6162		86.225	12.6697
							252	45.9433	19.2263		72.8574	7.44914									504	47.0992	18.9709		85.271	12.6138
							252.5	48.4857	19.694		73.3345	7.2255									505	48.3819	19.6362		85.2421	12.0486
							253	47.6176	19.7088		70.8531	7.39077									506	47.2888	19.526		81.1785	11.5334
							253.5	46.2402	19.0768		71.1859	7.55062									507	47.0622	18.8282		80.7695	11.3082
							254	46.0636	19.6176		69.4669	7.33667									508	46.0656	19.5672		80.5369	11.635
							254.5	47.2298	18.6351		69.8395	7.8255									509	46.2227	18.665		79.3578	11.5929
							255	45.0858	18.9151		67.8356	7.29477									510	46.5438	18.682		78.011	11.253
							255.5	44.113	18.805		67.6108	7.69855									511	43.5196	18.8665		77.6379	11.6352
							256	44.9273	18.616		66.2418	7.63563									512	44.5088	18.5354		74.637	10.8747
							256.5	42.6826	19.0004		64.6154	7.71084									513	42.6449	18.9538		73.9977	11.0943
							257	43.8856	18.1975		64.6279	7.35028									514	43.4707	18.2565		73.2653	11.0422
							257.5	44.8825	18.9736		65.0993	7.66981									515	44.3517	18.9337		72.5335	10.7513
							258	45.8252	19.664		63.0385	6.64484									516	44.1708	19.8618		72.7441	10.5131
							258.5	45.1525	18.9535		62.2466	7.39795									517	42.2621	19.3939		72.3067	11.18
							259	48.1859	18.3493		63.2867	7.37842									518	47.703	18.3849		72.0556	10.6304
							259.5	41.5832	18.5941		60.161	6.91268									519	40.2095	18.804		69.3764	10.2565
							260	43.9183	18.4435		59.4284	7.02857									520	41.4933	18.7533		68.0308	10.0655
							260.5	45.554	18.3468		59.4827	6.21971									521	43.309	18.7559		68.0956	10.0221
							261	43.5012	18.8628		58.4295	7.01846									522	42.7597	18.9108		65.1138	9.74848
							261.5	41.2069	19.2469		56.2084	6.79154									523	39.3117	19.2837		64.1783	9.71794
							262	40.2516	18.6447		54.6632	6.76133									524	40.1913	18.4841		64.0875	10.2752
							262.5	44.894	17.7037		55.6608	6.29441									525	44.0259	17.8184		64.6221	9.76539
							263	41.8713	19.1074		52.9754	6.08561									526	42.6358	18.9494		61.6877	9.57378
							263.5	42.4712	19.2956		51.6863	6.5453									527	41.4709	19.2689		59.9944	9.12916
							264	41.6455	18.8456		51.0062	5.9935									528	40.1507	18.986		58.9276	9.03534
							264.5	40.3961	19.0096		49.2566	5.29988									529	39.5912	19.1276		58.7841	8.74275
							265	39.6756	18.4007		49.2139	6.51153									530	39.9579	18.2897		58.8009	9.77668
							265.5	40.2416	18.8621		48.2311	5.68874									531	38.3101	19.0115		55.5495	8.3381
							266	39.0134	18.7259		47.6273	5.32943									532	38.2005	18.7744		56.706	8.49131
							266.5	36.4731	19.4852		45.1782	5.7894									533	35.1392	19.6506		54.1315	9.42511
							267	37.2845	20.5437		45.7691	5.30945									534	37.2412	20.5177		55.3193	8.89649
							267.5	35.8764	19.1074		43.5264	5.43774									535	35.1435	19.1738		52.4359	8.46817
							268	36.8362	19.1762		44.0935	5.40414									536	36.4575	19.2234		53.0688	8.20142
							268.5	37.5799	18.4718		41.3491	5.50222									537	35.7115	18.7035		51.6647	8.63976
							269	35.3161	18.3274		41.31	5.75455									538	34.4809	18.3266		48.7668	8.05866
							269.5	37.1684	18.6799		41.9708	5.42272									539	34.5426	19.1554		48.8229	8.00743
							270	35.288	17.9601		39.8116	5.78094									540	35.4536	17.8525		47.6358	8.56908
							270.5	37.3803	18.9514		40.7653	5.7348									541	42.5579	18.4831		48.6818	8.70327
							271	34.9864	19.358		37.9351	4.98062									542	39.6806	19.669		46.057	8.52304
							271.5	35.8274	18.1465		37.2056	5.57681									543	34.9315	18.2314		45.4501	8.55243
							272	36.0404	19.2537		37.9463	4.68008									544	33.2783	19.6902		44.5921	7.87214
							272.5	34.6655	18.2306		34.1788	4.84967									545	34.1747	18.2933		44.2265	8.96829
							273	34.1959	19.089		34.2606	4.54902									546	31.936	19.468		42.4822	7.84946
							273.5	34.7674	18.9539		34.9408	4.44714									547	30.8383	19.689		42.3283	7.13192
							274	35.3656	18.0721		34.138	4.79035									548	33.0783	18.647		40.7478	6.97071
							274.5	35.7359	19.1501		32.4944	3.85887									549	34.5653	19.3756		40.9832	7.11119
							275	34.3829	19.1697		30.1335	4.81851									550	32.1823	19.4376		38.7055	7.49562
							275.5	32.0708	18.158		28.7124	4.72703									551	30.771	18.3453		36.6992	7.13594
							276	30.6554	18.2504		29.0094	4.81821									552	30.0666	18.3711		36.0617	6.91837
							276.5	29.722	19.3001		28.2876	4.13566									553	29.5143	19.3269		35.825	6.5508
							277	34.695	18.3555		29.4586	3.65524									554	29.9675	19.2559		34.8809	6.13956
							277.5	31.0003	18.7555		26.3499	3.55113									555	28.4937	19.0987		34.0889	6.23754
							278	31.2761	18.8202		25.4305	3.21808									556	27.9447	19.3721		31.8459	5.89378
							278.5	31.2529	18.1869		23.8856	3.52066									557	29.5524	18.4635		31.5763	6.15406
							279	31.2433	19.4035		24.732	3.50347									558	29.7035	19.6473		29.3391	5.99084
							279.5	30.6732	18.7826		22.9423	2.86804									559	29.046	19.0279		28.7201	5.50814
							280	31.5421	18.2757		22.1048	3.40681									560	28.1295	18.8536		28.259	5.68946
							280.5	30.3173	17.9579		20.7803	2.94795									561	28.1108	18.2631		26.9145	5.42789
							281	29.4694	19.1266		19.6384	2.58683									562	29.7927	19.009		26.0669	4.76629
							281.5	30.02	19.6434		20.2305	2.50387									563	28.1911	19.895		25.8899	4.6638
							282	30.4209	18.8773		19.2661	2.54256									564	29.618	18.9695		24.0455	4.33671
							282.5	29.3944	19.2441		16.6045	2.35157									565	27.571	19.5098		22.2868	4.38387
							283	27.049	17.5623		16.7509	2.87423									566	25.7065	17.7318		22.4447	4.59989
							283.5	28.8998	17.8894		17.1131	2.81203									567	28.0425	18.1159		22.3267	4.19784
							284	28.7227	19.0571		16.733	2.63238									568	28.9078	18.8397		21.2657	3.74807
							284.5	26.8504	18.2708		15.0255	2.62353									569	25.8246	18.3816		18.5674	3.69886
							285	28.1971	17.8108		15.8988	2.19918									570	27.6455	17.8306		19.5307	3.51685
							285.5	27.1139	19.0114		13.6572	1.64738									571	26.9613	19.0215		18.1543	2.91193
							286	28.3527	17.9182		14.4298	2.39672									572	28.1293	17.9232		18.2029	3.22724
								26.2323	17.6571		12.0002	2.20833									573	25.6475	17.7439		15.2455	3.1113
								25.5317	19.6574		12.2508	1.27596									574	25.4466	19.6662		15.1969	2.36252
								28.4886	18.5182		12.716	2.08632									575	26.0386	18.945		13.6863	2.22013
								28.1496	17.7764		11.2478	1.76557									576	27.0453	17.9388		12.4668	2.09811
								25.7228	19.6992		9.46579	1.61971									577	25.1	19.7883		11.864	1.83245
								25.4891	18.0069		8.71698	1.98949									578	23.9746	18.2359		10.7405	2.51272
								24.3482	19.5843		8.28597	1.14744									579	23.9362	19.6317		9.90621	1.80031
								24.3476	18.4361		8.26377	1.90784									580	21.771	18.7954		9.04767	1.83714
								25.6902	19.2102		7.26861	1.55044									581	24.9822	19.2663		9.67364	2.17164
								24.7306	19.2587		6.14446	1.5534									582	24.3259	19.3088		7.66266	1.84578
								25.8367	19.2493		5.11014	1.19846									583	23.1447	19.6488		5.91665	1.31092
								24.8012	19.156		5.50145	0.956955									584	22.0714	19.6018		5.21489	1.34639
								21.2095	18.8094		3.60012	1.41824									585	20.3454	18.945		2.61497	1.44245
								24.741	18.9295		3.34948	0.715372									586	24.9384	18.9035		3.44053	0.889396
																					587	23.756	18.9088		2.32512	1.23694

[truncated: 12 more sheets: 5-SD1, 5-SD2, 5-1-SD1, 5-2-SD1, 6-SD1, 6-SD2, 6-SD3, 6-SD4, 6-1-SD1, 6-1-SD2, 6-2-SD1, 6-3-SD1]
