# Supplementary figures and images for: CTP and parS coordinate ParB partition complex dynamics and ParA-ATPase activation for ParABS-mediated DNA partitioning
Source: eLife journal article supplement (doi:10.7554/elife.65651), 2021-07-21

— ParB<sub>F</sub><sup>1-42</sup>-mCherry elution profile

— Standard proteins

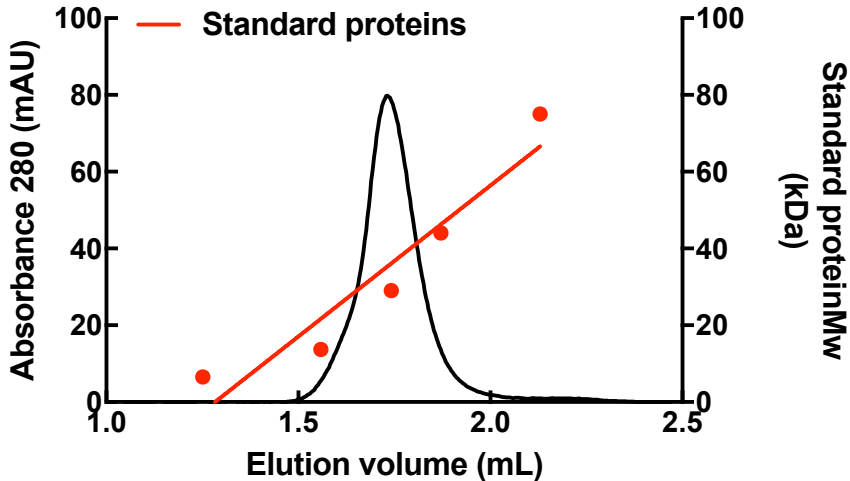

Supplement: supp [file elife_poa_e65651_Figure_2_figure_supplement_1.pdf › elife_poa_e65651_Figure_2_figure_supplement_1.pdf]

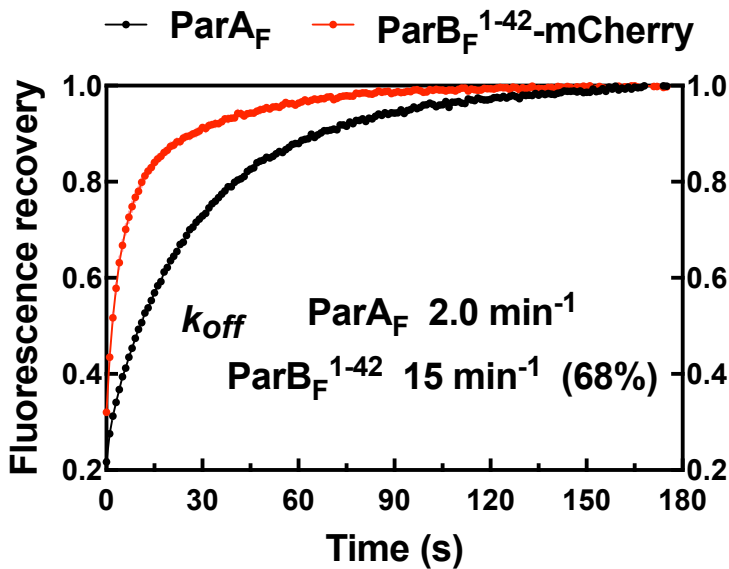

Supplement: supp [file elife_poa_e65651_Figure_2_figure_supplement_2.pdf › elife_poa_e65651_Figure_2_figure_supplement_2.pdf]

**A**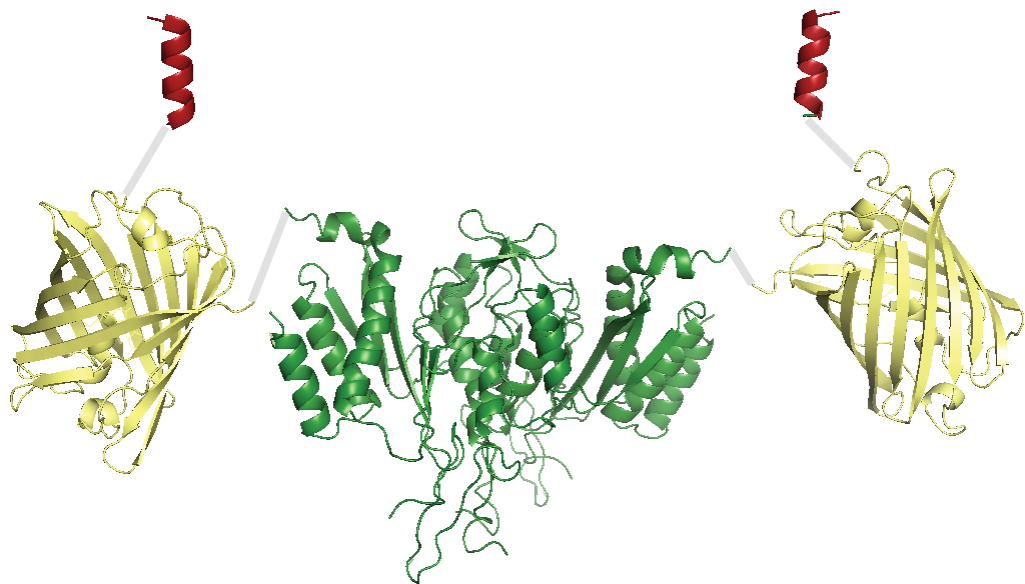**B**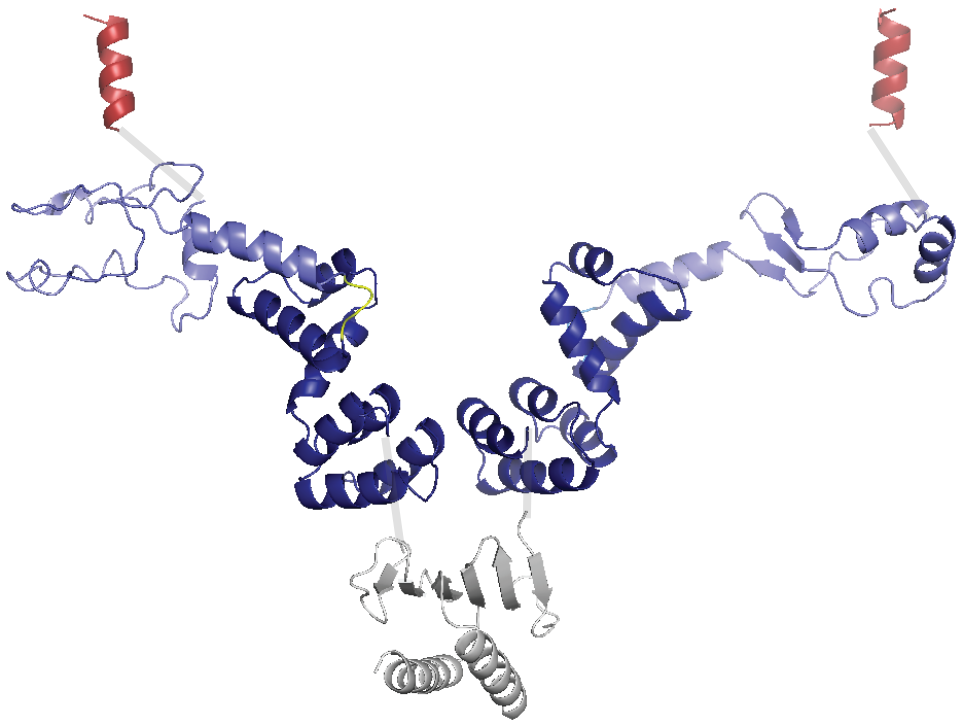**C**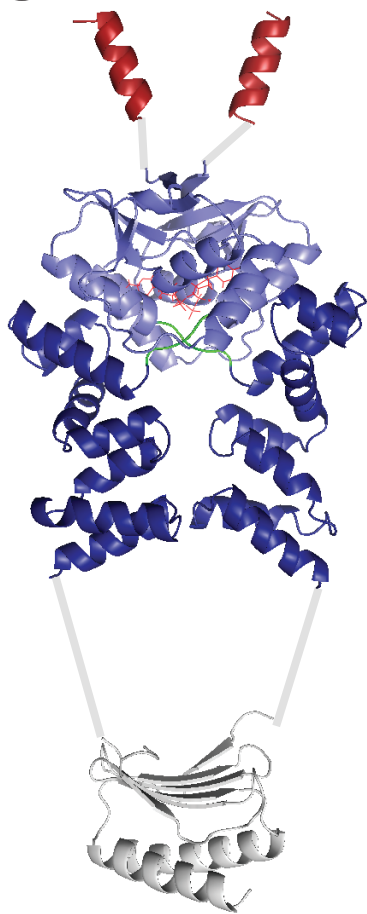

Supplement: supp [file elife_poa_e65651_Figure_2_figure_supplement_3.pdf › elife_poa_e65651_Figure_2_figure_supplement_3.pdf]

**A***Without EcoRI site oligo*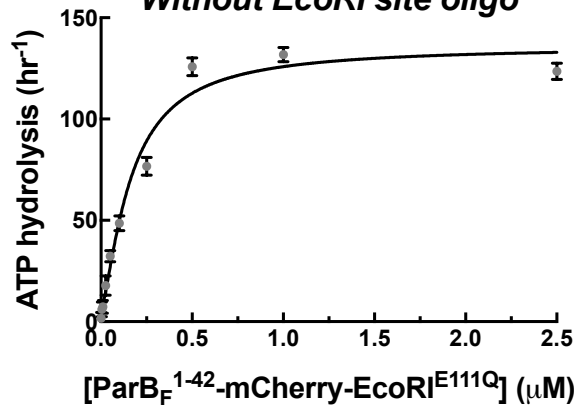**B***With 3 mM EcoRI site oligo*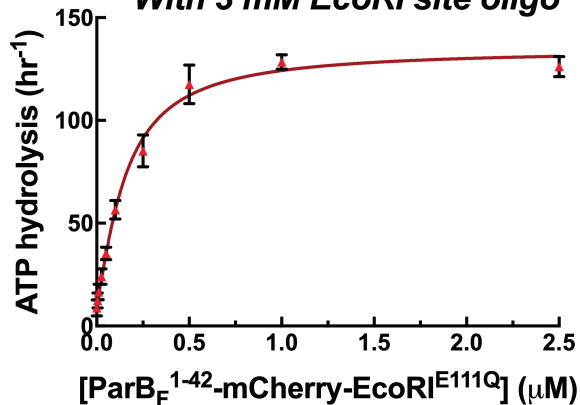

Supplement: supp [file elife_poa_e65651_Figure_2_figure_supplement_4.pdf › elife_poa_e65651_Figure_2_figure_supplement_4.pdf]

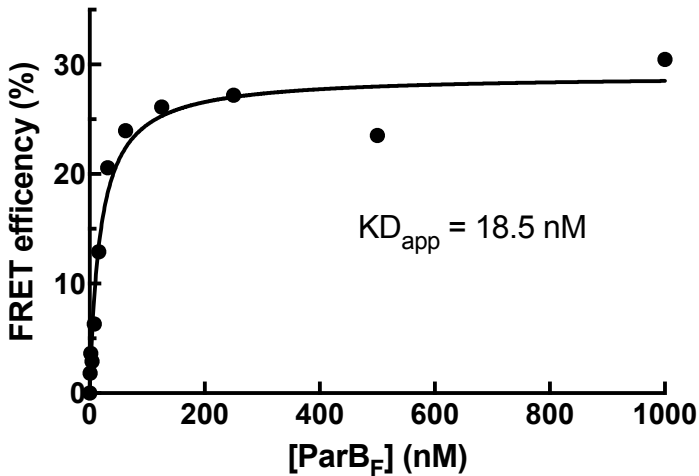

Supplement: supp [file elife_poa_e65651_Figure_4_figure_supplement_1.pdf › elife_poa_e65651_Figure_4_figure_supplement_1.pdf]

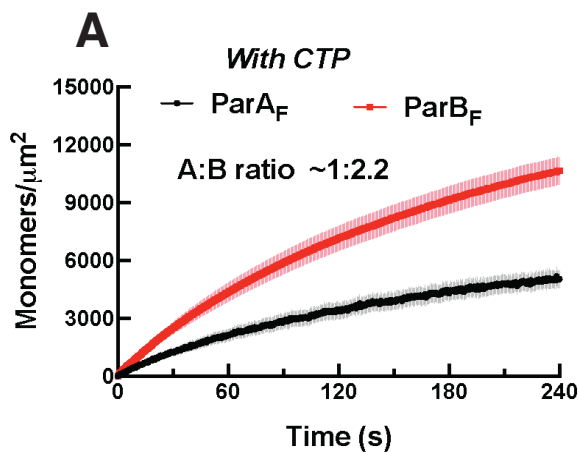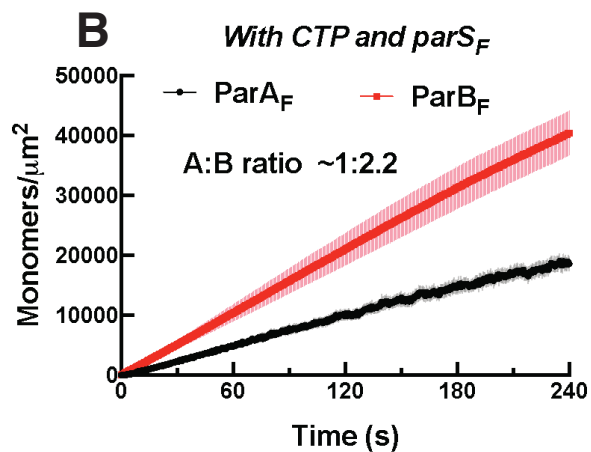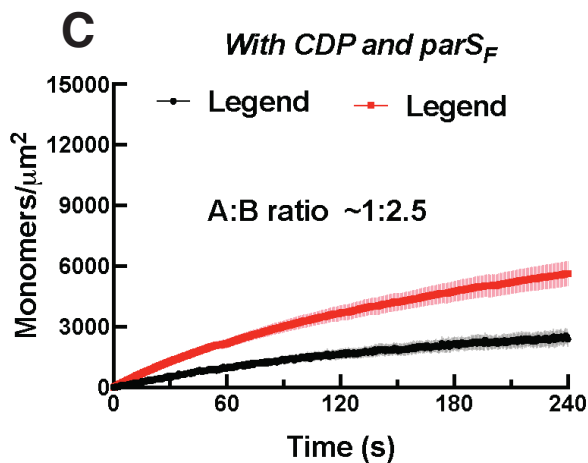

Supplement: supp [file elife_poa_e65651_Figure_5_figure_supplement_1.pdf › elife_poa_e65651_Figure_5_figure_supplement_1.pdf]

**A**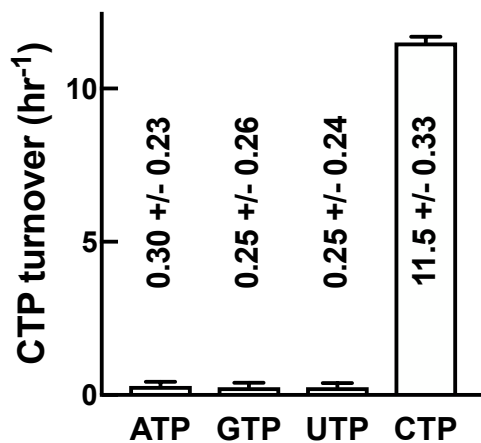**B**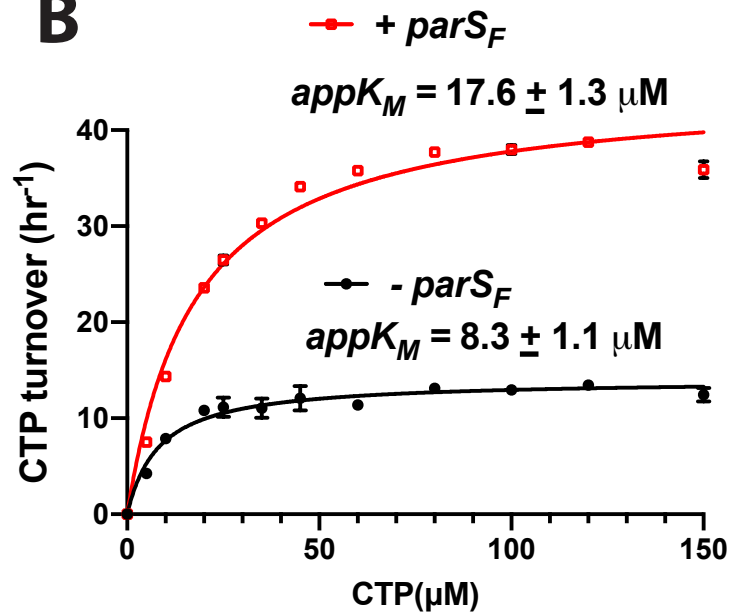**D**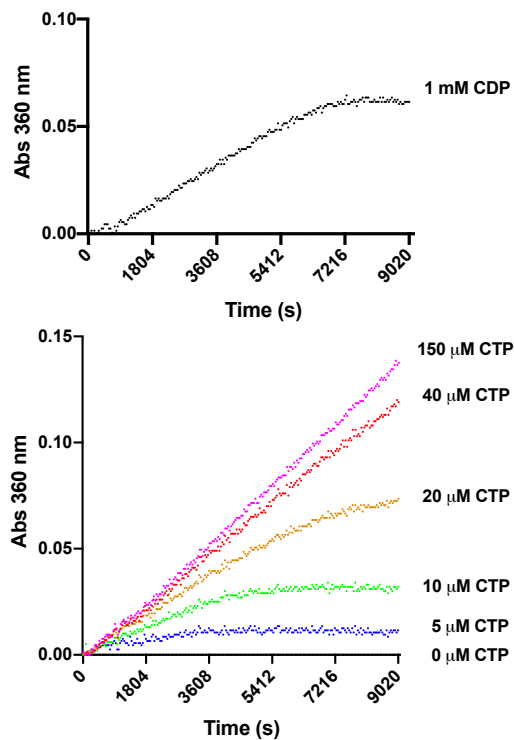**C**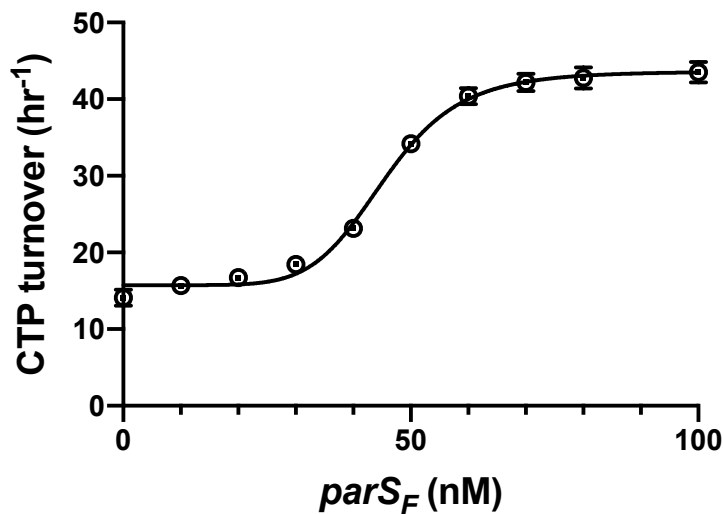

Supplement: supp [file elife_poa_e65651_Figure_5_figure_supplement_2.pdf › elife_poa_e65651_Figure_5_figure_supplement_2.pdf]

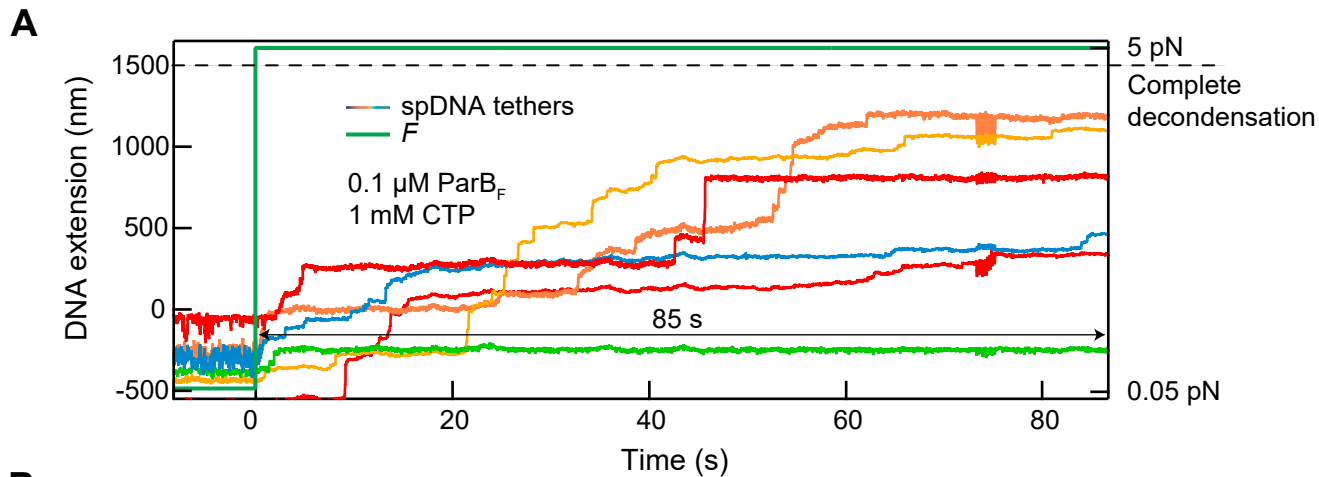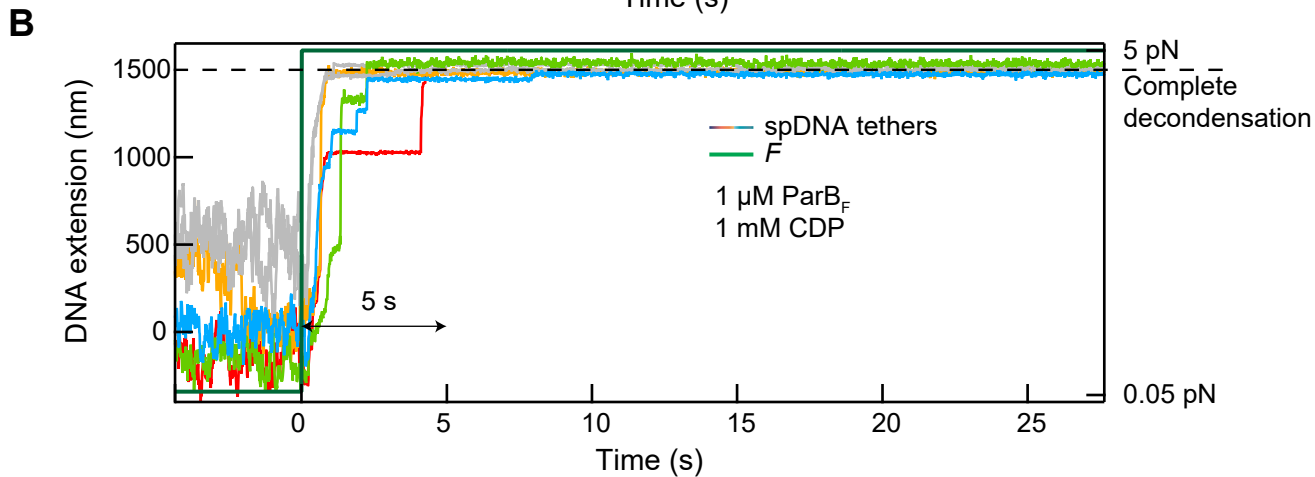

Supplement: supp [file elife_poa_e65651_Figure_6_figure_supplement_1.pdf › elife_poa_e65651_Figure_6_figure_supplement_1.pdf]

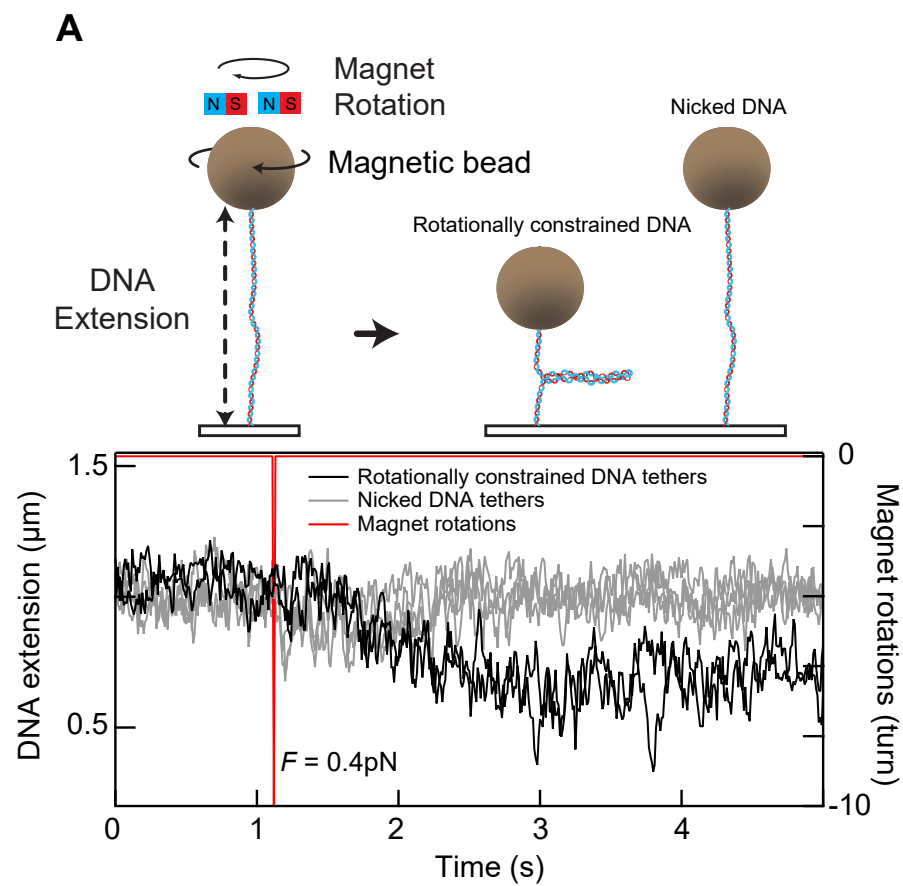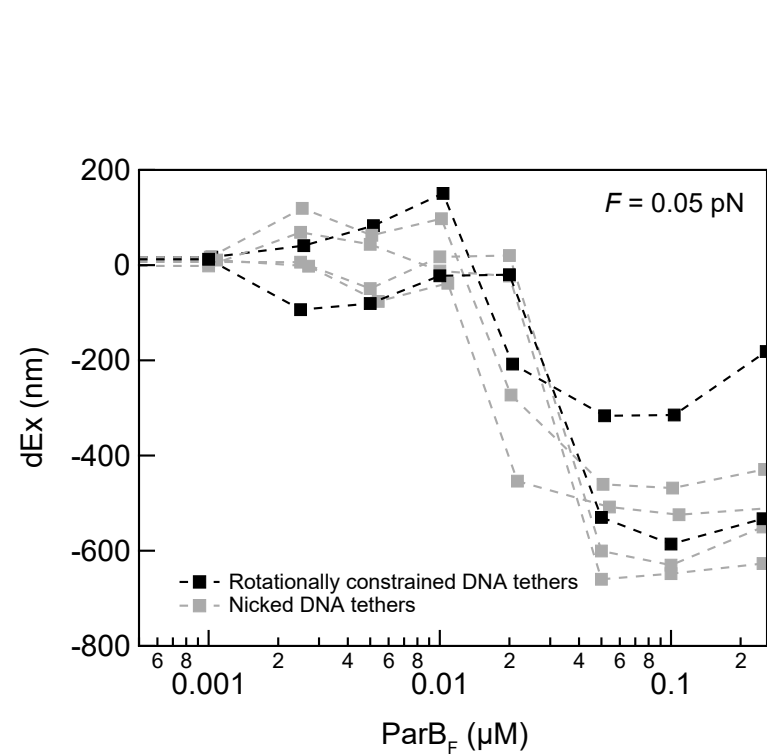

Supplement: supp [file elife_poa_e65651_Figure_6_figure_supplement_2.pdf › elife_poa_e65651_Figure_6_figure_supplement_2.pdf]

No nsDNA tether condensation by adding  $\text{ParB}_F$  and  $\text{parS}_F$  oligo

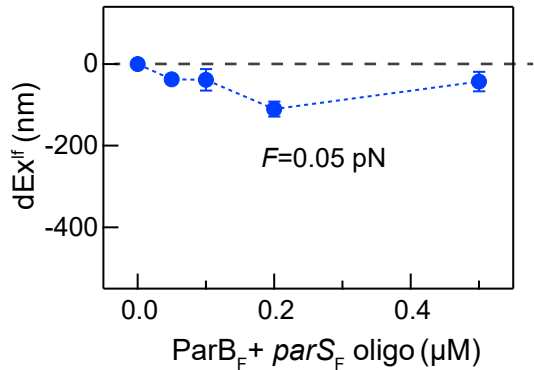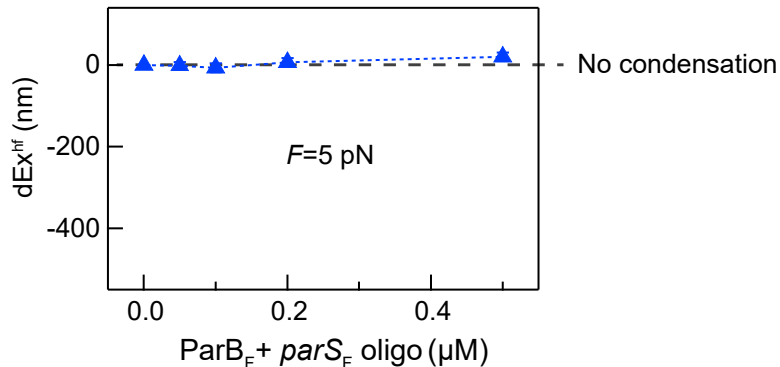

Supplement: supp [file elife_poa_e65651_Figure_6_figure_supplement_3.pdf › elife_poa_e65651_Figure_6_figure_supplement_3.pdf]
